# Supplementary material for: Identification of Disease-Associated Cryptococcal Proteins Reactive With Serum IgG From Cryptococcal Meningitis Patients
Source: Front Immunol. 2021 Jul 23;12:709695. doi: 10.3389/fimmu.2021.709695 (PMC8342929; doi:10.3389/fimmu.2021.709695)
Supplement: Supplementary file 10 [file Table_4.xlsx]

## Sheet: Summary proteins in spots
Supplementary table 4: Proteins identified in the eleven spots of interest marked in Figure 3C are listed.
Identification of each protein in the respective spot is marked with an "x".
Accession number was retrieved from the NCBI protein database: https://www.ncbi.nlm.nih.gov/protein/.
Raw data of mass spectrometry analysis is provided in separate register tabs for each spot.
		Identification in spot:
accession	Protein name	26271	score 1	score 2	26329	score 12	score 23	27684	score 19	score 29	36595	score 110	score 210	26344	score 13	score 22	27537	score 18	score 28	39916	score 111	score 211	26409	score 14	score 24	26502	score 15	score 25	26814	score 16	score 26	26944	score 17	score 27
AFR94156	2,3-bisphosphoglycerate-independent phosphoglycerate mutase [Cryptococcus neoformans var. grubii H99]							x		104										x	112	105
AFR93317	20S proteasome subunit beta 1																									x	285
AFR98380	26S protease regulatory subunit 6A-B [Cryptococcus neoformans var. grubii H99]													x	352	72
AFR92184	26S proteasome regulatory subunit N8 [Cryptococcus neoformans var. grubii H99]																															x		87
AFR98890	2-dehydropantoate 2-reductase																												x	211	127
AFR92474	3~(2~),5~-bisphosphate nucleotidase [Cryptococcus neoformans var. grubii H99]																x	475					x		153				x	86
AFR94742	3-deoxy-7-phosphoheptulonate synthase [Cryptococcus neoformans var. grubii H99]																			x	185	139
AFR94296	3-oxoacid CoA-transferase [Cryptococcus neoformans var. grubii H99]							x	912	544
AFR98086	5-methyltetrahydropteroyltriglutamate-homocysteine S-methyltransferase [Cryptococcus neoformans var. grubii H99]							x	260	333										x	251	392
AFR94072	6-phosphogluconate dehydrogenase, decarboxylating 1 [Cryptococcus neoformans var. grubii H99]																x	311	275				x		114				x	159	303
AFR98659	acetolactate synthase, small subunit [Cryptococcus neoformans var. grubii H99]																															x		282
AFR93774	acetyl-CoA C-acetyltransferase [Cryptococcus neoformans var. grubii H99]										x	204								x	1423	1016
AFR95008	aconitate hydratase, mitochondrial							x	243	348										x	216
AFR92615	actin [Cryptococcus neoformans var. grubii H99]																x	215	143				x	254
AFR96928	actin binding protein [Cryptococcus neoformans var. grubii H99]																												x	81
AFR96040	alanine-tRNA ligase [Cryptococcus neoformans var. grubii H99]													x	243	188
AFR96761	alcohol dehydrogenase, propanol-preferring [Cryptococcus neoformans var. grubii H99]																												x	179	119
AFR95862	allergen [Cryptococcus neoformans var. grubii H99]																												x	124
AFR95964	anthranilate synthase component I [Cryptococcus neoformans var. grubii H99]							x		70
AFR93867	argininosuccinate lyase [Cryptococcus neoformans var. grubii H99]																															x		154
AFR95199	argininosuccinate synthase [Cryptococcus neoformans var. grubii H99]																x		206
AFR98265	aspartate aminotransferase [Cryptococcus neoformans var. grubii H99]																			x	65	135
AFR92389	aspartate-semialdehyde dehydrogenase [Cryptococcus neoformans var. grubii H99]																			x	352	241
AFR96238	ATP synthase subunit beta, mitochondrial [Cryptococcus neoformans var. grubii H99]																									x	238
AFR96168	ATP-dependent RNA helicase DBP2-A [Cryptococcus neoformans var. grubii H99]										x	566	302
AFR97093	ATP-dependent RNA helicase DBP5 [Cryptococcus neoformans var. grubii H99]													x	95
AFR98608	branched-chain amino acid aminotransferase [Cryptococcus neoformans var. grubii H99]																			x	264	180
AFR99095	branched-chain-amino-acid transaminase [Cryptococcus neoformans var. grubii H99]																x	135
AFR94513	catalase [Cryptococcus neoformans var. grubii H99]													x	149	173
AFR94509	chaperone regulator [Cryptococcus neoformans var. grubii H99]																			x	91	96
AFR97763	chlorophyll synthesis pathway protein BchC																x	433	203				x	2935	2328	x	78	75	x	823	304	x	875	803
AFR99053	chorismate synthase [Cryptococcus neoformans var. grubii H99]																			x	111	126
AFR92199	citrate synthase, mitochondrial [Cryptococcus neoformans var. grubii H99]																			x	213	242
AFR95319	COP9 signalosome complex subunit 1 [Cryptococcus neoformans var. grubii H99]				x	254
AFR93749	cytoplasmic protein [Cryptococcus neoformans var. grubii H99]	x		568	x	162
AFR94962	cytoplasmic protein [Cryptococcus neoformans var. grubii H99]																															x	125	256
AFR93365	cytoplasmic protein [Cryptococcus neoformans var. grubii H99]																			x	354	343
AFR93041	dehydrogenase [Cryptococcus neoformans var. grubii H99]																x	378
AFR94562	deoxyuridine 5~-triphosphate nucleotidohydrolase [Cryptococcus neoformans var. grubii H99]				x	106		x		156
AFR94390	diphosphomevalonate decarboxylase [Cryptococcus neoformans var. grubii H99]																			x	203	451
AFR95638	D-lactaldehyde dehydrogenase [Cryptococcus neoformans var. grubii H99]																x	50		x	132
AFR94027	D-lactate dehydrogenase													x	398	303
AFR92550	elongation factor 1-gamma [Cryptococcus neoformans var. grubii H99]																			x	199	284							x		403
AFR94637	elongation factor 2 [Cryptococcus neoformans var. grubii H99]																			x	146								x		223	x		216
AFR93435	endothelin-converting enzyme [Cryptococcus neoformans var. grubii H99]							x	80
AFR97484	extracellular elastinolytic metalloproteinase [Cryptococcus neoformans var. grubii H99]													x	190
AFR95720	fatty acid synthase subunit beta, fungi type [Cryptococcus neoformans var. grubii H99]																x		59
AFR95957	formate dehydrogenase [Cryptococcus neoformans var. grubii H99]																			x	126
AFR93031	fructose-bisphosphate aldolase 1																x	744	302													x		292
AFR97862	fumarate hydratase, mitochondrial [Cryptococcus neoformans var. grubii H99]																									x		152
AFR98332	G protein beta subunit-like [Cryptococcus neoformans var. grubii H99]																															x	145
AFR93446	galactokinase [Cryptococcus neoformans var. grubii H99]													x	100
AFR94515	glucose-methanol-choline oxidoreductase							x	704	966							x	147	230	x	130					x		136	x	123	213
AFR94518	glutamate decarboxylase [Cryptococcus neoformans var. grubii H99]							x	136	74
AFR97782	glutamate dehydrogenase (NADP) [Cryptococcus neoformans var. grubii H99]																x	212	139				x	666	74				x		98	x	246	199
AFR92589	Glutamine synthetase																x	505														x		43
AFR95986	Glyceraldehyde-3-phosphate dehydrogenase																			x	288		x	206					x	295	225
AFR97947	glycerol-3-phosphate dehydrogenase (NAD()) [Cryptococcus neoformans var. grubii H99]																			x	106	94
AFR92257	glycerol-3-phosphate dehydrogenase (NAD(+))																						x		129				x	1430	445
AFR97979	glyoxylate reductase [Cryptococcus neoformans var. grubii H99]																												x	289
AFR98073	GMP synthase [glutamine-hydrolyzing] [Cryptococcus neoformans var. grubii H99]																			x		102
AFR94332	GTP-binding protein ypt1 [Cryptococcus neoformans var. grubii H99]																									x	191		x		199
AFR93876	GTP-binding protein ypt2																									x	435
AFR98895	guanine nucleotide-binding protein subunit beta-like protein [Cryptococcus neoformans var. grubii H99]							x		146													x	254	181
AFR98435	heat shock 70kDa protein 4	x	1715		x	248											x		127
AFR98912	hexokinase [Cryptococcus neoformans var. grubii H99]				x	157	207
AFR95155	homocitrate synthase, mitochondrial [Cryptococcus neoformans var. grubii H99]													x	185	100							x		57				x	156
AFR94878	homoisocitrate dehydrogenase [Cryptococcus neoformans var. grubii H99]																			x	233
AFR97441	homoserine dehydrogenase [Cryptococcus neoformans var. grubii H99]																x	425					x		335							x	114	143
AFR97929	hsp71-like protein [Cryptococcus neoformans var. grubii H99]				x	125	240							x	230	117	x	388	291				x		296	x		114	x	113		x	226	1557
AFR97952	hsp72-like protein, partial				x	125	242							x	230	117	x	388	313				x		296	x		114	x	113		x	226	1293
AFR92468	hsp75-like protein	x		3056	x	161	373							x	187	86	x		249							x		200
AFR92228	hypothetical protein CNAG_00091 [Cryptococcus neoformans var. grubii H99]																			x		142
AFR92542	hypothetical protein CNAG_00409 [Cryptococcus neoformans var. grubii H99]																									x		234
AFR96330	hypothetical protein CNAG_03106 [Cryptococcus neoformans var. grubii H99]																x	157
AFR93260	hypothetical protein CNAG_03755 [Cryptococcus neoformans var. grubii H99]																						x		200
AFR93378	hypothetical protein CNAG_03878 [Cryptococcus neoformans var. grubii H99]													x	105
AFR94491	hypothetical protein CNAG_05236 [Cryptococcus neoformans var. grubii H99]													x	184
AFR99027	hypothetical protein CNAG_05599 [Cryptococcus neoformans var. grubii H99]																x	103
AFR96057	hypothetical protein CNAG_05739 [Cryptococcus neoformans var. grubii H99]																						x	128	132
AFR98334	hypothetical protein CNAG_06109 [Cryptococcus neoformans var. grubii H99]																			x	247	291
AFR98337	hypothetical protein CNAG_06113 [Cryptococcus neoformans var. grubii H99]																						x		140
AFR98529	hypothetical protein CNAG_06294 [Cryptococcus neoformans var. grubii H99]																			x		156
AFR94883	hypothetical protein CNAG_06946 [Cryptococcus neoformans var. grubii H99]																						x		174							x	202	287
AFR92180	hypothetical protein CNAG_07308 [Cryptococcus neoformans var. grubii H99]							x	92
AFR95288	inorganic pyrophosphatase [Cryptococcus neoformans var. grubii H99]																												x	197	94
AFR93420	isocitrate dehydrogenase, NADP-dependent [Cryptococcus neoformans var. grubii H99]																			x		65
AFR96043	ketol-acid reductoisomerase, mitochondrial																									x	132					x	295	355
AFR96458	lactamase [Cryptococcus neoformans var. grubii H99]																												x	234	233
AFR97455	large subunit ribosomal protein L4e [Cryptococcus neoformans var. grubii H99]																x	120
AFR96301	large subunit ribosomal protein L7/L12 [Cryptococcus neoformans var. grubii H99]																									x		109
AFR98612	malate dehydrogenase (oxaloacetate-decarboxylating)(NADP) [Cryptococcus neoformans var. grubii H99]							x		132
AFR98009	Mannose-1-phosphate guanyltransferase																x	257	79				x	125	135				x	357	299
AFR92890	methylenetetrahydrofolate reductase [Cryptococcus neoformans var. grubii H99]	x		173
AFR97886	mitochondrial outer membrane 72K protein [Cryptococcus neoformans var. grubii H99]				x	232
AFR94353	mitochondrial protein [Cryptococcus neoformans var. grubii H99]																x		201
AFR98685	mitochondrial splicing suppressor							x	169	362
AFR94019	NAD dependent epimerase/dehydratase [Cryptococcus neoformans var. grubii H99]																			x	118
AFR95702	NAD-binding Rossmann fold oxidoreductase family protein																x	158	680
AFR93132	NADH dehydrogenase (quinone), G subunit [Cryptococcus neoformans var. grubii H99]							x		137
AFR95169	NADH dehydrogenase (ubiquinone) 1 alpha subcomplex 9										x		147							x	508	1103
AFR95611	nucleolar protein 56 [Cryptococcus neoformans var. grubii H99]													x	66
AFR95389	phosphoacetylglucosamine mutase [Cryptococcus neoformans var. grubii H99]							x		75
AFR98550	phosphoglucomutase				x	1322	602							x	232
AFR98239	phosphomevalonate kinase [Cryptococcus neoformans var. grubii H99]				x	372
AFR95598	phosphopantothenate-cysteine ligase [Cryptococcus neoformans var. grubii H99]																			x	268	331
AFR92431	phosphopantothenoylcysteine decarboxylase [Cryptococcus neoformans var. grubii H99]																						x		101
AFR96924	phosphoribosylformylglycinamidine synthase [Cryptococcus neoformans var. grubii H99]																x		195
AFR97935	pre-mRNA-processing factor 19 [Cryptococcus neoformans var. grubii H99]							x	544	160
AFR93582	proline-tRNA ligase [Cryptococcus neoformans var. grubii H99]							x		213
AFR94490	protein BMH2 [Cryptococcus neoformans var. grubii H99]																									x		147
AFR96926	protein transporter SEC13 [Cryptococcus neoformans var. grubii H99]																												x		158
AFR97413	protein transporter SEC31 [Cryptococcus neoformans var. grubii H99]				x	125
AFR97558	pyruvate decarboxylase	x		74	x	187	74	x	615	395				x	232	195	x	197	254							x		128	x	407	439	x	188	339
AFR95859	pyruvate dehydrogenase (acetyl-transferring) E1 component, alpha subunit [Cryptococcus neoformans var. grubii H99]																			x	124	143
AFR95026	pyruvate dehydrogenase complex dihydrolipoamide acetyltransferase [Cryptococcus neoformans var. grubii H99]							x	456	397
AFR98016	pyruvate kinase [Cryptococcus neoformans var. grubii H99]							x	390	206							x		58
AFR98791	ribose-phosphate pyrophosphokinase [Cryptococcus neoformans var. grubii H99]																															x	169
AFR98523	RNA binding protein [Cryptococcus neoformans var. grubii H99]																												x	141
AFR98395	S-(hydroxymethyl)glutathione dehydrogenase																			x	891	427
AFR94627	saccharopine dehydrogenase (NAD, L-lysine forming) [Cryptococcus neoformans var. grubii H99]																x		191
AFR92551	S-adenosylmethionine synthase [Cryptococcus neoformans var. grubii H99]																x		160
AFR94380	sarcosine oxidase [Cryptococcus neoformans var. grubii H99]																x		63
AFR95498	small subunit ribosomal protein S9 [Cryptococcus neoformans var. grubii H99]																									x	59
AFR92237	stress-induced-phosphoprotein 1 [Cryptococcus neoformans var. grubii H99]																			x	190
AFR96921	succinate dehydrogenase [ubiquinone] flavoprotein subunit, mitochondrial [Cryptococcus neoformans var. grubii H99]																x		172				x		85				x	70	114
AFR97747	taurine catabolism dioxygenase TauD [Cryptococcus neoformans var. grubii H99]																			x	110	282
AFR92579	T-complex protein 1 subunit beta [Cryptococcus neoformans var. grubii H99]							x	122	255
AFR92196	T-complex protein 1 subunit epsilon [Cryptococcus neoformans var. grubii H99]				x	107
AFR93954	T-complex protein 1 subunit theta [Cryptococcus neoformans var. grubii H99]																x		125
AFR98178	transaldolase [Cryptococcus neoformans var. grubii H99]																									x		155	x	639		x	373	320
AFR98460	transcription factor C subunit 7 [Cryptococcus neoformans var. grubii H99]																x		55
AFR95182	transketolase [Cryptococcus neoformans var. grubii H99]							x	140	210							x	214	81	x	226	96	x	129	58				x	150	153	x		146
AFR93294	tubulin alpha-1A chain [Cryptococcus neoformans var. grubii H99]																x	70	361
AFR94444	ubiquinol-cytochrome c reductase core subunit 2 [Cryptococcus neoformans var. grubii H99]																			x	416	326
AFR92273	ubiquitin-activating enzyme E1 [Cryptococcus neoformans var. grubii H99]													x	176	118
AFR92826	UDP-glucose 4-epimerase																x	590	429
AFR96254	UMP-CMP kinase [Cryptococcus neoformans var. grubii H99]																															x	276
AFR95492	uracil phosphoribosyltransferase																									x	364
AFR92807	urease accessory protein UreG [Cryptococcus neoformans var. grubii H99]																						x	263	115				x	220	148
AFR93944	UTP-glucose-1-phosphate uridylyltransferase [Cryptococcus neoformans var. grubii H99]																			x	131
AFR95502	V-type proton ATPase catalytic subunit A [Cryptococcus neoformans var. grubii H99]													x	406	2003
AFR95034	xenobiotic reductase [Cryptococcus neoformans var. grubii H99]																x	181

## Sheet: ID26271
Gel	Protein Accession	Protein Description	Protein Score	Protein Mass	Matched Peptides	Protein Coverage
37	2::AFR98435.1	heat shock 70kDa protein 4 [Cryptococcus neoformans var. grubii H99]	1715	85923	38	58
37	2::XP_012053205.1	heat shock 70kDa protein 4 [Cryptococcus neoformans var. grubii H99]	1715	85923	38	58
Peptide exp mz	Peptide exp z	Peptide calc mr	Peptide delta	Peptide Misscleav	Peptide Score	Peptide Sequence	Peptide var Modi
399.734	2	797.444	0.0093	0	55.56	VLTFYR
429.753	2	857.486	0.0062	0	70.13	IDVLSSPK
442.757	2	883.492	0.0085	0	45.56	GINPWIGK
462.757	2	923.486	0.0119	0	39.84	IQQFFGGK
477.774	2	953.529	0.0032	0	61.97	LTDHLLSR
486.274	2	970.527	0.0062	0	81.03	AMGDPIVLR
494.275	2	986.522	0.0136	0	93.14	AMGDPIVLR	Oxidation (M)
550.312	2	1098.6	0.0064	0	59.04	PVITSAEINR
552.81	2	1103.6	0.0075	0	56.62	TPSLVSFTPR
575.334	2	1148.64	0.0092	1	71.92	YKIDVLSSPK
578.341	2	1154.65	0.0129	0	68.24	VSVPLAEALEK
586.787	2	1171.55	0.0094	0	67.18	YANYVQASEK
588.333	2	1174.63	0.0171	0	66.73	ATPSLVSFTPR
593.298	2	1184.57	0.014	0	75.58	ADLPESTEAPR
664.868	2	1327.71	0.0114	0	96.68	GIDIIVNEVSNR
686.83	2	1371.63	0.0138	0	71.94	NALEEYVYDTR
696.315	2	1390.61	0.0064	0	72.83	EEEVTVGEGEDAK
701.387	2	1400.75	0.009	0	118.32	ASVVGIDLGNLSSK	Acetyl (S) [+42.01]
713.894	2	1425.76	0.0159	0	97.79	NVNPVITSAEINR
715.404	2	1428.78	0.011	1	64.84	SVEKPASGDLSIVK
742.375	2	1482.73	0.0068	0	87.12	GATFACASLSPVFR
743.329	2	1484.63	0.012	0	84.13	SFNDPEVEEYEK
748.438	2	1494.85	0.0097	0	110.43	ALLDAANIAGLNALR
500.918	3	1499.73	0.0082	1	53.72	KNALEEYVYDTR
777.397	2	1552.77	0.0059	0	71.31	VTTETPQQPPAQEK
802.428	2	1602.84	0.0043	0	101.41	VLNFTLNQDEAIAR
538.589	3	1612.73	0.0186	1	61.25	SFNDPEVEEYEKK
831.961	2	1661.9	0.0081	0	132	LINDNTAVALGYGITK
559.637	3	1675.88	0.011	1	50.48	EDVVYSSNAILNKPK
858.474	2	1714.93	0.0077	0	68.45	FINAQLVDVNGEIGVK
579.263	3	1734.76	0.0107	1	24.13	MHAEDKLVMETEDR	2 Oxidation (M)
583.947	3	1748.8	0.0224	1	30.93	EEEVTVGEGEDAKTEK
883.428	2	1764.84	0.0068	0	101.35	GDCPVVSQYTGLVQDK
883.93	2	1765.84	0.0077	0	102.1	EALNTYLTAAQGEEEK
898.427	2	1794.84	0.0027	0	26.28	CATTQQWLEDQLFR
611.67	3	1831.98	0.0105	2	22.87	REDVVYSSNAILNKPK
939.471	2	1876.92	0.0061	0	76.26	QGAFELEAAYADPASLPK
631.99	3	1892.93	0.017	1	70.55	KGDCPVVSQYTGLVQDK
637.319	3	1908.93	0.0108	1	67.07	KGDCPVVSQYTGLVQDK	Ox (CFHMPWY) [+15.99]
958.005	2	1914.01	-0.0112	0	24.76	AGLTIDQIDAVELVGGSTR
832.406	3	2494.18	0.0139	1	27.81	VTTETPQQPPAQEKTEEEPEAR
834.409	3	2500.2	0.0083	0	73.47	EAGNPDEDTELVVFGTANPIPSTK
964.484	3	2890.42	0.0067	0	99.65	VLSANTEAPINVESLMNDIDATSTLTR	Oxidation (M)
Gel	Protein Accession	Protein Description	Protein Score	Protein Mass	Matched Peptides	Protein Coverage
39	2::AFR92468.1	hsp75-like protein [Cryptococcus neoformans var. grubii H99]	3056	67372	34	59.1
39	2::XP_012046659.1	hsp75-like protein [Cryptococcus neoformans var. grubii H99]	3056	67372	34	59.1
Peptide exp mz	Peptide exp z	Peptide calc mr	Peptide delta	Peptide Misscleav	Peptide Score	Peptide Sequence	Peptide var Modi
452.724	2	903.43	0.0029	0	68.07	LDISDDAR
457.726	2	913.429	0.0086	0	44.66	VSEYFGGR
499.808	2	997.592	0.0089	0	70.56	GAIAGLEVLR
510.772	2	1019.53	0.0012	0	54.62	EEINAVAFK
512.237	2	1022.46	0.0011	0	44.47	LSSEEIQAM	Oxidation (M)
514.267	2	1026.51	0.0055	0	55.8	LVSEYFGGR
524.754	2	1047.49	0.0063	0	55.06	SDLEAYLHT
535.326	2	1068.63	0.0077	0	72.18	AGAIAGLEVLR
549.256	2	1096.49	0.0033	0	56.12	PAYFNDSQR
557.779	2	1113.55	-0.0028	0	54.18	SLVSEYFGGR
558.314	2	1114.61	0.0044	0	56.56	AQITIQNSVGR	Gln->Gly (Q) [-71.04]
560.283	2	1118.55	0.005	1	84	EDATADELKK
564.802	2	1127.58	0.0121	0	42.41	HWPFSVIDK
566.304	2	1130.59	0.0012	0	62.59	DDIVLVGGSTR
566.812	2	1131.59	0.0166	0	78.43	NPLNTIFDAK
568.289	2	1134.56	0.0052	0	48.3	SSEEIQAMIK
576.288	2	1150.55	0.0065	0	62.88	SSEEIQAMIK	Oxidation (M)
584.316	2	1166.6	0.0205	0	75.56	FEEINAVAFK
584.799	2	1167.58	0.0033	0	70.52	FEEINAVAFK	Deamidated (NQ) [+0.98]
592.845	2	1183.66	0.0187	0	84.83	DAGAIAGLEVLR
593.835	2	1185.65	0.0078	0	66.64	AQITIQNSVGR
594.327	2	1186.63	0.0082	0	62.24	AQITIQNSVGR	Deamidated (NQ) [+0.98]
598.79	2	1195.56	0.0035	0	72.51	VPAYFNDSQR
606.832	2	1211.65	-0.0015	0	52.31	DAGAIAGLEVLR	Formyl (N-term) [+27.99]
614.826	2	1227.62	0.0172	0	83.56	VEIIANDQGNR
615.315	2	1228.6	0.0111	0	64.04	VEIIANDQGNR	Deamidated (NQ) [+0.98]
615.847	2	1229.66	0.0181	0	82.7	VDDIVLVGGSTR
621.813	2	1241.6	0.0084	0	73.43	QSLVSEYFGGR
624.312	2	1246.6	0.005	1	73.28	QEDATADELKK
624.835	2	1247.64	0.0133	0	74.06	LSSEEIQAMIK
627.809	2	1253.6	0.0077	1	77.61	KTFSPQEISAM	Oxidation (M)
628.305	2	1254.59	0.0077	0	94.62	PSYVAFTEGER
632.836	2	1263.64	0.0194	0	83.8	LSSEEIQAMIK	Oxidation (M)
639.838	2	1277.65	0.0085	0	67.41	LSSEEIQAMIK	Oxidation (M); Methyl (DE) [+14.02]
640.327	2	1278.63	0.0123	0	90.72	MNPLNTIFDAK	Oxidation (M)
640.827	2	1279.63	0.0068	0	103.35	LSSEEIQAMIK	DiOx (CFMPWY) [+31.99]
649.318	2	1296.61	0.0112	0	56.41	TVPAYFNDSQR
652.356	2	1302.69	0.0125	0	93.3	SPQEISAMVLTK
438.925	3	1313.74	0.0102	1	66.6	KAQITIQNSVGR
657.883	2	1313.74	0.0103	1	86.66	KAQITIQNSVGR
440.569	3	1318.68	0.0042	0	46.79	SPQEISAMVLTK	Oxidation (M)
660.358	2	1318.68	0.0209	0	90.31	SPQEISAMVLTK	Oxidation (M)
662.359	2	1322.7	0.0044	1	72.92	RFEEINAVAFK
678.362	2	1354.69	0.0215	0	87.73	IQSLVSEYFGGR
681.33	2	1360.64	0.0101	0	95.04	LEQEDATADELK
465.589	3	1393.74	0.0084	1	59.25	ARFEEINAVAFK
697.881	2	1393.74	0.0124	1	66.76	ARFEEINAVAFK
698.85	2	1395.68	0.0081	0	62.4	VTVPAYFNDSQR
719.366	2	1436.7	0.0206	0	117.61	SAMNPLNTIFDAK	Oxidation (M)
729.361	2	1456.68	0.0229	0	70.14	TTPSYVAFTEGER
733.888	2	1465.75	0.0126	0	84.22	FSPQEISAMVLTK	Oxidation (M)
491.247	3	1470.72	-0.0005	1	51.27	LEQEDATADELKK	Dehydrated (D) [-18.01]
737.349	2	1472.68	0.0054	0	65.21	TTPSYVAFTEGER	Ox (CFHMPWY) [+15.99]
743.351	2	1484.71	-0.0267	0	89.76	TTPSYVAFTEGER	2 Methyl (T) [+14.02]
745.376	2	1488.73	0.0059	1	91.9	LEQEDATADELKK
497.26	3	1488.73	0.0277	1	91.78	LEQEDATADELKK
499.26	3	1494.75	0.0121	0	62.68	VVTVPAYFNDSQR
748.39	2	1494.75	0.018	0	64.47	VVTVPAYFNDSQR
501.924	3	1502.75	0.0051	1	62.04	LEQEDATADELKK	Methyl (DE) [+14.02]
776.412	2	1550.8	0.0082	0	79.58	TFSPQEISAMVLTK
779.904	2	1557.79	0.007	0	49.5	LGEFELSGIPPMPR	Oxidation (M)
783.394	2	1564.76	0.0182	0	98.55	QSAMNPLNTIFDAK	Oxidation (M)
522.942	3	1565.78	0.0188	0	61.65	AVVTVPAYFNDSQR
783.91	2	1565.78	0.0216	0	68.42	AVVTVPAYFNDSQR
523.277	3	1566.8	0.0132	0	50.71	TFSPQEISAMVLTK	Oxidation (M)
784.418	2	1566.8	0.0256	0	100.76	TFSPQEISAMVLTK	Oxidation (M)
792.408	2	1582.79	0.0105	0	73.01	TFSPQEISAMVLTK	Oxidation (M); Oxidation (V) [+15.99]
798.409	2	1594.79	0.013	0	49.28	TFSPQEISAMVLTK	Oxidation (M); Formyl (T) [+27.99]
814.382	2	1626.74	0.0088	0	82.82	DGSPYVEVDYLNEK
832.414	2	1662.8	0.0099	0	90.36	NQSAMNPLNTIFDAK
557.968	3	1670.87	0.0113	0	53.69	LLGEFELSGIPPMPR	Oxidation (M)
836.449	2	1670.87	0.0133	0	105.08	LLGEFELSGIPPMPR	Oxidation (M)
839.899	2	1677.84	-0.0552	0	72.27	NQSAMNPLNTIFDAK	Oxidation (M); Asn->Xle (N) [-0.96]
560.614	3	1678.8	0.0213	0	77.74	NQSAMNPLNTIFDAK	Oxidation (M)
840.418	2	1678.8	0.0234	0	127.26	NQSAMNPLNTIFDAK	Oxidation (M)
840.902	2	1679.78	0.0079	0	103.52	NQSAMNPLNTIFDAK	Oxidation (M); Deamidated (NQ) [+0.98]
846.413	2	1690.83	-0.0237	0	70.45	NQSAMNPLNTIFDAK	Oxidation (M); Ser->Val (S) [+12.04]
565.639	3	1693.88	0.0152	1	80.13	KAVVTVPAYFNDSQR
848.409	2	1694.79	0.0093	0	109.08	NQSAMNPLNTIFDAK	DiOx (CFMPWY) [+31.99]
565.971	3	1694.89	0.0004	1	43.44	KTFSPQEISAMVLTK	Oxidation (M)
854.409	2	1706.84	-0.0379	0	76.78	NQSAMNPLNTIFDAK	Oxidation (M); Gln->Arg (Q) [+28.04]
579.951	3	1736.83	0.0063	1	48.68	DGSPYVEVDYLNEKK	Dehydrated (D) [-18.01]
581.28	3	1740.81	0.0104	2	66.85	DAEQFKNADKDFSAR
436.212	4	1740.81	0.0116	2	52.74	DAEQFKNADKDFSAR
582.972	3	1745.87	0.0248	2	66.75	EKLEQEDATADELKK
878.43	2	1754.84	0.01	1	96.97	DGSPYVEVDYLNEKK
585.959	3	1754.84	0.0188	1	72.87	DGSPYVEVDYLNEKK
894.984	2	1787.93	0.0219	0	125.66	IINEPTAAAIAYGLDEK
596.992	3	1787.93	0.0224	0	81.16	IINEPTAAAIAYGLDEK
901.958	2	1801.89	0.0067	1	42.39	ALEKLEQEDATADELK
601.644	3	1801.89	0.0155	1	63.12	ALEKLEQEDATADELK
908.956	2	1815.96	-0.0647	0	47.21	IINEPTAAAIAYGLDEK	2 Methyl (I) [+14.02]
612.644	3	1834.9	0.0117	1	67.92	NQSAMNPLNTIFDAKR	Oxidation (M)
620.662	3	1858.95	0.0119	2	73.05	LEKLEQEDATADELKK
966.008	2	1929.99	0.0116	2	78.58	ALEKLEQEDATADELKK
644.346	3	1929.99	0.0281	2	86.96	ALEKLEQEDATADELKK
483.514	4	1929.99	0.0393	2	67.33	ALEKLEQEDATADELKK
487.007	4	1944.01	-0.0047	2	56.91	ALEKLEQEDATADELKK	Methyl (DE) [+14.02]
661.669	3	1981.97	0.019	1	63.35	LSSEEIQAMIKDAEQFK	Oxidation (M)
743.683	3	2227.97	0.0537	0	52.01	TTPSYVAFTEGER	Hex(1)HexNAc(3) (ST) [+771.29]
801.048	3	2400.1	0.0234	0	63.07	ATAGDTHLGGEDFDNNLLEHFK
601.04	4	2400.1	0.0323	0	39.14	ATAGDTHLGGEDFDNNLLEHFK
811.753	3	2432.21	0.0309	1	62.8	IINEPTAAAIAYGLDEKTEEER
821.397	3	2461.15	0.0221	0	75.91	VFTTVEDNQTTVMFPVYEGER
1239.58	2	2477.14	0.0132	0	124.15	VFTTVEDNQTTVMFPVYEGER	Oxidation (M)
826.734	3	2477.14	0.0366	0	97.65	VFTTVEDNQTTVMFPVYEGER	Oxidation (M)
847.724	3	2540.14	0.0083	0	67.24	SDLEAYLHTCEQSISAPELSMK	Oxidation (M); Ox (CFHMPWY) [+15.99]
859.44	3	2575.28	0.0225	0	116.3	SINPDEAVAYGAAVQAAVLTGQTSDK
907.771	3	2720.28	0.0158	1	56.78	SRVFTTVEDNQTTVMFPVYEGER	Oxidation (M)
1003.9	3	3008.66	0.0032	0	42.95	TADLLLLDVAPLSLGVAMQGDIFGVVLPR	Oxidation (M)
39	2::AGV14158.1	cytoplasmic protein, variant [Cryptococcus neoformans var. grubii H99]	568	60947	15	38
39	2::XP_012048239.1	cytoplasmic protein, variant [Cryptococcus neoformans var. grubii H99]	568	60947	15	38
39	2::AFR93749.2	cytoplasmic protein [Cryptococcus neoformans var. grubii H99]	568	68793	15	33.1
39	2::XP_012047840.1	cytoplasmic protein [Cryptococcus neoformans var. grubii H99]	568	68793	15	33.1
Peptide exp mz	Peptide exp z	Peptide calc mr	Peptide delta	Peptide Misscleav	Peptide Score	Peptide Sequence	Peptide var Modi
464.238	2	926.457	0.0043	0	69.21	ADSHASLAR
501.245	2	1000.46	0.0147	0	47.14	GSDTAFTFR
547.274	2	1092.52	0.0141	0	50.8	STSVQETWR
574.307	2	1146.59	0.0082	0	62.65	NLDLIDYPGK
578.288	2	1154.56	0.0048	0	46.65	QVNEENALQK	Gln->pyro-Glu (N-term Q) [-17.03]
613.301	2	1224.58	0.0065	0	71.47	YLVASEQMER
620.789	2	1239.56	0.0074	0	82.37	MSTSVQETWR	Oxidation (M)
621.302	2	1240.58	0.0135	0	85.08	YLVASEQMER	Oxidation (M)
674.84	2	1347.65	0.0155	0	49.29	EDPFAVNQAVMK
682.836	2	1363.64	0.0132	0	83.17	EDPFAVNQAVMK	Oxidation (M)
691.891	2	1381.76	0.0119	0	79.92	TIESSIVQHLQK
696.863	2	1391.7	0.0063	0	45.68	SDHLLDPETPLR
464.913	3	1391.7	0.0132	0	46.73	SDHLLDPETPLR
731.373	2	1460.73	0.0019	0	66.9	IGAVNNTPMQVSSK	Oxidation (M)
752.867	2	1503.72	0.0025	0	90.73	QLGVNMAQLMPDR	Oxidation (M); Ox_CMW (CMW) [+15.99]
766.897	2	1531.77	0.0131	0	44.1	AIGAVNNTPMQVSSK	Oxidation (M)
819.401	2	1636.78	0.0112	0	77.06	SDPSVAPVYTGMLER	Oxidation (M)
569.914	3	1706.7	0.0171	0	66.7	SHEEMMEVWNDLR	Oxidation (M); Ox_CMW (CMW) [+15.99]
899.416	2	1796.81	0.0065	0	106.71	SVQSAWATFDEWQSR
600.625	3	1798.83	0.0215	1	44.78	EKPELGPEAETGSDGGAR
611.669	3	1831.98	0.0058	1	36.56	NTAPHELKPSDILIER
459.009	4	1831.98	0.0264	1	75.08	NTAPHELKPSDILIER
731.706	3	2192.09	0.0059	1	25.49	YLVASEQMEREGPITQAVR	Oxidation (M)
39	2::AFR92890.1	methylenetetrahydrofolate reductase [Cryptococcus neoformans var. grubii H99]	173	70413	5	12.2
39	2::XP_012046943.1	methylenetetrahydrofolate reductase [Cryptococcus neoformans var. grubii H99]	173	70413	5	12.2
Peptide exp mz	Peptide exp z	Peptide calc mr	Peptide delta	Peptide Misscleav	Peptide Score	Peptide Sequence	Peptide var Modi
622.804	2	1243.58	0.0111	0	74.64	SEDEIVGWGPR
637.842	2	1273.67	0.0035	0	71.52	ILDNLGWSAASK
768.875	2	1535.73	0.009	0	75.73	SPAYGEIDGWGSGLK
574.634	3	1720.86	0.0162	0	58.88	VQHWTVGSQPAVDAAR
834.412	3	2500.21	0.0035	1	25.29	CPVPDSITSDLQPISSDDATVKR
39	1::ALBU_BOVIN	Serum albumin OS=Bos taurus OX=9913 GN=ALB PE=1 SV=4	96	71244	4	7.4
Peptide exp mz	Peptide exp z	Peptide calc mr	Peptide delta	Peptide Misscleav	Peptide Score	Peptide Sequence	Peptide var Modi
461.75	2	921.481	0.005	0	44.02	AEFVEVTK
653.364	2	1304.71	0.0048	0	31.36	HLVDEPQNLIK
722.333	2	1442.63	0.0159	0	82.05	YICDNQDTISSK
756.426	2	1510.84	0.0011	0	31.39	VPQVSTPTLVEVSR
39	2::AFR97558.1	pyruvate decarboxylase [Cryptococcus neoformans var. grubii H99]	74	68079	3	5.5
39	2::XP_012052124.1	pyruvate decarboxylase [Cryptococcus neoformans var. grubii H99]	74	68079	3	5.5
Peptide exp mz	Peptide exp z	Peptide calc mr	Peptide delta	Peptide Misscleav	Peptide Score	Peptide Sequence	Peptide var Modi
570.299	2	1138.59	-0.0034	0	38.04	SVDSPVVPDPK
641.803	2	1281.59	0.0039	0	44.08	TPTSWTEAFDK
497.579	3	1489.7	0.0114	1	42.32	LLDDEEFNKPDR

## Sheet: ID26329
Gel	Protein Accession	Protein Description	Protein Score	Protein Mass	Matched Peptides	Protein Coverage
37	2::AFR98550.2	phosphoglucomutase [Cryptococcus neoformans var. grubii H99]	1322	60675	30	74.9
37	2::XP_012053286.1	phosphoglucomutase [Cryptococcus neoformans var. grubii H99]	1322	60675	30	74.9
Peptide exp mz	Peptide exp z	Peptide calc mr	Peptide delta	Peptide Misscleav	Peptide Score	Peptide Sequence	Peptide var Modi
486.779	2	971.54	0.0045	0	73.75	STPAGSALIR
490.738	2	979.455	0.0074	0	61.99	FGNLMDAGR
493.267	2	984.503	0.0161	0	49.85	GEFTHGPLK
498.738	2	995.449	0.012	0	76.81	FGNLMDAGR	Oxidation (M)
528.279	2	1054.53	0.009	0	43.23	SIFDFDAIK
543.321	2	1084.62	0.0027	0	49.59	LSTPAGSALIR
366.874	3	1097.59	0.0124	0	34.57	IGEFTHGPLK
549.808	2	1097.59	0.0135	0	51.17	IGEFTHGPLK
564.275	2	1126.52	0.0136	0	53.79	FFGNLMDAGR
564.335	2	1126.63	0.0207	0	99.9	SPEATQIILR
572.276	2	1142.52	0.0192	0	91.08	FFGNLMDAGR	Oxidation (M)
580.268	2	1158.55	-0.0252	0	70.93	FFGNLMDAGR	Met->Tyr (M) [+32.02]
599.863	2	1197.71	0.0041	0	52.65	ILSTPAGSALIR
601.83	2	1201.64	0.0071	0	65.1	MPTSGAIDIVAK
609.832	2	1217.63	0.0165	0	104.2	MPTSGAIDIVAK	Oxidation (M)
419.236	3	1254.68	0.0036	0	38.66	QINLPDLDLSK
628.356	2	1254.68	0.0148	0	62.63	QINLPDLDLSK
635.384	2	1268.75	0.0089	0	66.14	AILSTPAGSALIR
637.865	2	1273.7	0.0117	0	109.41	FSPEATQIILR
645.346	2	1288.67	0.007	0	84.52	SMPTSGAIDIVAK
653.349	2	1304.66	0.0193	0	84.34	SMPTSGAIDIVAK	Oxidation (M)
661.34	2	1320.73	-0.061	0	55.88	SMPTSGAIDIVAK	Dimethyl:2H(4) (N-term) [+32.06]
667.342	2	1332.66	0.0104	0	77.18	SMPTSGAIDIVAK	Oxidation (M); Formyl (S) [+27.99]
681.365	2	1360.7	0.0132	0	64.2	GLEVFEVPTGWK
683.843	2	1365.67	0.0042	0	79.49	FDALNGVTGPYGR
689.359	2	1376.7	0.005	0	51.77	GLEVFEVPTGWK	Ox_CMW (CMW) [+15.99]
697.356	2	1392.69	0.0055	0	61.39	GLEVFEVPTGWK	DiOx (CFMPWY) [+31.99]
479.933	3	1436.77	0.0122	0	72.59	YFSPEATQIILR
719.4	2	1436.77	0.02	0	105.77	YFSPEATQIILR
733.389	2	1464.76	0.0021	0	60.37	YFSPEATQIILR	Formyl (N-term) [+27.99]
514.257	3	1539.74	0.0148	1	45.04	EKPGSGINDVLMQH	Oxidation (M)
776.834	2	1551.64	0.0089	0	86.69	ENIEFGAASDGDGDR
523.633	3	1567.87	0.0098	0	62.3	GQNAILSTPAGSALIR
784.947	2	1567.87	0.0118	0	86.21	GQNAILSTPAGSALIR
788.817	2	1575.6	0.0158	0	97.78	YDYEECESGPAEK
789.437	2	1576.86	0.0014	0	70.37	HVILGQNAILSTPAGS
796.812	2	1591.6	0.0118	0	62.89	YDYEECESGPAEK	Oxidation (E) [+15.99]
802.811	2	1603.63	-0.0276	0	50.73	YDYEECESGPAEK	Ethyl (D) [+28.03]
549.626	3	1645.85	0.0108	1	46.7	ERGLEVFEVPTGWK
840.444	2	1678.87	0.0059	0	94.21	TVLFDALNGVTGPYGR
844.983	2	1687.94	0.0113	0	88.2	VTIVDPVSNYIDLLK
881.5	2	1760.98	0.0066	0	51.61	HVILGQNAILSTPAGSAL
888.973	2	1775.92	0.01	0	30.06	PTVLFDALNGVTGPYGR
618.982	3	1853.91	0.0147	1	32.08	EKPGSGINDVLMQHWK	Oxidation (M)
932.934	2	1863.84	0.012	0	14.86	LSICGEESFGTGSDHIR
622.295	3	1863.84	0.0221	0	74.44	LSICGEESFGTGSDHIR
627.623	3	1879.84	0.0102	0	68.54	LSICGEESFGTGSDHIR	Oxidation (I) [+15.99]
941.534	2	1881.05	0.0018	0	65.53	DGVWAIVAWLAILAAANK
636.964	3	1907.85	0.0192	1	81.61	VEKENIEFGAASDGDGDR
659.673	3	1975.99	0.0078	0	56.64	GAFVTPSDSVAIIADWAEK
989.006	2	1975.99	0.0079	0	101.61	GAFVTPSDSVAIIADWAEK
677.734	3	2030.16	0.0159	0	78.95	HVILGQNAILSTPAGSALIR
700.358	3	2098.04	0.012	0	98.19	VMSHLSELFASSGFVGSSLK	Oxidation (M)
713.742	3	2138.19	0.0149	1	56.88	EKDGVWAIVAWLAILAAANK
734.314	3	2199.91	0.015	1	46.72	SFFSRYDYEECESGPAEK
759.009	3	2273.99	0.019	1	25.36	ENIEFGAASDGDGDRNMIYGK	Oxidation (M)
766.049	3	2295.11	0.0135	0	61.27	TDGGILLTASHNPGGPDNDFGIK
792.708	3	2375.08	0.0231	0	82.66	TDGGILLTASHNPGGPDNDFGIK	Phosphorylation (STY) [+79.97]
658.562	4	2630.19	0.029	2	42.12	VEKENIEFGAASDGDGDRNMIYGK	Oxidation (M)
901.467	3	2701.38	-0.0014	1	19.72	DESEYGNDAQVGLKPLIEVALNISK
935.45	3	2803.32	0.008	0	93.08	VAEADNFSYTDPIDGSVSTNQGLYIK
981.135	3	2940.38	0.0087	0	79.49	IFQQEHYTENFVQAIFSAMPGGPEGK	Oxidation (M)
736.105	4	2940.38	0.0158	0	31.85	IFQQEHYTENFVQAIFSAMPGGPEGK	Oxidation (M)
770.901	4	3079.57	0.0042	2	32.62	YSKDESEYGNDAQVGLKPLIEVALNISK
1050.87	3	3149.53	0.0511	1	45.07	VKIFQQEHYTENFVQAIFSAMPGGPEGK	Oxidation (M); Dehydrated (Y) [-18.01]
977.007	4	3903.99	0.005	2	24.7	SIFDFDAIKNWLHNTTPKPTVLFDALNGVTGPYGR
1123.55	4	4490.15	0.0212	0	23.5	AIFVEELGLPESSIQNCVPSPDFGGGHPDPNLTYAHELVER
37	2::AFR98239.1	phosphomevalonate kinase [Cryptococcus neoformans var. grubii H99]	372	59686	10	21.8
37	2::XP_012053077.1	phosphomevalonate kinase [Cryptococcus neoformans var. grubii H99]	372	59686	10	21.8
Peptide exp mz	Peptide exp z	Peptide calc mr	Peptide delta	Peptide Misscleav	Peptide Score	Peptide Sequence	Peptide var Modi
452.713	2	903.409	0.0036	0	61.61	ADEVWER
502.267	2	1002.52	0.003	0	52.89	LLDACGQVK
622.852	2	1243.68	0.0114	0	64.24	EQLTSLSLPTR
701.356	2	1400.69	0.0122	0	33.94	EMSDLSGVPIEPK
709.353	2	1416.68	0.011	0	66.41	EMSDLSGVPIEPK	Oxidation (M)
713.896	2	1425.78	0.0015	0	45.04	VLEYVYESILAK
716.369	2	1430.71	0.0085	0	67.21	VGDEETALDELIK
752.299	2	1502.57	0.0108	0	87.24	DMVDAEGESDYEK	Oxidation (M)
529.948	3	1586.82	0.0076	1	57.11	VGDEETALDELIKR
542.292	3	1623.85	0.0071	0	47.38	PSTASTSLLDALHPSK
914.742	3	2741.19	0.0097	0	90.08	ATSGTSDIDGNTDTDTCQDEAIISVR
37	2::AFR95319.1	COP9 signalosome complex subunit 1 [Cryptococcus neoformans var. grubii H99]	254	62428	7	16.5
37	2::XP_012050236.1	COP9 signalosome complex subunit 1 [Cryptococcus neoformans var. grubii H99]	254	62428	7	16.5
Peptide exp mz	Peptide exp z	Peptide calc mr	Peptide delta	Peptide Misscleav	Peptide Score	Peptide Sequence	Peptide var Modi
472.756	2	943.497	0.0001	0	54.39	LIGDGDVGAK
536.315	2	1070.61	0.0069	0	48.11	AELAQASLLR
579.833	2	1157.64	0.0103	0	74.76	SAELAQASLLR
586.295	2	1170.57	0.0088	0	53.51	EALNYYAATR
674.351	2	1346.68	0.0088	0	88.74	QQAGLSTTASDLR
801.862	2	1601.71	0.0036	0	91.98	IQTMTQAFGMEEGK	2 Oxidation (M)
921.471	2	1840.92	0.0026	0	30.4	IDLIDNVLVMDTPDPR	Oxidation (M)
713.643	3	2137.9	0.0121	1	53.86	AAEEMEVDREDDEEGGITK	Oxidation (M)
37	2::AFR98435.1	heat shock 70kDa protein 4 [Cryptococcus neoformans var. grubii H99]	248	85923	9	15.4
37	2::XP_012053205.1	heat shock 70kDa protein 4 [Cryptococcus neoformans var. grubii H99]	248	85923	9	15.4
Peptide exp mz	Peptide exp z	Peptide calc mr	Peptide delta	Peptide Misscleav	Peptide Score	Peptide Sequence	Peptide var Modi
429.748	2	857.486	-0.0043	0	46.38	IDVLSSPK
552.806	2	1103.6	-0.0008	0	46.61	TPSLVSFTPR
578.341	2	1154.65	0.0119	0	32.28	VSVPLAEALEK
593.294	2	1184.57	0.006	0	53.32	ADLPESTEAPR
664.864	2	1327.71	0.0037	0	69.87	GIDIIVNEVSNR
686.826	2	1371.63	0.0065	0	47.86	NALEEYVYDTR
713.889	2	1425.76	0.0058	0	82.82	NVNPVITSAEINR
477.269	3	1428.78	0.0043	1	70.87	SVEKPASGDLSIVK
538.586	3	1612.73	0.0095	1	33.31	SFNDPEVEEYEKK
831.962	2	1661.9	0.0107	0	83.95	LINDNTAVALGYGITK
37	2::AFR97886.1	mitochondrial outer membrane 72K protein [Cryptococcus neoformans var. grubii H99]	232	69862	8	14.7
37	2::XP_012052684.1	mitochondrial outer membrane 72K protein [Cryptococcus neoformans var. grubii H99]	232	69862	8	14.7
Peptide exp mz	Peptide exp z	Peptide calc mr	Peptide delta	Peptide Misscleav	Peptide Score	Peptide Sequence	Peptide var Modi
506.745	2	1011.47	0.0085	0	47.35	TYPEFAER
518.268	2	1034.51	0.0069	0	36.52	ATAFENLNR
582.822	2	1163.62	0.0113	0	35.35	DFTAVTIIER
588.295	2	1174.57	0.0099	0	76.57	QDIAGAEALCK
668.82	2	1335.61	0.0194	0	87.62	FQDDQASAAVER
737.866	2	1473.71	0.0039	0	61.52	GQVYFITQEFDK
799.863	2	1597.71	0.0029	0	68.5	AACYGNLTPPDYEK
592.633	3	1774.87	0.0045	0	50.13	TEGELINAITYEHASK
37	2::AFR97558.1	pyruvate decarboxylase [Cryptococcus neoformans var. grubii H99]	187	68079	5	10.4
37	2::XP_012052124.1	pyruvate decarboxylase [Cryptococcus neoformans var. grubii H99]	187	68079	5	10.4
Peptide exp mz	Peptide exp z	Peptide calc mr	Peptide delta	Peptide Misscleav	Peptide Score	Peptide Sequence	Peptide var Modi
461.745	2	921.474	0.0005	0	41.87	FGMALEVR
469.743	2	937.469	0.0024	0	43.73	FGMALEVR	Oxidation (M)
486.732	2	971.442	0.0065	0	56	FFETPMGK	Oxidation (M)
570.304	2	1138.59	0.0067	0	59.15	SVDSPVVPDPK
640.288	2	1278.55	0.0172	0	62.27	HPLYGGCYAGAN
641.805	2	1281.59	0.0077	0	70.7	TPTSWTEAFDK
807.379	2	1612.74	0.0067	0	83.49	SDFNSGSFSVNIDPK
37	2::AGV14158.1	cytoplasmic protein, variant [Cryptococcus neoformans var. grubii H99]	162	60947	6	12.4
37	2::AFR93749.2	cytoplasmic protein [Cryptococcus neoformans var. grubii H99]	162	68793	6	10.8
37	2::XP_012047840.1	cytoplasmic protein [Cryptococcus neoformans var. grubii H99]	162	68793	6	10.8
37	2::XP_012048239.1	cytoplasmic protein, variant [Cryptococcus neoformans var. grubii H99]	162	60947	6	12.4
Peptide exp mz	Peptide exp z	Peptide calc mr	Peptide delta	Peptide Misscleav	Peptide Score	Peptide Sequence	Peptide var Modi
501.242	2	1000.46	0.0077	0	53.91	GSDTAFTFR
574.309	2	1146.59	0.0121	0	54.09	NLDLIDYPGK
621.299	2	1240.58	0.0074	0	68.59	YLVASEQMER	Oxidation (M)
682.832	2	1363.64	0.0045	0	66.07	EDPFAVNQAVMK	Oxidation (M)
464.913	3	1391.7	0.0114	0	64.4	SDHLLDPETPLR
819.4	2	1636.78	0.009	0	36.35	SDPSVAPVYTGMLER	Oxidation (M)
37	2::AFR92468.1	hsp75-like protein [Cryptococcus neoformans var. grubii H99]	161	67372	4	8
37	2::XP_012046659.1	hsp75-like protein [Cryptococcus neoformans var. grubii H99]	161	67372	4	8
Peptide exp mz	Peptide exp z	Peptide calc mr	Peptide delta	Peptide Misscleav	Peptide Score	Peptide Sequence	Peptide var Modi
584.31	2	1166.6	0.0091	0	64.26	FEEINAVAFK
615.842	2	1229.66	0.0073	0	77.68	VDDIVLVGGSTR
729.352	2	1456.68	0.0062	0	77.38	TTPSYVAFTEGER
783.901	2	1565.78	0.0028	0	59.09	AVVTVPAYFNDSQR
37	2::AFR97952.1	hsp72-like protein [Cryptococcus neoformans var. grubii H99]	125	69698	3	6.4
37	2::XP_012052733.1	hsp72-like protein [Cryptococcus neoformans var. grubii H99]	125	69698	3	6.4
37	2::AFR97929.1	hsp71-like protein [Cryptococcus neoformans var. grubii H99]	125	69759	3	6.4
37	2::XP_012052712.1	hsp71-like protein [Cryptococcus neoformans var. grubii H99]	125	69759	3	6.4
Peptide exp mz	Peptide exp z	Peptide calc mr	Peptide delta	Peptide Misscleav	Peptide Score	Peptide Sequence	Peptide var Modi
709.382	2	1416.76	-0.0081	0	88.62	SSVNEIVLVGGSTR
743.851	2	1485.67	0.0143	0	49.96	TTPSYVAFNDSER
783.901	2	1565.78	0.0028	0	59.09	AVVTVPAYFNDSQR
37	2::AFR98912.2	hexokinase [Cryptococcus neoformans var. grubii H99]	157	61380	7	16.7
37	2::XP_012053621.1	hexokinase [Cryptococcus neoformans var. grubii H99]	157	61380	7	16.7
Peptide exp mz	Peptide exp z	Peptide calc mr	Peptide delta	Peptide Misscleav	Peptide Score	Peptide Sequence	Peptide var Modi
441.712	2	881.403	0.0059	0	46	YPNFADR
452.763	2	903.507	0.0056	0	44.7	IDYVGLPK
573.279	2	1144.54	0.0079	0	44.48	MSETPDQLASR	Met-loss+Acetyl (Protein N-term M) [-89.03]
591.812	2	1181.6	0.0055	0	48.58	ASIPAQVDPER
596.326	2	1190.63	0.0074	0	47.54	ESLFTLTPQR
439.23	3	1314.67	0.0012	0	63.67	TPGGVQTVYHTR
677.855	2	1353.69	0.0029	0	66.77	YESLFTLTPQR
472.557	3	1414.64	0.0136	0	41.89	TNDDIEFPHAEK
515.251	3	1542.73	0.0012	1	20.45	TNDDIEFPHAEKK
918.938	2	1835.86	0.0015	0	90.79	TGSGSAVLENGTNTGSTAGR
37	2::AFR97413.2	protein transporter SEC31 [Cryptococcus neoformans var. grubii H99]	125	154056	4	3.3
37	2::XP_012051953.1	protein transporter SEC31 [Cryptococcus neoformans var. grubii H99]	125	154056	4	3.3
Peptide exp mz	Peptide exp z	Peptide calc mr	Peptide delta	Peptide Misscleav	Peptide Score	Peptide Sequence	Peptide var Modi
511.273	2	1020.52	0.0074	0	48.01	GLDFNSIQK
631.319	2	1260.63	-0.0065	0	65.18	TVSTEQDVLNR
646.847	2	1291.68	0.0025	0	53.6	EIVSLQYGGGAAK
733.857	2	1465.69	0.0083	0	59.61	GMETVGGVAGLQMGK	2 Oxidation (M)
37	2::AFR92196.1	T-complex protein 1 subunit epsilon [Cryptococcus neoformans var. grubii H99]	107	60257	4	7.1
37	2::XP_012046498.1	T-complex protein 1 subunit epsilon [Cryptococcus neoformans var. grubii H99]	107	60257	4	7.1
Peptide exp mz	Peptide exp z	Peptide calc mr	Peptide delta	Peptide Misscleav	Peptide Score	Peptide Sequence	Peptide var Modi
452.242	2	902.464	0.0043	0	61.94	LGIDCLGR
469.726	2	937.439	-0.0026	0	54.28	FEDLTADK
602.829	2	1203.63	0.0097	0	77.55	VGGSLEDTSLVK
669.315	2	1336.61	0.0048	0	33.14	MLVIEECANSR
37	2::AFR94562.2	deoxyuridine 5~-triphosphate nucleotidohydrolase [Cryptococcus neoformans var. grubii H99]	106	73956	4	6.9
37	2::XP_012048586.1	deoxyuridine 5~-triphosphate nucleotidohydrolase [Cryptococcus neoformans var. grubii H99]	106	73956	4	6.9
Peptide exp mz	Peptide exp z	Peptide calc mr	Peptide delta	Peptide Misscleav	Peptide Score	Peptide Sequence	Peptide var Modi
497.312	2	992.602	0.0069	0	39.32	LPDIVPLAR
601.321	2	1200.62	0.0039	0	48.63	EIDSVPEITAK
674.33	2	1346.64	0.0097	0	61.73	LWDISSSADEPK
774.394	2	1546.76	0.0107	0	58.77	ISGSAWDTDLVAAGGK
37	1::ALBU_BOVIN	Serum albumin OS=Bos taurus OX=9913 GN=ALB PE=1 SV=4	56	71244	3	5.3
Peptide exp mz	Peptide exp z	Peptide calc mr	Peptide delta	Peptide Misscleav	Peptide Score	Peptide Sequence	Peptide var Modi
461.751	2	921.481	0.006	0	41.72	AEFVEVTK
582.317	2	1162.62	-0.0032	0	48.21	LVNELTEFAK
756.429	2	1510.84	0.0078	0	31.64	VPQVSTPTLVEVSR
Gel	Protein Accession	Protein Description	Protein Score	Protein Mass	Matched Peptides	Protein Coverage
39	2::AFR98550.2	phosphoglucomutase [Cryptococcus neoformans var. grubii H99]	602	60675	13	32.8
39	2::XP_012053286.1	phosphoglucomutase [Cryptococcus neoformans var. grubii H99]	602	60675	13	32.8
Peptide exp mz	Peptide exp z	Peptide calc mr	Peptide delta	Peptide Misscleav	Peptide Score	Peptide Sequence	Peptide var Modi
443.265	2	884.508	0.0069	0	53.74	TPAGSALIR
490.741	2	979.455	0.0137	0	62.32	FGNLMDAGR
498.743	2	995.449	0.0209	0	76.34	FGNLMDAGR	Oxidation (M)
528.276	2	1054.53	0.0043	0	42.81	SIFDFDAIK
549.801	2	1097.59	-0.0006	0	37.69	IGEFTHGPLK
564.272	2	1126.52	0.0069	0	78.86	FFGNLMDAGR
564.333	2	1126.63	0.0166	0	99.97	SPEATQIILR
572.272	2	1142.52	0.0118	0	97.32	FFGNLMDAGR	Oxidation (M)
601.833	2	1201.64	0.0133	0	97.44	MPTSGAIDIVAK
609.828	2	1217.63	0.0083	0	114.83	MPTSGAIDIVAK	Oxidation (M)
628.352	2	1254.68	0.0085	0	52.35	QINLPDLDLSK
629.341	2	1256.66	0.0072	0	47.56	SMPTSGAIDIVAK	Met->AspSA (M) [-32.01]
637.861	2	1273.7	0.0036	0	93.88	FSPEATQIILR
645.347	2	1288.67	0.0101	0	88.34	SMPTSGAIDIVAK
653.345	2	1304.66	0.0114	0	92	SMPTSGAIDIVAK	Oxidation (M)
681.36	2	1360.7	0.0034	0	62.95	GLEVFEVPTGWK
683.841	2	1365.67	0.0002	0	46.9	FDALNGVTGPYGR
697.357	2	1392.69	0.0061	0	48.94	GLEVFEVPTGWK	DiOx (CFMPWY) [+31.99]
479.931	3	1436.77	0.0061	0	65.99	YFSPEATQIILR
719.394	2	1436.77	0.008	0	95.86	YFSPEATQIILR
776.835	2	1551.64	0.012	0	49.18	ENIEFGAASDGDGDR
784.944	2	1567.87	0.0062	0	68.7	GQNAILSTPAGSALIR
788.816	2	1575.6	0.0129	0	106.52	YDYEECESGPAEK
789.439	2	1576.86	0.0066	0	53.27	HVILGQNAILSTPAGS
622.293	3	1863.84	0.0137	0	80.77	LSICGEESFGTGSDHIR
636.961	3	1907.85	0.0111	1	85.88	VEKENIEFGAASDGDGDR
700.361	3	2098.04	0.0221	0	33.41	VMSHLSELFASSGFVGSSLK	Oxidation (M)
658.56	4	2630.19	0.0188	2	41.8	VEKENIEFGAASDGDGDRNMIYGK	Oxidation (M)
39	2::AFR92468.1	hsp75-like protein [Cryptococcus neoformans var. grubii H99]	373	67372	11	22
39	2::XP_012046659.1	hsp75-like protein [Cryptococcus neoformans var. grubii H99]	373	67372	11	22
Peptide exp mz	Peptide exp z	Peptide calc mr	Peptide delta	Peptide Misscleav	Peptide Score	Peptide Sequence	Peptide var Modi
584.313	2	1166.6	0.0149	0	56.29	FEEINAVAFK
592.837	2	1183.66	0.0037	0	69.11	DAGAIAGLEVLR
614.824	2	1227.62	0.0118	0	56.66	VEIIANDQGNR
615.84	2	1229.66	0.0048	0	80.5	VDDIVLVGGSTR
632.829	2	1263.64	0.0062	0	66.08	LSSEEIQAMIK	Oxidation (M)
678.358	2	1354.69	0.0142	0	27.17	IQSLVSEYFGGR
697.876	2	1393.74	0.0019	1	19.96	ARFEEINAVAFK
465.589	3	1393.74	0.0093	1	59.28	ARFEEINAVAFK
729.352	2	1456.68	0.0055	0	61.67	TTPSYVAFTEGER
783.902	2	1565.78	0.0059	0	59.02	AVVTVPAYFNDSQR
644.338	3	1929.99	0.0033	2	54.4	ALEKLEQEDATADELKK
483.508	4	1929.99	0.0152	2	19.69	ALEKLEQEDATADELKK
826.724	3	2477.14	0.0069	0	94.04	VFTTVEDNQTTVMFPVYEGER	Oxidation (M)
39	2::AFR97952.1	hsp72-like protein [Cryptococcus neoformans var. grubii H99]	242	69698	8	16.5
39	2::XP_012052733.1	hsp72-like protein [Cryptococcus neoformans var. grubii H99]	242	69698	8	16.5
Peptide exp mz	Peptide exp z	Peptide calc mr	Peptide delta	Peptide Misscleav	Peptide Score	Peptide Sequence	Peptide var Modi
584.786	2	1167.56	0.0021	0	46.84	NPYNTVFDAK
585.831	2	1169.64	0.0072	0	65.18	DAGAIAGLDVLR
592.327	2	1182.64	-0.0002	0	37.82	FELSGIPPAPR
614.824	2	1227.62	0.0118	0	56.66	VEIIANDQGNR
709.392	2	1416.76	0.0116	0	113.9	SSVNEIVLVGGSTR
743.848	2	1485.67	0.007	0	64.58	TTPSYVAFNDSER
783.902	2	1565.78	0.0059	0	59.02	AVVTVPAYFNDSQR
559.25	3	1674.72	0.0052	0	45.85	ATAGDTHLGGEDFDNR
856.407	2	1710.8	-0.0041	0	21.82	NQVAMNPYNTVFDAK
864.414	2	1726.8	0.0155	0	54.6	NQVAMNPYNTVFDAK	Oxidation (M)
39	2::AFR97929.1	hsp71-like protein [Cryptococcus neoformans var. grubii H99]	240	69759	7	14.8
39	2::XP_012052712.1	hsp71-like protein [Cryptococcus neoformans var. grubii H99]	240	69759	7	14.8
Peptide exp mz	Peptide exp z	Peptide calc mr	Peptide delta	Peptide Misscleav	Peptide Score	Peptide Sequence	Peptide var Modi
584.786	2	1167.56	0.0021	0	46.84	NPYNTVFDAK
585.831	2	1169.64	0.0072	0	65.18	DAGAIAGLDVLR
614.824	2	1227.62	0.0118	0	56.66	VEIIANDQGNR
709.392	2	1416.76	0.0116	0	113.9	SSVNEIVLVGGSTR
743.848	2	1485.67	0.007	0	64.58	TTPSYVAFNDSER
783.902	2	1565.78	0.0059	0	59.02	AVVTVPAYFNDSQR
559.25	3	1674.72	0.0052	0	45.85	ATAGDTHLGGEDFDNR
856.407	2	1710.8	-0.0041	0	21.82	NQVAMNPYNTVFDAK
864.414	2	1726.8	0.0155	0	54.6	NQVAMNPYNTVFDAK	Oxidation (M)
39	1::HS71A_BOVIN	Heat shock 70 kDa protein 1A OS=Bos taurus OX=9913 GN=HSPA1A PE=1 SV=2	68	70500	3	5.9
39	1::HS71B_BOVIN	Heat shock 70 kDa protein 1B OS=Bos taurus OX=9913 GN=HSPA1B PE=2 SV=1	68	70470	3	5.9
Peptide exp mz	Peptide exp z	Peptide calc mr	Peptide delta	Peptide Misscleav	Peptide Score	Peptide Sequence	Peptide var Modi
592.327	2	1182.64	-0.0002	0	37.82	FELSGIPPAPR
614.824	2	1227.62	0.0118	0	56.66	VEIIANDQGNR
559.25	3	1674.72	0.0052	0	45.85	ATAGDTHLGGEDFDNR
39	2::AGV14869.1	hexokinase, variant [Cryptococcus neoformans var. grubii H99]	207	61380	6	16.9
39	2::AFR98912.2	hexokinase [Cryptococcus neoformans var. grubii H99]	207	61380	6	16.9
39	2::XP_012053621.1	hexokinase [Cryptococcus neoformans var. grubii H99]	207	61380	6	16.9
39	2::XP_012053803.1	hexokinase, variant [Cryptococcus neoformans var. grubii H99]	207	61380	6	16.9
Peptide exp mz	Peptide exp z	Peptide calc mr	Peptide delta	Peptide Misscleav	Peptide Score	Peptide Sequence	Peptide var Modi
441.711	2	881.403	0.0051	0	34.74	YPNFADR
452.762	2	903.507	0.0039	0	43.34	IDYVGLPK
573.279	2	1144.54	0.0064	0	49.2	MSETPDQLASR	Met-loss+Acetyl (Protein N-term M) [-89.03]
595.339	2	1188.65	0.0093	0	42.93	LSACGIAAIVSK
439.229	3	1314.67	-0.002	0	51.08	TPGGVQTVYHTR
677.858	2	1353.69	0.0078	0	75.43	YESLFTLTPQR
515.256	3	1542.73	0.0136	1	30.64	TNDDIEFPHAEKK
918.938	2	1835.86	0.0001	0	115.47	TGSGSAVLENGTNTGSTAGR
612.963	3	1835.86	0.005	0	44.88	TGSGSAVLENGTNTGSTAGR
39	2::AFR97558.1	pyruvate decarboxylase [Cryptococcus neoformans var. grubii H99]	74	68079	4	7.9
39	2::XP_012052124.1	pyruvate decarboxylase [Cryptococcus neoformans var. grubii H99]	74	68079	4	7.9
Peptide exp mz	Peptide exp z	Peptide calc mr	Peptide delta	Peptide Misscleav	Peptide Score	Peptide Sequence	Peptide var Modi
452.237	2	902.464	-0.0049	0	47.99	LVDACGIR
570.303	2	1138.59	0.0041	0	53.5	SVDSPVVPDPK
641.803	2	1281.59	0.0037	0	25.97	TPTSWTEAFDK
678.335	3	2031.98	-0.002	0	28.45	HPLYGGCYAGANSLPTVQK

## Sheet: ID26344
Gel	Protein Accession	Protein Description	Protein Score	Protein Mass	Matched Peptides	Protein Coverage
37	2::AFR95502.2	V-type proton ATPase catalytic subunit A [Cryptococcus neoformans var. grubii H99]	406	68545	12	25.7
37	2::XP_012049757.1	V-type proton ATPase catalytic subunit A [Cryptococcus neoformans var. grubii H99]	406	68545	12	25.7
Peptide exp mz	Peptide exp z	Peptide calc mr	Peptide delta	Peptide Misscleav	Peptide Score	Peptide Sequence	Peptide var Modi
522.243	2	1042.46	0.0073	0	59.96	DATSDIMFK	Oxidation (M)
523.279	2	1044.54	0.0085	0	47.04	NNPGFIDLR
652.316	2	1302.6	0.0177	0	63.57	NFVAFYDGSQR
685.346	2	1368.67	0.0104	0	57.49	ESATYPLFTGQR
721.397	2	1440.78	-0.0032	0	81.91	EQDLAEIVQLVGK
741.36	2	1480.7	0.0072	0	106.19	AIEANDMTFAQVR	Oxidation (M)
787.868	2	1573.74	-0.0204	0	37.52	FDALYNEIGETFR
530.286	3	1587.85	-0.0103	1	32.42	SALGESDKITLEVAR
858.408	2	1714.8	0.0035	0	45.89	FSNSDIIVYVGCGER
868.905	2	1735.79	0.0063	0	77.55	FESPNTQSEEEIQAK
885.428	2	1768.83	0.0074	0	118.2	LAEMPADSGYPAYLGAK	Oxidation (M)
696.665	3	2086.96	0.0112	1	31.09	MLKDDFLQQNGISEYDR	Oxidation (M)
37	2::AFR94027.1	D-lactate dehydrogenase [Cryptococcus neoformans var. grubii H99]	398	58490	11	27.4
37	2::XP_012048058.1	D-lactate dehydrogenase [Cryptococcus neoformans var. grubii H99]	398	58490	11	27.4
Peptide exp mz	Peptide exp z	Peptide calc mr	Peptide delta	Peptide Misscleav	Peptide Score	Peptide Sequence	Peptide var Modi
449.74	2	897.46	0.0067	0	44.23	APYIGYSK
455.226	2	908.424	0.0142	0	47.98	DNTGFDIK
482.27	2	962.507	0.0173	0	53.79	YDVSVPVGK
525.764	2	1049.51	0.0079	0	58.41	NETSIEVMK
553.299	2	1104.58	0.0082	1	53.46	RPTAMNVAVF
561.302	2	1120.57	0.0187	1	72.44	RPTAMNVAVF	Oxidation (M)
561.304	2	1120.58	0.0168	0	54.07	SLPSYEAVQK
600.332	2	1198.64	0.0075	0	96.27	IGGNVATNAGGLR
708.363	2	1414.71	0.0014	1	28.7	ADFTKPTEEHIK
472.585	3	1414.71	0.0237	1	45.13	ADFTKPTEEHIK
760.876	2	1519.73	0.0103	0	85.69	QGVLEGDGNPEGPIR	Gln->pyro-Glu (N-term Q) [-17.03]
769.395	2	1536.75	0.0224	0	120.21	QGVLEGDGNPEGPIR
528.597	3	1582.76	0.005	0	81.27	SCHIGGNVATNAGGLR
547.268	3	1638.83	-0.0436	0	56.66	GSCHIGGNVATNAGGLR	Asn->Xle (N) [-0.96]
547.608	3	1639.78	0.018	0	74.9	GSCHIGGNVATNAGGLR
551.295	3	1650.86	0.0023	0	47.78	NVAVFSLPSYEAVQK
826.443	2	1650.86	0.009	0	84.29	NVAVFSLPSYEAVQK
552.938	3	1655.78	0.0118	0	57.93	GSCHIGGNVATNAGGLR	Ox (CFHMPWY) [+15.99]
833.435	2	1664.85	0.0068	1	16.71	KQGVLEGDGNPEGPIR
555.961	3	1664.85	0.0116	1	73.91	KQGVLEGDGNPEGPIR
723.034	3	2166.06	0.0154	0	22.56	AVAGYGHMGDGNLHINIVANK	Oxidation (M)
542.529	4	2166.06	0.0238	0	36.72	AVAGYGHMGDGNLHINIVANK	Oxidation (M)
742.053	3	2223.14	0.003	1	38.2	RPTAMNVAVFSLPSYEAVQK	Oxidation (M)
983.828	3	2948.45	0.0152	0	22.31	VIEPYVYEIVAENEGSISAEHGLGVMK	Oxidation (M)
37	2::AFR98380.1	26S protease regulatory subunit 6A-B [Cryptococcus neoformans var. grubii H99]	352	52127	14	35.3
37	2::XP_012053170.1	26S protease regulatory subunit 6A-B [Cryptococcus neoformans var. grubii H99]	352	52127	14	35.3
Peptide exp mz	Peptide exp z	Peptide calc mr	Peptide delta	Peptide Misscleav	Peptide Score	Peptide Sequence	Peptide var Modi
397.212	2	792.402	0.0078	0	45	DAFELAK
489.735	2	977.445	0.0091	0	55.35	LPDEYDAR
569.847	2	1137.68	0.004	0	56.89	IDILDPALLR
627.291	2	1252.56	0.0088	0	86.46	GCLMYGPPGTGK	Oxidation (M)
635.286	2	1268.59	-0.0284	0	67.45	GCLMYGPPGTGK	Oxidation (M); Methyl:2H(2) (N-term) [+16.03]
653.339	2	1304.66	0.0052	0	71.93	AVCVEAGMLALR	Oxidation (M)
467.592	3	1399.75	0.0089	1	55.38	KIEFPLPNESAR
753.887	2	1505.75	0.0055	0	48.64	AGPALVQMYLGDGAK	Oxidation (M)
540.616	3	1618.84	-0.0127	0	25.51	LAGPALVQMYLGDGAK	Oxidation (M)
843.972	2	1685.92	0.0051	0	17.03	APAIIFIDELDAIGTK
637.987	3	1910.93	0.0119	1	54.22	DSYLVLDKLPDEYDAR
647.982	3	1940.91	0.0084	0	24.54	TMLELLNQLDGFSSDSR	Oxidation (M)
971.474	2	1940.91	0.0184	0	51.84	TMLELLNQLDGFSSDSR	Oxidation (M)
648.364	3	1942.08	-0.0083	1	59.75	QKAPAIIFIDELDAIGTK
752.689	3	2255.03	0.018	1	81.36	AMEVDERPTETYTDIGGLDK	Oxidation (M)
852.072	3	2553.18	0.0116	0	62.32	VVEILDVDSEEQEGATHNEQNAK
671.331	4	2681.28	0.0179	1	31.15	VVEILDVDSEEQEGATHNEQNAKK
37	2::AFR96040.1	alanine-tRNA ligase [Cryptococcus neoformans var. grubii H99]	243	112034	8	11.1
37	2::XP_012050473.1	alanine-tRNA ligase [Cryptococcus neoformans var. grubii H99]	243	112034	8	11.1
Peptide exp mz	Peptide exp z	Peptide calc mr	Peptide delta	Peptide Misscleav	Peptide Score	Peptide Sequence	Peptide var Modi
490.243	2	978.466	0.0066	0	56.94	IDQEAFEK
529.8	2	1057.58	0.0038	0	45.92	PLFLGTADPK
653.328	2	1304.63	0.0122	0	72.91	LYVTYFEGDAK
516.283	3	1545.82	0.0112	0	41.95	DLGVPESHILPGNAK
523.252	3	1566.72	0.019	1	92.7	LGDEDKDGIDTAYR
820.394	2	1638.76	0.0105	0	43.98	QGLEPDSEAQQIWR	Gln->pyro-Glu (N-term Q) [-17.03]
828.91	2	1655.79	0.016	0	104.85	QGLEPDSEAQQIWR
576.981	3	1727.91	0.0161	1	37.11	TLTIAISDGGIPDKDGR
861.453	3	2581.31	0.0309	0	45.95	LVSVLHNVSSNYDTDVFTPIFSK
37	2::AFR98550.2	phosphoglucomutase [Cryptococcus neoformans var. grubii H99]	232	60675	6	14.8
37	2::XP_012053286.1	phosphoglucomutase [Cryptococcus neoformans var. grubii H99]	232	60675	6	14.8
Peptide exp mz	Peptide exp z	Peptide calc mr	Peptide delta	Peptide Misscleav	Peptide Score	Peptide Sequence	Peptide var Modi
564.326	2	1126.63	0.0025	0	57.79	SPEATQIILR
572.278	2	1142.52	0.023	0	57.24	FFGNLMDAGR	Oxidation (M)
609.828	2	1217.63	0.0098	0	60.12	MPTSGAIDIVAK	Oxidation (M)
653.345	2	1304.66	0.0098	0	63.5	SMPTSGAIDIVAK	Oxidation (M)
719.39	2	1436.77	-0.0009	0	51.15	YFSPEATQIILR
788.81	2	1575.6	0.0018	0	90.19	YDYEECESGPAEK
622.296	3	1863.84	0.0238	0	56.96	LSICGEESFGTGSDHIR
636.962	3	1907.85	0.0142	1	63.54	VEKENIEFGAASDGDGDR
37	2::AFR97558.1	pyruvate decarboxylase [Cryptococcus neoformans var. grubii H99]	232	68079	7	16.5
37	2::XP_012052124.1	pyruvate decarboxylase [Cryptococcus neoformans var. grubii H99]	232	68079	7	16.5
Peptide exp mz	Peptide exp z	Peptide calc mr	Peptide delta	Peptide Misscleav	Peptide Score	Peptide Sequence	Peptide var Modi
452.238	2	902.464	-0.0035	0	46.74	LVDACGIR
469.745	2	937.469	0.0062	0	64.72	FGMALEVR	Oxidation (M)
570.304	2	1138.59	0.0058	0	77.48	SVDSPVVPDPK
640.284	2	1278.55	0.0092	0	74.98	HPLYGGCYAGAN
641.806	2	1281.59	0.0095	0	85.31	TPTSWTEAFDK
807.38	2	1612.74	0.0075	0	86.49	SDFNSGSFSVNIDPK
573.009	3	1715.99	0.0122	0	30.96	VPVLHIVGAPSTSLQAK
585.554	4	2338.17	0.0129	1	40.44	AVLEQCRPGYVEVPTDAVHAK
37	2::AFR97952.1	hsp72-like protein [Cryptococcus neoformans var. grubii H99]	230	69698	7	14.8
37	2::XP_012052733.1	hsp72-like protein [Cryptococcus neoformans var. grubii H99]	230	69698	7	14.8
37	2::AFR97929.1	hsp71-like protein [Cryptococcus neoformans var. grubii H99]	230	69759	7	14.8
37	2::XP_012052712.1	hsp71-like protein [Cryptococcus neoformans var. grubii H99]	230	69759	7	14.8
Peptide exp mz	Peptide exp z	Peptide calc mr	Peptide delta	Peptide Misscleav	Peptide Score	Peptide Sequence	Peptide var Modi
584.789	2	1167.56	0.0082	0	58.3	NPYNTVFDAK
585.83	2	1169.64	0.0055	0	62.52	DAGAIAGLDVLR
614.821	2	1227.62	0.0072	0	53.61	VEIIANDQGNR
709.39	2	1416.76	0.0079	0	93.71	SSVNEIVLVGGSTR
743.849	2	1485.67	0.0094	0	57.19	TTPSYVAFNDSER
783.905	2	1565.78	0.0108	0	45.98	AVVTVPAYFNDSQR
559.251	3	1674.72	0.0081	0	51.3	ATAGDTHLGGEDFDNR
864.41	2	1726.8	0.0066	0	87.26	NQVAMNPYNTVFDAK	Oxidation (M)
37	2::AFR92468.1	hsp75-like protein [Cryptococcus neoformans var. grubii H99]	187	67372	7	13.5
37	2::XP_012046659.1	hsp75-like protein [Cryptococcus neoformans var. grubii H99]	187	67372	7	13.5
Peptide exp mz	Peptide exp z	Peptide calc mr	Peptide delta	Peptide Misscleav	Peptide Score	Peptide Sequence	Peptide var Modi
510.773	2	1019.53	0.0034	0	53.4	EEINAVAFK
584.312	2	1166.6	0.0121	0	56.26	FEEINAVAFK
614.821	2	1227.62	0.0072	0	53.61	VEIIANDQGNR
615.841	2	1229.66	0.0049	0	82.25	VDDIVLVGGSTR
632.834	2	1263.64	0.0161	0	64.52	LSSEEIQAMIK	Oxidation (M)
678.354	2	1354.69	0.0045	0	51.61	IQSLVSEYFGGR
729.357	2	1456.68	0.0153	0	67.77	TTPSYVAFTEGER
783.905	2	1565.78	0.0108	0	45.98	AVVTVPAYFNDSQR
37	1::ALBU_BOVIN	Serum albumin OS=Bos taurus OX=9913 GN=ALB PE=1 SV=4	193	71244	10	18.8
Peptide exp mz	Peptide exp z	Peptide calc mr	Peptide delta	Peptide Misscleav	Peptide Score	Peptide Sequence	Peptide var Modi
395.241	2	788.464	0.0031	0	45	LVTDLTK
461.75	2	921.481	0.004	0	43.73	AEFVEVTK
582.324	2	1162.62	0.0108	0	50.32	LVNELTEFAK
653.366	2	1304.71	0.0083	0	45.19	HLVDEPQNLIK
722.328	2	1442.63	0.0069	0	84.53	YICDNQDTISSK
751.817	2	1501.61	0.0134	0	41.33	EYEATLEECCAK
756.432	2	1510.84	0.013	0	64.54	VPQVSTPTLVEVSR
518.894	3	1553.65	0.0138	0	16.77	DDPHACYSTVFDK
784.383	2	1566.74	0.0165	0	35.1	DAFLGSFLYEYSR
874.364	2	1746.7	0.0147	0	27.66	YNGVFQECCQAEDK
37	2::AFR97484.2	extracellular elastinolytic metalloproteinase [Cryptococcus neoformans var. grubii H99]	190	92066	4	8.7
37	2::XP_012051981.1	extracellular elastinolytic metalloproteinase [Cryptococcus neoformans var. grubii H99]	190	92066	4	8.7
Peptide exp mz	Peptide exp z	Peptide calc mr	Peptide delta	Peptide Misscleav	Peptide Score	Peptide Sequence	Peptide var Modi
716.838	2	1431.65	0.0124	0	56.55	MYIWDTATPYR	Oxidation (M)
750.361	2	1498.7	0.0103	0	55.3	YGFGPTLFPPTDTS
814.405	2	1626.79	0.0031	0	28.78	YGFGPTLFPPTDTSK
626.635	3	1876.87	0.0083	0	23.32	LGFDELSGNFQAYNFR
939.45	2	1876.87	0.0114	0	75.68	LGFDELSGNFQAYNFR
1030.14	3	3087.37	0.0244	0	114.1	GGDPVVCNAQDGSGYNNANFLTPPDGQAPR
1035.47	3	3103.37	0.0111	0	68	GGDPVVCNAQDGSGYNNANFLTPPDGQAPR	Oxidation (N) [+15.99]
37	2::AFR95155.1	homocitrate synthase, mitochondrial [Cryptococcus neoformans var. grubii H99]	185	53963	5	12.9
37	2::XP_012049240.1	homocitrate synthase, mitochondrial [Cryptococcus neoformans var. grubii H99]	185	53963	5	12.9
Peptide exp mz	Peptide exp z	Peptide calc mr	Peptide delta	Peptide Misscleav	Peptide Score	Peptide Sequence	Peptide var Modi
449.281	2	896.544	0.0028	0	47.12	TPLGGLIAR
487.715	2	973.414	0.0009	0	48.01	FSSEDSFR
574.836	2	1147.65	0.0076	0	56.83	TAIEVIEFVK
645.814	2	1289.6	0.0102	0	85.36	VGVADTVGCADAR
654.372	2	1306.71	0.0155	0	45.5	SELVDLLSIYR
735.339	2	1468.65	0.0094	0	77.59	TQSMEDVDMILR	2 Oxidation (M)
37	2::AFR94491.2	hypothetical protein CNAG_05236 [Cryptococcus neoformans var. grubii H99]	184	52430	6	18
37	2::XP_012048550.1	hypothetical protein CNAG_05236 [Cryptococcus neoformans var. grubii H99]	184	52430	6	18
Peptide exp mz	Peptide exp z	Peptide calc mr	Peptide delta	Peptide Misscleav	Peptide Score	Peptide Sequence	Peptide var Modi
458.229	3	1371.66	0.0081	0	79.95	NQLDQMTLTHR	Oxidation (M)
724.879	2	1447.74	0.0048	0	36.79	APDVMPIYNSVVK	Oxidation (M)
738.352	2	1474.68	0.0131	0	88.91	ETDLYNYAMALR	Oxidation (M)
778.374	2	1554.72	0.0153	0	59.28	ETPAIYCQIASMR	Oxidation (M)
611.313	3	1830.9	0.0188	1	21.1	EAEEEVGPSLKPIYDR
672.681	3	2015.01	0.008	0	52.23	LMSESEPISEELLPIANK	Oxidation (S) [+15.99]
37	2::AFR92273.1	ubiquitin-activating enzyme E1 [Cryptococcus neoformans var. grubii H99]	176	112989	4	6.2
37	2::XP_012046554.1	ubiquitin-activating enzyme E1 [Cryptococcus neoformans var. grubii H99]	176	112989	4	6.2
Peptide exp mz	Peptide exp z	Peptide calc mr	Peptide delta	Peptide Misscleav	Peptide Score	Peptide Sequence	Peptide var Modi
753.88	2	1505.74	0.0009	0	85.76	VVESMNIPEFTPK	Oxidation (M)
763.885	2	1525.74	0.0138	0	58.27	LQYENNYVNEIK
809.389	2	1616.76	0.006	0	79.22	DQVNANGTPFWSGPK
838.414	3	2512.21	0.0118	0	49.41	ANTQVVVPHLTESYSSSQDPPEK
37	2::AFR94513.1	catalase [Cryptococcus neoformans var. grubii H99]	149	56090	4	12
37	2::XP_012048806.1	catalase [Cryptococcus neoformans var. grubii H99]	149	56090	4	12
Peptide exp mz	Peptide exp z	Peptide calc mr	Peptide delta	Peptide Misscleav	Peptide Score	Peptide Sequence	Peptide var Modi
501.25	2	1000.49	-0.0002	0	58.64	SDGSFVYVK
729.391	2	1456.75	0.015	0	79.91	ISTVGPEAGAAETVR
979.957	2	1957.89	0.0088	0	67.09	VAAYTTETTDEDYVQPR
721.988	3	2162.93	0.0093	0	27.65	TAGEAPDFHSTDMWNAIER	Oxidation (M)
37	2::AFR93378.1	hypothetical protein CNAG_03878 [Cryptococcus neoformans var. grubii H99]	105	48023	3	8.1
37	2::XP_012047524.1	hypothetical protein CNAG_03878 [Cryptococcus neoformans var. grubii H99]	105	48023	3	8.1
Peptide exp mz	Peptide exp z	Peptide calc mr	Peptide delta	Peptide Misscleav	Peptide Score	Peptide Sequence	Peptide var Modi
655.342	2	1308.67	0.0027	0	56.41	IGFASVSSDASLR
673.832	2	1345.65	-0.0021	0	46.97	EVDVSIWDVER
677.859	2	1353.7	-0.0002	0	64.03	NALEPGQIWQAK
37	2::AGV15424.1	galactokinase, variant [Cryptococcus neoformans var. grubii H99]	100	48219	3	8.5
37	2::AFR93446.2	galactokinase [Cryptococcus neoformans var. grubii H99]	100	58992	3	6.9
37	2::XP_012047283.1	galactokinase [Cryptococcus neoformans var. grubii H99]	100	58992	3	6.9
37	2::XP_012047568.1	galactokinase, variant [Cryptococcus neoformans var. grubii H99]	100	48219	3	8.5
Peptide exp mz	Peptide exp z	Peptide calc mr	Peptide delta	Peptide Misscleav	Peptide Score	Peptide Sequence	Peptide var Modi
544.295	2	1086.57	0.0036	0	59.92	EVLGAWVGEK
484.597	3	1450.75	0.0172	0	47.79	ADVVQLAINSEHR
827.92	2	1653.82	0.01	0	65.79	FQEQFGEAPAYIVR
544.295	2	1086.57	0.0036	0	59.92	EVLGAWVGEK
484.597	3	1450.75	0.0172	0	47.79	ADVVQLAINSEHR
827.92	2	1653.82	0.01	0	65.79	FQEQFGEAPAYIVR
37	1::FETA_BOVIN	Alpha-fetoprotein OS=Bos taurus OX=9913 GN=AFP PE=2 SV=1	95	70368	5	9
Peptide exp mz	Peptide exp z	Peptide calc mr	Peptide delta	Peptide Misscleav	Peptide Score	Peptide Sequence	Peptide var Modi
483.231	2	964.429	0.0186	0	39.26	FTYEYSR
483.734	2	965.457	-0.0027	0	47.96	DFNQLSSR
695.329	2	1388.64	0.0079	0	52.25	GNVLECLQDGER
772.415	2	1542.81	0.0073	0	21.72	APQLTSPELMALTR
816.909	2	1631.8	0.0014	0	51.08	DLCQVQGVPLQTMK
37	2::AFR97093.2	ATP-dependent RNA helicase DBP5 [Cryptococcus neoformans var. grubii H99]	95	59752	3	7
37	2::XP_012051508.1	ATP-dependent RNA helicase DBP5 [Cryptococcus neoformans var. grubii H99]	95	59752	3	7
Peptide exp mz	Peptide exp z	Peptide calc mr	Peptide delta	Peptide Misscleav	Peptide Score	Peptide Sequence	Peptide var Modi
453.739	2	905.461	0.0029	0	52.09	DAILDGFR
550.349	2	1098.68	0.0074	0	45.44	VLITTNVIAR
560.351	2	1118.68	0.0057	0	52.25	LPLLLSNPPR
582.297	2	1162.57	0.0071	0	79.91	STTDIEQLEK
37	2::AFR95611.1	nucleolar protein 56 [Cryptococcus neoformans var. grubii H99]	66	63021	3	6.3
37	2::XP_012050017.1	nucleolar protein 56 [Cryptococcus neoformans var. grubii H99]	66	63021	3	6.3
Peptide exp mz	Peptide exp z	Peptide calc mr	Peptide delta	Peptide Misscleav	Peptide Score	Peptide Sequence	Peptide var Modi
640.342	2	1278.66	0.0082	0	31.59	LNFFETGAPVGK
655.319	2	1308.6	0.0211	0	44.37	IDCFTDVPTNK
688.879	2	1375.73	0.0086	0	43.81	YPASTVQILGAEK
Gel	Protein Accession	Protein Description	Protein Score	Protein Mass	Matched Peptides	Protein Coverage
39	2::AFR94027.1	D-lactate dehydrogenase [Cryptococcus neoformans var. grubii H99]	303	58490	9	19.9
39	2::XP_012048058.1	D-lactate dehydrogenase [Cryptococcus neoformans var. grubii H99]	303	58490	9	19.9
Peptide exp mz	Peptide exp z	Peptide calc mr	Peptide delta	Peptide Misscleav	Peptide Score	Peptide Sequence	Peptide var Modi
449.739	2	897.46	0.0046	0	46.82	APYIGYSK
455.223	2	908.424	0.0078	0	46.57	DNTGFDIK
472.264	2	942.502	0.0104	0	61.86	ELIPESAGK
482.265	2	962.507	0.0085	0	54.18	YDVSVPVGK
525.761	2	1049.51	0.0008	0	54.48	NETSIEVMK
533.763	2	1065.5	0.0101	0	52.42	NETSIEVMK	Oxidation (M)
561.296	2	1120.57	0.0081	1	76.34	RPTAMNVAVF	Oxidation (M)
561.3	2	1120.58	0.0094	0	58.97	SLPSYEAVQK
600.332	2	1198.64	0.007	0	89.95	IGGNVATNAGGLR
708.367	2	1414.71	0.0098	1	23.11	ADFTKPTEEHIK
472.582	3	1414.71	0.014	1	45.02	ADFTKPTEEHIK
760.875	2	1519.73	0.0093	0	85.34	QGVLEGDGNPEGPIR	Gln->pyro-Glu (N-term Q) [-17.03]
769.392	2	1536.75	0.0155	0	118.2	QGVLEGDGNPEGPIR
528.597	3	1582.76	0.0058	0	71.58	SCHIGGNVATNAGGLR
547.605	3	1639.78	0.0096	0	74.6	GSCHIGGNVATNAGGLR
826.445	2	1650.86	0.0141	0	64.95	NVAVFSLPSYEAVQK
552.938	3	1655.78	0.0126	0	63.01	GSCHIGGNVATNAGGLR	Ox (CFHMPWY) [+15.99]
555.96	3	1664.88	-0.027	0	61.99	QGVLEGDGNPEGPIR	spermidine (Q) [+128.13]
649.328	3	1944.95	0.0121	1	31.31	APYIGYSKNETSIEVMK	Oxidation (M)
39	2::AFR95502.2	V-type proton ATPase catalytic subunit A [Cryptococcus neoformans var. grubii H99]	203	68545	7	14.9
39	2::XP_012049757.1	V-type proton ATPase catalytic subunit A [Cryptococcus neoformans var. grubii H99]	203	68545	7	14.9
Peptide exp mz	Peptide exp z	Peptide calc mr	Peptide delta	Peptide Misscleav	Peptide Score	Peptide Sequence	Peptide var Modi
522.243	2	1042.46	0.0067	0	42.17	DATSDIMFK	Oxidation (M)
652.31	2	1302.6	0.0061	0	40.99	NFVAFYDGSQR
685.345	2	1368.67	0.0078	0	56.8	ESATYPLFTGQR
741.36	2	1480.7	0.0082	0	105.97	AIEANDMTFAQVR	Oxidation (M)
858.411	2	1714.8	0.0087	0	32.17	FSNSDIIVYVGCGER
868.907	2	1735.79	0.0084	0	62.53	FESPNTQSEEEIQAK
885.427	2	1768.83	0.0048	0	62.64	LAEMPADSGYPAYLGAK	Oxidation (M)
39	2::AFR97558.1	pyruvate decarboxylase [Cryptococcus neoformans var. grubii H99]	195	68079	5	10.4
39	2::XP_012052124.1	pyruvate decarboxylase [Cryptococcus neoformans var. grubii H99]	195	68079	5	10.4
Peptide exp mz	Peptide exp z	Peptide calc mr	Peptide delta	Peptide Misscleav	Peptide Score	Peptide Sequence	Peptide var Modi
469.743	2	937.469	0.0022	0	61.95	FGMALEVR	Oxidation (M)
486.731	2	971.442	0.0061	0	47.36	FFETPMGK	Oxidation (M)
570.303	2	1138.59	0.004	0	77.51	SVDSPVVPDPK
640.285	2	1278.55	0.0113	0	63.64	HPLYGGCYAGAN
641.806	2	1281.59	0.0104	0	88.44	TPTSWTEAFDK
807.379	2	1612.74	0.0074	0	60.96	SDFNSGSFSVNIDPK
39	2::AFR96040.1	alanine-tRNA ligase [Cryptococcus neoformans var. grubii H99]	188	112034	4	5.1
39	2::XP_012050473.1	alanine-tRNA ligase [Cryptococcus neoformans var. grubii H99]	188	112034	4	5.1
Peptide exp mz	Peptide exp z	Peptide calc mr	Peptide delta	Peptide Misscleav	Peptide Score	Peptide Sequence	Peptide var Modi
596.783	2	1191.54	0.0074	0	54.48	YVTYFEGDAK
653.325	2	1304.63	0.0062	0	74.56	LYVTYFEGDAK
487.929	3	1460.76	0.0037	1	26.63	IQELTGARPYEGK
523.25	3	1566.72	0.0117	1	88.56	LGDEDKDGIDTAYR
820.396	2	1638.76	0.013	0	72.91	QGLEPDSEAQQIWR	Gln->pyro-Glu (N-term Q) [-17.03]
828.906	2	1655.79	0.0077	0	95.14	QGLEPDSEAQQIWR
552.941	3	1655.79	0.0113	0	37.81	QGLEPDSEAQQIWR
39	2::AFR94513.1	catalase [Cryptococcus neoformans var. grubii H99]	173	56090	4	15.5
39	2::XP_012048806.1	catalase [Cryptococcus neoformans var. grubii H99]	173	56090	4	15.5
Peptide exp mz	Peptide exp z	Peptide calc mr	Peptide delta	Peptide Misscleav	Peptide Score	Peptide Sequence	Peptide var Modi
501.251	2	1000.49	0.0015	0	40.07	SDGSFVYVK
729.387	2	1456.75	0.0071	0	71.06	ISTVGPEAGAAETVR
783.339	2	1564.66	0.0019	0	27.99	YMTNYGGDPNYVR	Oxidation (M)
653.638	3	1957.89	0.0022	0	51.43	VAAYTTETTDEDYVQPR
979.954	2	1957.89	0.0036	0	88.42	VAAYTTETTDEDYVQPR
851.754	3	2552.24	-0.0024	1	54.35	TEKTPTYTLSEGCPIADATTAQR	Trimethyl (K) [+42.05]
39	2::AFR92273.1	ubiquitin-activating enzyme E1 [Cryptococcus neoformans var. grubii H99]	118	112989	4	6.2
39	2::XP_012046554.1	ubiquitin-activating enzyme E1 [Cryptococcus neoformans var. grubii H99]	118	112989	4	6.2
Peptide exp mz	Peptide exp z	Peptide calc mr	Peptide delta	Peptide Misscleav	Peptide Score	Peptide Sequence	Peptide var Modi
753.881	2	1505.74	0.0043	0	90.21	VVESMNIPEFTPK	Oxidation (M)
763.88	2	1525.74	0.004	0	43.26	LQYENNYVNEIK
809.39	2	1616.76	0.0078	0	35.21	DQVNANGTPFWSGPK
838.415	3	2512.21	0.0139	0	24.58	ANTQVVVPHLTESYSSSQDPPEK
39	2::AFR97929.1	hsp71-like protein [Cryptococcus neoformans var. grubii H99]	117	69759	6	13.1
39	2::AFR97952.1	hsp72-like protein [Cryptococcus neoformans var. grubii H99]	117	69698	6	13.1
39	2::XP_012052712.1	hsp71-like protein [Cryptococcus neoformans var. grubii H99]	117	69759	6	13.1
39	2::XP_012052733.1	hsp72-like protein [Cryptococcus neoformans var. grubii H99]	117	69698	6	13.1
Peptide exp mz	Peptide exp z	Peptide calc mr	Peptide delta	Peptide Misscleav	Peptide Score	Peptide Sequence	Peptide var Modi
585.84	2	1169.64	0.024	0	43.34	DAGAIAGLDVLR
709.389	2	1416.76	0.0069	0	64.8	SSVNEIVLVGGSTR
743.847	2	1485.67	0.0052	0	45.52	TTPSYVAFNDSER
783.902	2	1565.78	0.006	0	30.16	AVVTVPAYFNDSQR
559.252	3	1674.72	0.0111	0	45.09	ATAGDTHLGGEDFDNR
864.41	2	1726.8	0.0075	0	42.63	NQVAMNPYNTVFDAK	Oxidation (M)
585.84	2	1169.64	0.024	0	43.34	DAGAIAGLDVLR
709.389	2	1416.76	0.0069	0	64.8	SSVNEIVLVGGSTR
743.847	2	1485.67	0.0052	0	45.52	TTPSYVAFNDSER
783.902	2	1565.78	0.006	0	30.16	AVVTVPAYFNDSQR
559.252	3	1674.72	0.0111	0	45.09	ATAGDTHLGGEDFDNR
864.41	2	1726.8	0.0075	0	42.63	NQVAMNPYNTVFDAK	Oxidation (M)
39	2::AFR92468.1	hsp75-like protein [Cryptococcus neoformans var. grubii H99]	86	67372	5	13.7
39	2::XP_012046659.1	hsp75-like protein [Cryptococcus neoformans var. grubii H99]	86	67372	5	13.7
Peptide exp mz	Peptide exp z	Peptide calc mr	Peptide delta	Peptide Misscleav	Peptide Score	Peptide Sequence	Peptide var Modi
592.334	2	1182.67	-0.0184	0	44.43	DAGAIAGLEVLR	Amidated (C-term) [-0.98]
615.843	2	1229.66	0.0102	0	68.73	VDDIVLVGGSTR
678.351	2	1354.69	-0.0012	0	36.65	IQSLVSEYFGGR
729.355	2	1456.68	0.0114	0	28.33	TTPSYVAFTEGER
783.902	2	1565.78	0.006	0	30.16	AVVTVPAYFNDSQR
826.726	3	2477.14	0.0144	0	28.75	VFTTVEDNQTTVMFPVYEGER	Oxidation (M)
39	2::AFR95155.1	homocitrate synthase, mitochondrial [Cryptococcus neoformans var. grubii H99]	100	53963	4	8.8
39	2::XP_012049240.1	homocitrate synthase, mitochondrial [Cryptococcus neoformans var. grubii H99]	100	53963	4	8.8
Peptide exp mz	Peptide exp z	Peptide calc mr	Peptide delta	Peptide Misscleav	Peptide Score	Peptide Sequence	Peptide var Modi
487.716	2	973.414	0.0034	0	47.53	FSSEDSFR
607.778	2	1213.54	0.006	0	29.17	MMVADPEYVK	2 Oxidation (M)
645.813	2	1289.6	0.009	0	57.57	VGVADTVGCADAR
735.337	2	1468.65	0.0054	0	55.09	TQSMEDVDMILR	Oxidation (M); Ox_CMW (CMW) [+15.99]
39	1::ALBU_BOVIN	Serum albumin OS=Bos taurus OX=9913 GN=ALB PE=1 SV=4	87	71244	3	5.6
Peptide exp mz	Peptide exp z	Peptide calc mr	Peptide delta	Peptide Misscleav	Peptide Score	Peptide Sequence	Peptide var Modi
582.32	2	1162.62	0.0015	0	41.55	LVNELTEFAK
722.328	2	1442.63	0.0073	0	80.72	YICDNQDTISSK
751.812	2	1501.61	0.0029	0	22.88	EYEATLEECCAK
39	2::AFR98380.1	26S protease regulatory subunit 6A-B [Cryptococcus neoformans var. grubii H99]	72	52127	4	10.3
39	2::XP_012053170.1	26S protease regulatory subunit 6A-B [Cryptococcus neoformans var. grubii H99]	72	52127	4	10.3
Peptide exp mz	Peptide exp z	Peptide calc mr	Peptide delta	Peptide Misscleav	Peptide Score	Peptide Sequence	Peptide var Modi
397.21	2	792.402	0.0034	0	49.37	DAFELAK
489.729	2	977.445	-0.0011	0	37.89	LPDEYDAR
569.842	2	1137.68	-0.007	0	24.73	IDILDPALLR
852.071	3	2553.18	0.0086	0	49.05	VVEILDVDSEEQEGATHNEQNAK

## Sheet: ID26409
Gel	Protein Accession	Protein Description	Protein Score	Protein Mass	Matched Peptides	Protein Coverage
37	2::AFR97763.1	chlorophyll synthesis pathway protein BchC [Cryptococcus neoformans var. grubii H99]	2935	38489	21	73.4
37	2::XP_012052598.1	chlorophyll synthesis pathway protein BchC [Cryptococcus neoformans var. grubii H99]	2935	38489	21	73.4
Peptide exp mz	Peptide exp z	Peptide calc mr	Peptide delta	Peptide Misscleav	Peptide Score	Peptide Sequence	Peptide var Modi
383.182	2	764.345	0.0037	0	44.3	GFDVGDR
383.233	2	764.443	0.0091	1	42.61	KFEITK
383.723	2	765.417	0.0131	0	52.44	FPLVPGH
411.721	2	821.414	0.013	0	54.48	PGHEAVGR
416.754	2	831.489	0.0054	0	45.05	ILAQLMK	Oxidation (M)
439.247	2	876.471	0.0096	0	46.69	LLYSEPR
461.251	2	920.483	0.0045	0	66.25	VPGHEAVGR
466.26	2	930.502	0.0028	0	43.61	AIDLLDSGK
486.304	2	970.581	0.0119	0	56.11	ITIAANAGIK
493.244	2	984.455	0.0182	0	56.75	DGGFADYIK
505.817	2	1009.62	0.0022	0	81.98	VLLIGAGPTGL
517.8	2	1033.57	0.0186	0	52.23	LVPGHEAVGR
562.364	2	1122.7	0.012	0	45.17	VLLIGAGPTGLI
566.327	2	1130.62	0.0203	0	75.94	PLVPGHEAVGR
377.888	3	1130.62	0.0229	0	60.83	PLVPGHEAVGR
571.787	2	1141.56	0.0042	0	52.29	MGGASHITIAAN
578.259	2	1154.49	0.0128	0	46.46	IAADVGETCGY
579.786	2	1157.55	0.0072	0	61.84	MGGASHITIAAN	Oxidation (M)
603.279	2	1204.53	0.0105	0	77.72	FSQTYCFPR
603.808	2	1205.59	0.0078	0	75.13	PLSDYQGALDK
639.862	2	1277.69	0.0214	0	80.29	FPLVPGHEAVGR
426.913	3	1277.69	0.0283	0	73.9	FPLVPGHEAVGR
652.821	2	1303.62	0.0045	0	72.93	EMNALLYSEPR	Glu->pyro-Glu (N-term E) [-18.01]
653.853	2	1305.68	0.0077	0	79.48	FPLVPGHEAVGR	Formyl (N-term) [+27.99]
660.82	2	1319.62	0.008	0	77.58	EMNALLYSEPR	Oxidation (M); Glu->pyro-Glu (N-term E) [-18.01]
661.827	2	1321.63	0.0063	0	52.53	EMNALLYSEPR
664.886	2	1327.75	0.005	0	66.92	AGPTGLILAQLMK	Oxidation (M)
669.819	2	1337.62	0.0057	0	52.25	FCENFAPAGVAR
669.834	2	1337.63	0.0254	0	53.24	EMNALLYSEPR	Oxidation (M)
675.311	2	1348.59	0.0205	0	78.58	GSFSQTYCFPR
680.793	2	1359.55	0.0162	0	76.01	VDICGVCGTDQH
693.401	2	1384.77	0.0128	0	86.39	GAGPTGLILAQLMK	Oxidation (M)
696.849	2	1391.67	0.0116	0	70.89	GWSPTDIFVNEK
698.361	2	1394.71	0.0003	0	52.01	GGTLLVYGVYEDK	Dehydrated (T) [-18.01]
701.343	2	1400.67	0.0045	0	49.89	NLSDEEATLLEPA
704.842	2	1407.65	0.0171	0	109.97	VEAADEYIDLDR
707.369	2	1412.72	0.0036	0	78.69	GGTLLVYGVYEDK
471.916	3	1412.72	0.0072	0	45.32	GGTLLVYGVYEDK
718.453	2	1434.88	0.0099	0	85.32	VLLIGAGPTGLILAQ
726.802	2	1451.58	0.0075	0	96.87	IAADVGETCGYCH
731.775	2	1461.52	0.013	0	65.62	GETCGYCHYCR
731.849	2	1461.67	0.0128	0	82.97	IGSFSQTYCFPR
742.885	2	1483.75	0.0103	0	90.43	IIGSFSQTYCFPR	Cys->Dha (C) [-33.99]
745.377	2	1488.72	0.0144	0	65.28	PGWSPTDIFVNEK
749.938	2	1497.86	0.0033	0	85.49	IGAGPTGLILAQLMK	Oxidation (M)
504.608	3	1510.79	0.0092	0	49.01	MGGASHITIAANAGIK
506.923	3	1517.74	0.0105	1	51.6	KVEAADEYIDLDR	Dehydrated (Y) [-18.01]
506.97	3	1517.87	0.0188	0	72.48	VPVPEIGPEEVLLK
759.953	2	1517.87	0.022	0	110.64	VPVPEIGPEEVLLK
764.407	2	1526.79	0.0121	0	118.24	MGGASHITIAANAGIK	Oxidation (M)
509.943	3	1526.79	0.0206	0	74.71	MGGASHITIAANAGIK	Oxidation (M)
512.932	3	1535.75	0.0261	1	60.65	KVEAADEYIDLDR
768.894	2	1535.75	0.0267	1	127.03	KVEAADEYIDLDR
525.931	3	1574.76	0.0158	0	37.65	IIGSFSQTYCFPR
788.397	2	1574.76	0.0237	0	108.05	IIGSFSQTYCFPR
796.389	2	1590.75	0.0128	0	68.06	IIGSFSQTYCFPR	Ox (CFHMPWY) [+15.99]
801.923	2	1601.81	0.0234	0	86.08	LPGWSPTDIFVNEK
534.952	3	1601.81	0.0244	0	47.58	LPGWSPTDIFVNEK
803.914	2	1605.8	0.0101	0	66.63	LPGWSPTDIFVNEK	Trp->Kynurenin (W) [+3.99]
808.338	2	1614.64	0.0179	0	122.22	IAADVGETCGYCHY
540.278	3	1617.8	0.0068	0	47.31	LPGWSPTDIFVNEK	Ox_CMW (CMW) [+15.99]
817.912	2	1633.8	0.0101	0	68.78	LPGWSPTDIFVNEK	DiOx (CFMPWY) [+31.99]
824.408	2	1646.81	-0.0037	0	62.74	GTELFCENFAPAGVAR	Cys->Dha (C) [-33.99]
824.88	2	1647.73	0.0151	0	73.3	NLSDEEATLLEPASC
869.925	2	1737.81	0.021	0	123.19	GTELFCENFAPAGVAR
580.288	3	1737.81	0.0267	0	79.81	GTELFCENFAPAGVAR
874.345	2	1746.65	0.02	0	87.4	ADVGETCGYCHYCR
877.919	2	1753.81	0.0148	0	76.36	GTELFCENFAPAGVAR	Oxidation (E) [+15.99]
585.617	3	1753.81	0.0185	0	49.1	GTELFCENFAPAGVAR	Oxidation (E) [+15.99]
586.982	3	1757.92	-0.0005	0	50.75	LPGWSPTDIFVNEK	HNE (L) [+156.12]
587.311	3	1758.89	0.0155	1	68.82	LPGWSPTDIFVNEKR	Deamidated (NQ) [+0.98]
606.909	3	1817.69	0.0126	0	60.18	AADVGETCGYCHYCR
909.86	2	1817.69	0.0132	0	85.9	AADVGETCGYCHYCR
912.558	2	1823.1	0.0066	0	154.93	VLLIGAGPTGLILAQLMK	Oxidation (M)
608.711	3	1823.1	0.017	0	80.19	VLLIGAGPTGLILAQLMK	Oxidation (M)
610.661	3	1828.95	0.0147	1	42	ARLPGWSPTDIFVNEK
614.269	3	1839.77	0.0196	0	65.99	IAADVGETCGYCHYCR	Cys->Dha (C) [-33.99]
933.971	2	1865.91	0.0183	1	62.64	KGTELFCENFAPAGVAR
622.985	3	1865.91	0.0245	1	85.01	KGTELFCENFAPAGVAR
628.314	3	1881.9	0.0158	1	59.45	KGTELFCENFAPAGVAR	Oxidation (E) [+15.99]
966.403	2	1930.78	0.0158	0	112.54	IAADVGETCGYCHYCR
644.611	3	1930.78	0.034	0	70.86	IAADVGETCGYCHYCR
649.602	3	1945.78	0.0077	0	43.06	IAADVGETCGYCHYCR	Methylglyoxal (CHKR) [+72.02]
649.933	3	1946.77	0.0067	0	50.46	IAADVGETCGYCHYCR	Ox (CFHMPWY) [+15.99]
1079.53	2	2157.03	0.0078	0	85.69	TTGMVTDVFPLSDYQGALDK
720.022	3	2157.03	0.0139	0	71.4	TTGMVTDVFPLSDYQGALDK
1087.53	2	2173.02	0.0141	0	125.87	TTGMVTDVFPLSDYQGALDK	Oxidation (M)
725.357	3	2173.02	0.0239	0	76.44	TTGMVTDVFPLSDYQGALDK	Oxidation (M)
739.03	3	2214.05	0.0175	0	70.84	TTGMVTDVFPLSDYQGALDK	Carbamidomethyl (M) [+57.02]
795.714	3	2384.09	0.0315	0	79.09	VDICGVCGTDQHIHEGEFIAK
597.04	4	2384.09	0.044	0	49.95	VDICGVCGTDQHIHEGEFIAK
658.069	4	2628.24	0.0072	0	27.53	NLSDEEATLLEPASCAIHGMDVLK	Oxidation (M)
877.094	3	2628.24	0.0203	0	60.6	NLSDEEATLLEPASCAIHGMDVLK	Oxidation (M)
882.426	3	2644.24	0.0193	0	65.3	NLSDEEATLLEPASCAIHGMDVLK	Oxidation (M); Ox (CFHMPWY) [+15.99]
37	2::AFR97782.1	glutamate dehydrogenase (NADP) [Cryptococcus neoformans var. grubii H99]	666	49505	13	36.6
37	2::XP_012052614.1	glutamate dehydrogenase (NADP) [Cryptococcus neoformans var. grubii H99]	666	49505	13	36.6
Peptide exp mz	Peptide exp z	Peptide calc mr	Peptide delta	Peptide Misscleav	Peptide Score	Peptide Sequence	Peptide var Modi
450.734	2	899.446	0.0072	0	46.8	PAGDIGTGGR
499.243	2	996.47	0.0024	0	55.12	AFMQELSR	Oxidation (M)
503.732	2	1005.44	0.009	0	48.98	DLDNTDWK
508.772	2	1015.53	-0.0003	0	57.28	NENAGILTGK
564.812	2	1127.6	0.0086	0	51.42	FLGFEQIFK
570.333	2	1138.63	0.0174	0	56.23	ALDVVQIPER
581.787	2	1161.55	0.0073	0	53.59	EIGFMFGAYK
581.819	2	1161.61	0.0085	0	77.6	GAGNVAQYAALK
591.286	2	1180.56	-0.0012	0	62.52	NALTGLMMGGGK	Oxidation (M); Ox_CMW (CMW) [+15.99]
612.329	2	1222.63	0.0085	0	69.5	VQFNSALGPYK
625.334	2	1248.65	0.0067	0	77.33	SGAGNVAQYAALK
734.328	2	1466.63	0.01	0	80.86	FCYAFMQELSR	Oxidation (M)
735.843	2	1469.66	0.0104	0	110.44	NATDAGVCFYAPGK
525.634	3	1573.88	-0.0025	0	82.89	VLISGAGNVAQYAALK
787.954	2	1573.88	0.011	0	142.56	VLISGAGNVAQYAALK
580.285	3	1737.83	0.0054	0	60.13	HIGTDTDVPAGDIGTGGR
869.932	2	1737.83	0.0208	0	43.67	HIGTDTDVPAGDIGTGGR
872.905	2	1743.78	0.0146	0	143.35	YVAEGSNMGCTLDAIK	Oxidation (M)
880.896	2	1759.78	0.0028	0	62.57	YVAEGSNMGCTLDAIK	Oxidation (M); Oxidation (T) [+15.99]
679.321	3	2034.92	0.0205	0	131.73	AANCGGVAVSGLEMAQNSQR	Oxidation (M)
37	2::AFR92807.1	urease accessory protein UreG [Cryptococcus neoformans var. grubii H99]	263	33777	7	28.2
37	2::XP_012046883.1	urease accessory protein UreG [Cryptococcus neoformans var. grubii H99]	263	33777	7	28.2
Peptide exp mz	Peptide exp z	Peptide calc mr	Peptide delta	Peptide Misscleav	Peptide Score	Peptide Sequence	Peptide var Modi
477.706	2	953.391	0.0067	0	29.76	DMPDYTGR
482.25	2	962.486	-0.0007	0	96.72	VGASLDVMR	Oxidation (M)
514.792	2	1027.57	0.0025	0	57.5	TVGIGGPVGSGK
515.807	2	1029.6	-0.0006	0	55.68	TALLLALCR
525.273	2	1048.52	0.0129	0	67.46	EDQEFLIR
584.785	2	1167.55	0.0106	0	55.53	ETGGCPHAAIR
588.327	2	1174.63	0.0049	0	56.55	FTVGIGGPVGSGK
623.851	2	1245.67	0.016	0	72.76	AFTVGIGGPVGSGK
647.31	2	1292.59	0.0137	0	73.07	EDISANMGALEK	Oxidation (M)
676.842	2	1351.67	0.002	0	66.07	AIETGGCPHAAIR
451.565	3	1351.67	0.0078	0	51.99	AIETGGCPHAAIR
756.428	2	1510.84	0.0058	0	102	GGPGITQSDLLIVNK
37	1::ACT_CRYNH	Actin OS=Cryptococcus neoformans var. grubii serotype A (strain H99 / ATCC 208821 / CBS 10515 / FGSC 9487) OX=235443 GN=CNAG_00483 PE=3 SV=2	254	42089	5	17.6
37	2::AFR92615.2	actin [Cryptococcus neoformans var. grubii H99]	254	42307	5	17.5
37	2::XP_012046325.1	actin [Cryptococcus neoformans var. grubii H99]	254	42307	5	17.5
Peptide exp mz	Peptide exp z	Peptide calc mr	Peptide delta	Peptide Misscleav	Peptide Score	Peptide Sequence	Peptide var Modi
572.789	2	1143.56	0.0073	0	54.02	GYLFTTSAER
582.306	2	1162.59	0.0078	0	50.58	EITALAPSSMK	Oxidation (M)
492.566	3	1474.67	0.0069	0	72.15	SEYDESGPSIVHR
895.951	2	1789.88	0.0026	0	81.59	SYELPDGQVITIGNER
654.973	3	1961.88	0.0146	0	47.02	YPIEHGIVTNWDDMEK	Oxidation (M)
37	2::AFR98895.1	guanine nucleotide-binding protein subunit beta-like protein [Cryptococcus neoformans var. grubii H99]	254	34716	9	33.1
37	2::XP_012053792.1	guanine nucleotide-binding protein subunit beta-like protein [Cryptococcus neoformans var. grubii H99]	254	34716	9	33.1
Peptide exp mz	Peptide exp z	Peptide calc mr	Peptide delta	Peptide Misscleav	Peptide Score	Peptide Sequence	Peptide var Modi
518.255	2	1034.49	0.0091	0	38.33	VWELSNCK
541.769	2	1081.51	0.0144	0	50.66	EDNLYGFPK
544.319	2	1086.62	0.0052	0	60.7	TVIAWQLTR
560.781	2	1119.54	0.0084	0	52.95	LWNTLGECK
631.348	2	1260.67	0.0099	0	79.6	LWDLNTGLTTK
685.845	2	1369.67	0.0059	0	72.8	YWLCAATASSIK
754.364	2	1506.7	0.0118	0	79.86	DGITMLWDLNEGK	Oxidation (M)
882.424	2	1762.83	0.0068	0	76	SLVDDLQPDFDGLSDK
906.492	2	1810.96	0.0073	0	40.47	FSPNPALPVIISAGWDK
37	2::AFR95986.1	glyceraldehyde-3-phosphate dehydrogenase [Cryptococcus neoformans var. grubii H99]	206	36571	4	22.4
37	2::XP_012050787.1	glyceraldehyde-3-phosphate dehydrogenase [Cryptococcus neoformans var. grubii H99]	206	36571	4	22.4
Peptide exp mz	Peptide exp z	Peptide calc mr	Peptide delta	Peptide Misscleav	Peptide Score	Peptide Sequence	Peptide var Modi
410.725	2	819.424	0.0111	0	54.97	VGINGFGR	Deamidated (NQ) [+0.98]
565.321	2	1128.61	0.0134	0	46.35	ANIIPSSTGAAK
664.87	2	1327.71	0.0169	0	63.28	GAAANIIPSSTGAAK
446.574	3	1336.69	0.0124	1	52.18	GASYDEIKDVIK
770.389	2	1538.77	-0.0024	0	46.6	VCDLISYIAGVDAK	Oxidation (L) [+15.99]
773.407	2	1544.79	0.0121	0	120.92	VPTSDVSVVDLVCR
826.38	2	1650.73	0.0149	0	91.33	LVSWYDNEYGYSR
37	2::AFR95182.1	transketolase [Cryptococcus neoformans var. grubii H99]	129	74685	3	5.1
37	2::XP_012049657.1	transketolase [Cryptococcus neoformans var. grubii H99]	129	74685	3	5.1
Peptide exp mz	Peptide exp z	Peptide calc mr	Peptide delta	Peptide Misscleav	Peptide Score	Peptide Sequence	Peptide var Modi
596.806	2	1191.59	0.0053	0	74.73	AEAEWQALFK
667.854	2	1333.69	0.0064	0	55.78	LGNLVAIYDDNK
734.861	2	1467.7	0.0043	0	79.53	FGFNPEESFAVPK
37	2::AFR96057.2	hypothetical protein CNAG_05739 [Cryptococcus neoformans var. grubii H99]	128	37455	3	10.9
37	2::XP_012050353.1	hypothetical protein CNAG_05739 [Cryptococcus neoformans var. grubii H99]	128	37455	3	10.9
Peptide exp mz	Peptide exp z	Peptide calc mr	Peptide delta	Peptide Misscleav	Peptide Score	Peptide Sequence	Peptide var Modi
574.755	2	1147.49	0.007	0	92.71	FNDGGVDPDGR
470.906	3	1409.69	0.0066	0	42.62	SELHTLDPATGNR
741.357	2	1480.69	0.0054	0	57.69	EYDAVLDETLDAK
37	2::AFR98009.2	mannose-1-phosphate guanyltransferase [Cryptococcus neoformans var. grubii H99]	125	40211	4	11.8
37	2::XP_012052460.1	mannose-1-phosphate guanyltransferase [Cryptococcus neoformans var. grubii H99]	125	40211	4	11.8
Peptide exp mz	Peptide exp z	Peptide calc mr	Peptide delta	Peptide Misscleav	Peptide Score	Peptide Sequence	Peptide var Modi
538.785	2	1075.55	0.004	0	73.97	SISSSITEPR
552.331	2	1102.65	-0.0019	0	58.82	ALILVGGFGTR
583.79	2	1165.56	0.0064	0	76.32	CVIMSNATVR	Oxidation (M)
474.26	3	1419.75	0.007	1	34.73	FVEKPVEFVGNR
Gel	Protein Accession	Protein Description	Protein Score	Protein Mass	Matched Peptides	Protein Coverage
39	2::AFR97763.1	chlorophyll synthesis pathway protein BchC [Cryptococcus neoformans var. grubii H99]	2328	38489	20	69.6
39	2::XP_012052598.1	chlorophyll synthesis pathway protein BchC [Cryptococcus neoformans var. grubii H99]	2328	38489	20	69.6
Peptide exp mz	Peptide exp z	Peptide calc mr	Peptide delta	Peptide Misscleav	Peptide Score	Peptide Sequence	Peptide var Modi
411.72	2	821.414	0.0104	0	54.72	PGHEAVGR
439.244	2	876.471	0.0021	0	50.73	LLYSEPR
466.246	2	930.502	-0.0243	0	37.88	AIDLLDSGK
486.3	2	970.581	0.0042	0	49.42	ITIAANAGIK
493.244	2	984.455	0.0186	0	57.02	DGGFADYIK
505.817	2	1009.62	0.0018	0	51.64	VLLIGAGPTGL
529.744	2	1057.47	0.008	0	43.74	SQTYCFPR
566.322	2	1130.62	0.009	0	67.37	PLVPGHEAVGR
377.887	3	1130.62	0.0208	0	57.37	PLVPGHEAVGR
579.788	2	1157.55	0.012	0	71.09	MGGASHITIAAN	Oxidation (M)
596.284	2	1190.55	0.0035	0	55.75	CENFAPAGVAR
603.81	2	1205.59	0.0123	0	69.65	PLSDYQGALDK
605.303	2	1208.59	0.0051	0	75.4	MNALLYSEPR	Oxidation (M)
629.367	2	1256.72	0.0027	0	69.62	GPTGLILAQLMK	Oxidation (M)
639.856	2	1277.69	0.0094	0	60.11	FPLVPGHEAVGR
426.912	3	1277.69	0.025	0	68.11	FPLVPGHEAVGR
653.853	2	1305.68	0.0083	0	78.95	FPLVPGHEAVGR	Formyl (N-term) [+27.99]
660.819	2	1319.62	0.0051	0	72.48	EMNALLYSEPR	Oxidation (M); Glu->pyro-Glu (N-term E) [-18.01]
661.831	2	1321.63	0.0137	0	48.97	EMNALLYSEPR
669.308	2	1336.64	-0.043	0	62.73	EMNALLYSEPR	Hydroxamic_acid (DE) [+15.01]
669.319	2	1336.65	-0.0259	0	63.11	EMNALLYSEPR	Oxidation (M); Glu->pyro-Glu+Methyl:2H(2)13C(1) (N-term E) [-0.98]
669.822	2	1337.63	0.0013	0	54.24	EMNALLYSEPR	Oxidation (M)
675.308	2	1348.59	0.0144	0	78.61	GSFSQTYCFPR
677.823	2	1353.62	0.0088	0	57.1	EMNALLYSEPR	Oxidation (M); Ox (CFHMPWY) [+15.99]
683.819	2	1365.62	0.0004	0	65.21	EMNALLYSEPR	Oxidation (M); Formyl (N-term) [+27.99]
460.926	3	1379.75	0.0047	0	64.37	GGASHITIAANAGIK
693.397	2	1384.77	0.0039	0	88.69	GAGPTGLILAQLMK	Oxidation (M)
696.847	2	1391.67	0.0077	0	69.71	GWSPTDIFVNEK
698.363	2	1394.71	0.0039	0	68.02	GGTLLVYGVYEDK	Dehydrated (T) [-18.01]
704.837	2	1407.65	0.0079	0	114.59	VEAADEYIDLDR
471.914	3	1412.72	0.0015	0	35.63	GGTLLVYGVYEDK
707.376	2	1412.72	0.0187	0	92.02	GGTLLVYGVYEDK
721.369	2	1440.71	0.0094	0	73.54	GGTLLVYGVYEDK	Formyl (T) [+27.99]
731.848	2	1461.67	0.0099	0	70.19	IGSFSQTYCFPR
742.88	2	1483.75	-0.0008	0	88.01	IIGSFSQTYCFPR	Cys->Dha (C) [-33.99]
749.938	2	1497.86	0.0031	0	80.92	IGAGPTGLILAQLMK	Oxidation (M)
504.608	3	1510.79	0.0086	0	45.52	MGGASHITIAANAGIK
759.952	2	1517.87	0.0185	0	99.54	VPVPEIGPEEVLLK
506.971	3	1517.87	0.0208	0	65.75	VPVPEIGPEEVLLK
764.407	2	1526.79	0.0114	0	129.58	MGGASHITIAANAGIK	Oxidation (M)
509.943	3	1526.79	0.0189	0	81.54	MGGASHITIAANAGIK	Oxidation (M)
768.89	2	1535.75	0.0182	1	125.88	KVEAADEYIDLDR
512.932	3	1535.75	0.0283	1	56.07	KVEAADEYIDLDR
782.884	2	1563.74	0.0119	1	86.47	KVEAADEYIDLDR	Formyl (N-term) [+27.99]
788.389	2	1574.76	0.0086	0	92.93	IIGSFSQTYCFPR
796.388	2	1590.75	0.0121	0	51.8	IIGSFSQTYCFPR	Ox (CFHMPWY) [+15.99]
801.914	2	1601.81	0.0056	1	68.59	LPGWSPTDIFVNEKR	Arg-loss (C-term R) [-156.10]
534.949	3	1601.81	0.0152	0	46.36	LPGWSPTDIFVNEK
801.924	2	1601.81	0.0245	0	86.14	LPGWSPTDIFVNEK
803.911	2	1605.8	0.0032	0	56.7	LPGWSPTDIFVNEK	Trp->Kynurenin (W) [+3.99]
808.334	2	1614.64	0.0085	0	103.67	IAADVGETCGYCHY
817.912	2	1633.8	0.0113	0	77.28	LPGWSPTDIFVNEK	DiOx (CFMPWY) [+31.99]
547.633	3	1639.86	0.0211	1	40.12	GGTLLVYGVYEDKAR
824.409	2	1646.81	-0.0029	0	66.19	GTELFCENFAPAGVAR	Cys->Dha (C) [-33.99]
824.874	2	1647.73	0.0036	0	73.7	NLSDEEATLLEPASC
869.923	2	1737.81	0.0162	0	105.47	GTELFCENFAPAGVAR
580.285	3	1737.81	0.0203	0	78.29	GTELFCENFAPAGVAR
874.341	2	1746.65	0.0136	0	51.14	ADVGETCGYCHYCR
583.233	3	1746.65	0.0214	0	50.06	ADVGETCGYCHYCR
877.916	2	1753.81	0.0086	0	76.33	GTELFCENFAPAGVAR	Oxidation (E) [+15.99]
585.616	3	1753.81	0.0164	0	44.62	GTELFCENFAPAGVAR	Oxidation (E) [+15.99]
586.978	3	1757.92	-0.0124	0	50.5	LPGWSPTDIFVNEK	HNE (L) [+156.12]
883.914	2	1765.81	0.0043	0	98.49	GTELFCENFAPAGVAR	Formyl (T) [+27.99]
606.907	3	1817.69	0.0081	0	61.18	AADVGETCGYCHYCR
912.557	2	1823.1	0.004	0	124.09	VLLIGAGPTGLILAQLMK	Oxidation (M)
608.709	3	1823.1	0.0087	0	62.54	VLLIGAGPTGLILAQLMK	Oxidation (M)
610.659	3	1828.95	0.0067	1	38.69	ARLPGWSPTDIFVNEK
614.268	3	1839.77	0.0147	0	55.24	IAADVGETCGYCHYCR	Cys->Dha (C) [-33.99]
622.985	3	1865.91	0.0241	1	88.01	KGTELFCENFAPAGVAR
628.312	3	1881.9	0.0103	1	59.5	KGTELFCENFAPAGVAR	Oxidation (E) [+15.99]
966.405	2	1930.78	0.0192	0	90.85	IAADVGETCGYCHYCR
644.609	3	1930.78	0.0294	0	74.26	IAADVGETCGYCHYCR
649.275	3	1944.79	0.0128	0	56.55	IAADVGETCGYCHYCR	Propionamide (C) [+71.04]
1087.53	2	2173.02	0.0201	0	130.31	TTGMVTDVFPLSDYQGALDK	Oxidation (M)
725.36	3	2173.02	0.033	0	73.87	TTGMVTDVFPLSDYQGALDK	Oxidation (M)
1101.53	2	2201.02	0.0234	0	50.36	TTGMVTDVFPLSDYQGALDK	Oxidation (M); Formyl (T) [+27.99]
795.709	3	2384.09	0.0173	0	57.37	VDICGVCGTDQHIHEGEFIAK
597.04	4	2384.09	0.0422	0	46.69	VDICGVCGTDQHIHEGEFIAK
801.041	3	2400.1	-0.0011	0	48.3	VDICGVCGTDQHIHEGEFIAK	Asp->Met (D) [+16.01]
877.092	3	2628.24	0.0141	0	67.69	NLSDEEATLLEPASCAIHGMDVLK	Oxidation (M)
882.423	3	2644.24	0.0104	0	52.39	NLSDEEATLLEPASCAIHGMDVLK	Oxidation (M); Ox (CFHMPWY) [+15.99]
39	2::AFR97441.1	homoserine dehydrogenase [Cryptococcus neoformans var. grubii H99]	335	39776	10	32.8
39	2::XP_012052199.1	homoserine dehydrogenase [Cryptococcus neoformans var. grubii H99]	335	39776	10	32.8
Peptide exp mz	Peptide exp z	Peptide calc mr	Peptide delta	Peptide Misscleav	Peptide Score	Peptide Sequence	Peptide var Modi
446.764	2	891.507	0.0061	0	36.85	YVGVIDVK
524.755	2	1047.48	0.0115	0	46.49	DDLSGTDVAR
536.777	2	1071.52	0.0152	0	55.24	GFSASEALYK
591.809	2	1181.59	0.0107	0	71.35	GSDNIISFTTK
595.307	2	1188.59	0.0128	0	64.13	DLVATGDEIEK
597.389	2	1192.75	0.0094	0	93.57	IPVALLGLGGVGK
652.841	2	1303.66	0.0107	0	34.63	YPADHAFATALK
435.564	3	1303.66	0.0153	0	59.14	YPADHAFATALK
720.343	2	1438.67	-0.0005	0	109.84	LEEGDEFFANLR
480.565	3	1438.67	0.0003	0	48.47	LEEGDEFFANLR
632.977	3	1895.89	0.018	1	32.69	LEEGDEFFANLREEAK
655.31	3	1962.89	0.0157	1	29.33	GYTEPDPRDDLSGTDVAR
778.732	3	2333.16	0.0145	0	125.95	PLIIQGAGAGADVTAMGVTSDMVK	Oxidation (M); Ox_CMW (CMW) [+15.99]
39	2::AFR97929.1	hsp71-like protein [Cryptococcus neoformans var. grubii H99]	296	69759	8	17.1
39	2::AFR97952.1	hsp72-like protein [Cryptococcus neoformans var. grubii H99]	296	69698	8	17.1
39	2::XP_012052712.1	hsp71-like protein [Cryptococcus neoformans var. grubii H99]	296	69759	8	17.1
39	2::XP_012052733.1	hsp72-like protein [Cryptococcus neoformans var. grubii H99]	296	69698	8	17.1
Peptide exp mz	Peptide exp z	Peptide calc mr	Peptide delta	Peptide Misscleav	Peptide Score	Peptide Sequence	Peptide var Modi
585.829	2	1169.64	0.0027	0	59.56	DAGAIAGLDVLR
614.818	2	1227.62	0.0014	0	67.72	VEIIANDQGNR
709.389	2	1416.76	0.0056	0	118.35	SSVNEIVLVGGSTR
743.85	2	1485.67	0.0119	0	42.3	TTPSYVAFNDSER
783.902	2	1565.78	0.0054	0	56.76	AVVTVPAYFNDSQR
534.269	3	1599.78	0.0051	1	64.53	MKETAEAYLGGTVSK	Oxidation (M)
559.253	3	1674.72	0.0146	0	45.47	ATAGDTHLGGEDFDNR
864.409	2	1726.8	0.0057	0	105.84	NQVAMNPYNTVFDAK	Oxidation (M)
39	2::AFR93260.2	hypothetical protein CNAG_03755 [Cryptococcus neoformans var. grubii H99]	200	40158	5	17.4
39	2::XP_012047209.1	hypothetical protein CNAG_03755 [Cryptococcus neoformans var. grubii H99]	200	40158	5	17.4
Peptide exp mz	Peptide exp z	Peptide calc mr	Peptide delta	Peptide Misscleav	Peptide Score	Peptide Sequence	Peptide var Modi
432.71	2	863.396	0.0099	0	46.08	FANMPER
574.805	2	1147.59	0.0079	0	51.46	EELQQQVFK
765.864	2	1529.71	0.0063	0	93.31	GMLGLEDFEQTFK	Oxidation (M)
842.921	2	1683.83	-0.0017	0	62.13	LAYPEYYAGNIWPK
562.291	3	1683.83	0.0202	0	33.02	LAYPEYYAGNIWPK
1104	2	2205.99	0.004	0	46.24	GSYYANPLMDYPIVSDETR	Oxidation (M)
736.342	3	2205.99	0.0157	0	57.92	GSYYANPLMDYPIVSDETR	Oxidation (M)
39	2::AFR98895.1	guanine nucleotide-binding protein subunit beta-like protein [Cryptococcus neoformans var. grubii H99]	181	34716	6	23.9
39	2::XP_012053792.1	guanine nucleotide-binding protein subunit beta-like protein [Cryptococcus neoformans var. grubii H99]	181	34716	6	23.9
Peptide exp mz	Peptide exp z	Peptide calc mr	Peptide delta	Peptide Misscleav	Peptide Score	Peptide Sequence	Peptide var Modi
541.765	2	1081.51	0.0072	0	54.39	EDNLYGFPK
544.32	2	1086.62	0.0075	0	50.36	TVIAWQLTR
631.345	2	1260.67	0.0039	0	59.94	LWDLNTGLTTK
746.366	2	1490.71	0.0106	0	39.86	DGITMLWDLNEGK
754.36	2	1506.7	0.0034	0	79.57	DGITMLWDLNEGK	Oxidation (M)
882.424	2	1762.83	0.0067	0	61.34	SLVDDLQPDFDGLSDK
604.659	3	1810.96	-0.0063	0	47.79	FSPNPALPVIISAGWDK
906.494	2	1810.96	0.0111	0	40.85	FSPNPALPVIISAGWDK
39	2::AFR94883.2	hypothetical protein CNAG_06946 [Cryptococcus neoformans var. grubii H99]	174	39281	5	17
39	2::XP_012049004.1	hypothetical protein CNAG_06946 [Cryptococcus neoformans var. grubii H99]	174	39281	5	17
Peptide exp mz	Peptide exp z	Peptide calc mr	Peptide delta	Peptide Misscleav	Peptide Score	Peptide Sequence	Peptide var Modi
479.918	3	1436.71	0.0173	1	60.01	LTDEYKDADLVR
500.274	3	1497.78	0.0163	0	55.52	TEVHPSGAIVVFDK
824.398	2	1646.77	0.0085	0	53.45	IQCVPESPDSFVNR
592.635	3	1774.87	0.015	1	35.96	IQCVPESPDSFVNRK
672.346	3	2014.01	0.0007	0	50.7	TSSPILYILYPESETSSK
1008.02	2	2014.01	0.0118	0	51.91	TSSPILYILYPESETSSK
39	2::AFR92474.1	3~(2~),5~-bisphosphate nucleotidase [Cryptococcus neoformans var. grubii H99]	153	38891	7	26
39	2::XP_012047050.1	3~(2~),5~-bisphosphate nucleotidase [Cryptococcus neoformans var. grubii H99]	153	38891	7	26
Peptide exp mz	Peptide exp z	Peptide calc mr	Peptide delta	Peptide Misscleav	Peptide Score	Peptide Sequence	Peptide var Modi
509.285	2	1016.55	0.0061	0	55.46	NVQDTLVTK
535.302	2	1068.58	0.0081	0	64.87	IGEEIIPNGK
535.794	2	1069.57	0.0071	0	52.9	IGEEIIPNGK	Deamidated (NQ) [+0.98]
566.822	2	1131.63	0.0014	0	53.45	VIGLVNGGFEK
614.869	2	1227.72	0.0041	0	61.56	ETQIGILSVLR
855.931	2	1709.84	0.0062	0	65.69	FWTIDPVDGTSGFIR
585.624	3	1753.83	0.0228	1	30.99	GEGSWSRPLDSATYTK
1055.99	2	2109.97	0.005	0	17.64	TFSEEDILSAIDAGSAEGGNK
39	2::AFR98337.1	hypothetical protein CNAG_06113 [Cryptococcus neoformans var. grubii H99]	140	36583	3	12.8
39	2::XP_012053143.1	hypothetical protein CNAG_06113 [Cryptococcus neoformans var. grubii H99]	140	36583	3	12.8
Peptide exp mz	Peptide exp z	Peptide calc mr	Peptide delta	Peptide Misscleav	Peptide Score	Peptide Sequence	Peptide var Modi
580.27	2	1158.52	0.007	0	48.7	SYEEYLAER
862.874	2	1723.73	0.0048	0	80.58	VADNEGTETAGGFDGER
922.462	2	1842.9	0.0094	0	71.14	NLFDLLGDDESPAPAAAK
39	2::AFR98009.2	mannose-1-phosphate guanyltransferase [Cryptococcus neoformans var. grubii H99]	135	40211	5	15.9
39	2::XP_012052460.1	mannose-1-phosphate guanyltransferase [Cryptococcus neoformans var. grubii H99]	135	40211	5	15.9
Peptide exp mz	Peptide exp z	Peptide calc mr	Peptide delta	Peptide Misscleav	Peptide Score	Peptide Sequence	Peptide var Modi
538.786	2	1075.55	0.0061	0	73.87	SISSSITEPR
552.335	2	1102.65	0.0046	0	52.98	ALILVGGFGTR
583.789	2	1165.56	0.0051	0	58.56	CVIMSNATVR	Oxidation (M)
474.261	3	1419.75	0.0109	1	56.87	FVEKPVEFVGNR
846.465	2	1690.9	0.0104	0	44.76	INAGIYIFNPSVLDR
39	2::AFR96057.2	hypothetical protein CNAG_05739 [Cryptococcus neoformans var. grubii H99]	132	37455	4	13.6
39	2::XP_012050353.1	hypothetical protein CNAG_05739 [Cryptococcus neoformans var. grubii H99]	132	37455	4	13.6
Peptide exp mz	Peptide exp z	Peptide calc mr	Peptide delta	Peptide Misscleav	Peptide Score	Peptide Sequence	Peptide var Modi
473.754	2	945.492	0.0017	0	62.73	VVGFNPEGK
574.757	2	1147.49	0.0095	0	82.71	FNDGGVDPDGR
470.905	3	1409.69	0.0037	0	44.89	SELHTLDPATGNR
741.356	2	1480.69	0.0051	0	58.35	EYDAVLDETLDAK
39	2::AFR92257.1	glycerol-3-phosphate dehydrogenase (NAD()) [Cryptococcus neoformans var. grubii H99]	129	38007	3	10.2
39	2::XP_012046543.1	glycerol-3-phosphate dehydrogenase (NAD()) [Cryptococcus neoformans var. grubii H99]	129	38007	3	10.2
Peptide exp mz	Peptide exp z	Peptide calc mr	Peptide delta	Peptide Misscleav	Peptide Score	Peptide Sequence	Peptide var Modi
558.308	2	1114.6	0.0041	0	71.1	VLDTLEGNVR
680.362	2	1358.71	0.0006	0	70.92	FEDNVVAIPDLK
759.404	2	1516.79	0.0007	0	64.82	VYQIAWEGVPVEK
39	2::AFR94072.1	6-phosphogluconate dehydrogenase, decarboxylating 1 [Cryptococcus neoformans var. grubii H99]	114	54192	4	9
39	2::XP_012048411.1	6-phosphogluconate dehydrogenase, decarboxylating 1 [Cryptococcus neoformans var. grubii H99]	114	54192	4	9
Peptide exp mz	Peptide exp z	Peptide calc mr	Peptide delta	Peptide Misscleav	Peptide Score	Peptide Sequence	Peptide var Modi
503.24	2	1004.46	0.0067	0	36.45	DTDGVPMVR	Oxidation (M)
401.204	3	1200.58	0.0112	0	27.87	VDHFLENEAK
671.853	2	1341.69	-0.0015	0	71.77	SVFLSDITAAYR
720.897	2	1439.77	0.0062	0	87.13	TETLPANLIQGQR
39	2::AFR92807.1	urease accessory protein UreG [Cryptococcus neoformans var. grubii H99]	115	33777	3	11.2
39	2::XP_012046883.1	urease accessory protein UreG [Cryptococcus neoformans var. grubii H99]	115	33777	3	11.2
Peptide exp mz	Peptide exp z	Peptide calc mr	Peptide delta	Peptide Misscleav	Peptide Score	Peptide Sequence	Peptide var Modi
525.269	2	1048.52	0.005	0	67.3	EDQEFLIR
647.308	2	1292.59	0.0098	0	74.42	EDISANMGALEK	Oxidation (M)
756.424	2	1510.84	-0.0019	0	60.41	GGPGITQSDLLIVNK
39	2::AFR92431.2	phosphopantothenoylcysteine decarboxylase [Cryptococcus neoformans var. grubii H99]	101	35266	3	11.1
39	2::XP_012046246.1	phosphopantothenoylcysteine decarboxylase [Cryptococcus neoformans var. grubii H99]	101	35266	3	11.1
Peptide exp mz	Peptide exp z	Peptide calc mr	Peptide delta	Peptide Misscleav	Peptide Score	Peptide Sequence	Peptide var Modi
491.804	2	981.586	0.0073	0	41.11	APDIVGALVK
755.842	2	1509.65	0.0176	0	76.25	SMTNELGGDGTAWR	Oxidation (M)
798.337	2	1594.66	0.0014	0	35.93	VWTDEDEWSDWK
39	2::AFR96921.1	succinate dehydrogenase [ubiquinone] flavoprotein subunit, mitochondrial [Cryptococcus neoformans var. grubii H99]	85	70454	3	6
39	2::XP_012051649.1	succinate dehydrogenase [ubiquinone] flavoprotein subunit, mitochondrial [Cryptococcus neoformans var. grubii H99]	85	70454	3	6
Peptide exp mz	Peptide exp z	Peptide calc mr	Peptide delta	Peptide Misscleav	Peptide Score	Peptide Sequence	Peptide var Modi
578.282	2	1154.54	0.0098	0	43.56	TMQTDAAVFR	Oxidation (M)
683.821	2	1365.62	0.0122	0	53.82	GEGGYLVNSEGER
561.289	3	1680.82	0.0235	1	46.08	YTGEVLTVDEQGKDK
39	2::AFR97782.1	glutamate dehydrogenase (NADP) [Cryptococcus neoformans var. grubii H99]	74	49505	3	6
39	2::XP_012052614.1	glutamate dehydrogenase (NADP) [Cryptococcus neoformans var. grubii H99]	74	49505	3	6
Peptide exp mz	Peptide exp z	Peptide calc mr	Peptide delta	Peptide Misscleav	Peptide Score	Peptide Sequence	Peptide var Modi
503.731	2	1005.44	0.007	0	43.38	DLDNTDWK
564.807	2	1127.6	-0.0024	0	57.22	FLGFEQIFK
570.325	2	1138.63	0.0006	0	53.79	ALDVVQIPER
39	2::AFR95182.1	transketolase [Cryptococcus neoformans var. grubii H99]	58	74685	3	4.7
39	2::XP_012049657.1	transketolase [Cryptococcus neoformans var. grubii H99]	58	74685	3	4.7
Peptide exp mz	Peptide exp z	Peptide calc mr	Peptide delta	Peptide Misscleav	Peptide Score	Peptide Sequence	Peptide var Modi
444.264	2	886.512	0.0002	0	50.94	TLAADVVAK
596.803	2	1191.59	0	0	48.65	AEAEWQALFK
734.857	2	1467.7	-0.0044	0	30.36	FGFNPEESFAVPK
39	2::AFR95155.1	homocitrate synthase, mitochondrial [Cryptococcus neoformans var. grubii H99]	57	53963	3	6.3
39	2::XP_012049240.1	homocitrate synthase, mitochondrial [Cryptococcus neoformans var. grubii H99]	57	53963	3	6.3
Peptide exp mz	Peptide exp z	Peptide calc mr	Peptide delta	Peptide Misscleav	Peptide Score	Peptide Sequence	Peptide var Modi
487.717	2	973.414	0.0059	0	39.82	FSSEDSFR
574.831	2	1147.65	-0.0016	0	36.39	TAIEVIEFVK
645.808	2	1289.6	-0.0018	0	35.5	VGVADTVGCADAR

## Sheet: ID26502
Gel	Protein Accession	Protein Description	Protein Score	Protein Mass	Matched Peptides	Protein Coverage
37	2::AFR93876.1	GTP-binding protein ypt2 [Cryptococcus neoformans var. grubii H99]	435	23743	7	51.2
37	2::XP_012048152.1	GTP-binding protein ypt2 [Cryptococcus neoformans var. grubii H99]	435	23743	7	51.2
Peptide exp mz	Peptide exp z	Peptide calc mr	Peptide delta	Peptide Misscleav	Peptide Score	Peptide Sequence	Peptide var Modi
460.749	2	919.476	0.0073	0	62.18	LADEFGLR
479.784	2	957.549	0.0047	0	53.27	LLIGDSGVGK
496.27	2	990.513	0.0114	0	77.97	ALADEFGLR
536.328	2	1070.63	0.0072	0	52.2	LLLIGDSGVGK
602.295	2	1202.57	0.0071	0	70.6	QIWDTAGQER
658.841	2	1315.65	0.0144	0	78.58	LQIWDTAGQER
737.877	2	1473.73	0.0141	0	104.32	MSGPAGQHYDFLIK	Met-loss+Acetyl (Protein N-term M) [-89.03]
498.6	3	1492.76	0.0138	0	47.16	LSNIEQHASPGVNK
777.388	2	1552.75	0.0083	0	122.28	ANEGVEEAFFTLAR
518.595	3	1552.75	0.0106	0	33.27	ANEGVEEAFFTLAR
820.419	2	1638.82	0.0061	0	116.09	GAMGILLVYDVTDEK	Oxidation (M)
594.308	3	1779.89	0.013	0	46.41	TWLSNIEQHASPGVNK
954.5	2	1906.97	0.0098	0	120.14	LIDSQPQEAAPVQLGADR
636.67	3	1906.97	0.0149	0	80.51	LIDSQPQEAAPVQLGADR
37	2::AFR94332.1	GTP-binding protein ypt1 [Cryptococcus neoformans var. grubii H99]	191	22771	5	34.6
37	2::XP_012048696.1	GTP-binding protein ypt1 [Cryptococcus neoformans var. grubii H99]	191	22771	5	34.6
Peptide exp mz	Peptide exp z	Peptide calc mr	Peptide delta	Peptide Misscleav	Peptide Score	Peptide Sequence	Peptide var Modi
479.784	2	957.549	0.0047	0	53.27	LLIGDSGVGK
536.328	2	1070.63	0.0072	0	52.2	LLLIGDSGVGK
544.283	2	1086.55	0.0054	0	59.76	QWLQEIDR
602.295	2	1202.57	0.0071	0	70.6	QIWDTAGQER
637.804	2	1273.59	0.0061	0	46.68	MSAPEYDYLFK	Met-loss+Acetyl (Protein N-term M) [-89.03]
658.841	2	1315.65	0.0144	0	78.58	LQIWDTAGQER
692.845	2	1383.67	0.0044	0	75.1	TNVEQAFLTMSK	Oxidation (M)
728.365	2	1454.71	0.0077	0	52.38	ATNVEQAFLTMSK	Oxidation (M)
785.384	2	1568.75	0.0035	0	107.52	NATNVEQAFLTMSK	Oxidation (M)
854.95	2	1707.87	0.014	0	49.21	AFADELGIPFLETSAK
37	2::AFR95492.1	uracil phosphoribosyltransferase [Cryptococcus neoformans var. grubii H99]	364	25703	8	49.6
37	2::XP_012050086.1	uracil phosphoribosyltransferase [Cryptococcus neoformans var. grubii H99]	364	25703	8	49.6
Peptide exp mz	Peptide exp z	Peptide calc mr	Peptide delta	Peptide Misscleav	Peptide Score	Peptide Sequence	Peptide var Modi
407.709	2	813.398	0.0053	0	45.67	PDDIAQR
464.257	2	926.482	0.0165	0	63.06	LPDDIAQR
502.747	2	1003.48	0.0034	0	73.32	AGEAMEAGLR
505.759	2	1009.5	0.0044	0	48.08	FEGVAFQGR
522.249	2	1042.47	0.0118	0	42.32	GDFVFTSDR
561.277	2	1120.53	0.0086	0	58.51	EFEGVAFQGR	Glu->pyro-Glu (N-term E) [-18.01]
570.284	2	1138.54	0.0136	0	53.36	EFEGVAFQGR
633.304	2	1264.58	0.014	0	67.7	DPMLATGGSCIK	Oxidation (M)
634.867	2	1267.71	0.0069	0	57.47	LNLIASPEGINK
689.842	2	1377.66	0.0065	0	64.98	LDPMLATGGSCIK	Oxidation (M)
698.363	2	1394.7	0.0069	0	63.76	EVLLDHGVQEEK
708.403	2	1414.78	0.0085	0	63.7	FLNLIASPEGINK
746.385	2	1490.75	0.0088	0	59.61	LLDPMLATGGSCIK	Oxidation (M)
764.942	2	1527.87	0.0026	0	77.37	LFLNLIASPEGINK
790.425	2	1578.83	0.0094	0	90.47	AIEVLLDHGVQEEK
527.29	3	1578.83	0.0235	0	64.93	AIEVLLDHGVQEEK
821.487	2	1640.95	0.0085	0	111.21	ILFLNLIASPEGINK
557.669	3	1669.98	0.0094	0	29.45	LLVEEGLNHLPVLPK
859.466	2	1716.92	0.002	0	46.69	ILLLDPMLATGGSCIK	Oxidation (M)
871.438	2	1740.88	-0.0204	0	76.15	SNITTCLPASGSNIHK	Propyl (N-term) [+42.05]
627.671	3	1879.98	0.0124	0	31.72	YILLLDPMLATGGSCIK	Oxidation (M)
941.005	2	1879.98	0.0157	0	81.62	YILLLDPMLATGGSCIK	Oxidation (M)
948.998	2	1895.97	0.0069	0	59.74	YILLLDPMLATGGSCIK	Oxidation (M); Oxidation (K) [+15.99]
37	2::AFR93317.2	20S proteasome subunit beta 1 [Cryptococcus neoformans var. grubii H99]	285	25548	5	23.3
37	2::XP_012047234.1	20S proteasome subunit beta 1 [Cryptococcus neoformans var. grubii H99]	285	25548	5	23.3
Peptide exp mz	Peptide exp z	Peptide calc mr	Peptide delta	Peptide Misscleav	Peptide Score	Peptide Sequence	Peptide var Modi
391.714	2	781.408	0.0046	0	53.73	PGNELPR
448.261	2	894.492	0.0159	0	62.95	IPGNELPR
521.792	2	1041.56	0.0086	0	51.08	FIPGNELPR
590.325	2	1178.62	0.0152	0	66.36	HFIPGNELPR
460.233	3	1377.67	0.0024	1	56.9	MCVITQDKVER
465.565	3	1393.67	0.0028	1	79.24	MCVITQDKVER	Oxidation (M)
704.349	2	1406.67	0.0124	0	95.75	EVVGSMNAGSTAVVA	Oxidation (M)
736.893	2	1471.77	0.005	0	78.78	DQLSAGIIVAGWDK
752.891	2	1503.76	0.0099	0	46.91	DQLSAGIIVAGWDK	DiOx (CFMPWY) [+31.99]
1028	2	2053.98	0.0085	1	84.97	FWEGKEVVGSMNAGSTAVVA	Oxidation (M)
685.67	3	2053.98	0.0104	1	24.57	FWEGKEVVGSMNAGSTAVVA	Oxidation (M)
37	2::AFR96238.1	ATP synthase subunit beta, mitochondrial [Cryptococcus neoformans var. grubii H99]	238	58688	9	27.6
37	2::XP_012050629.1	ATP synthase subunit beta, mitochondrial [Cryptococcus neoformans var. grubii H99]	238	58688	9	27.6
Peptide exp mz	Peptide exp z	Peptide calc mr	Peptide delta	Peptide Misscleav	Peptide Score	Peptide Sequence	Peptide var Modi
475.797	2	949.571	0.0091	0	62.49	IPVGPAALGR
536.806	2	1071.59	0.005	0	61.94	TPAGLQTGSIK
558.826	2	1115.63	0.0041	0	58.51	VVDLLAPYAR
630.822	2	1259.64	-0.012	0	52.5	ETGVINLEGDSK	Glu->pyro-Glu+Methyl:2H(2)13C(1) (N-term E) [-0.98]
643.832	2	1285.64	0.005	0	81.62	MNVIGQPIDQR	Oxidation (M)
662.309	2	1322.6	0.0071	0	72.71	CIAMDGTDGLVR	Oxidation (M)
670.302	2	1338.62	-0.0339	0	64.4	CIAMDGTDGLVR	Oxidation (M); Methyl:2H(2) (N-term) [+16.03]
700.375	2	1398.73	0.0064	0	70.22	IMNVIGQPIDQR	Oxidation (M)
732.862	2	1463.71	-0.0044	0	31.42	ETVNAFEEILDGK
734.943	2	1467.87	0.0055	0	53.13	TVLIQELINNIAK
559.986	3	1676.92	0.0149	0	30.12	LVLEVAQHLGENTVR
894.475	2	1786.94	0.001	0	66.56	SIAELGIYPAVDPLDSK
932.466	3	2794.37	0.0105	0	52.31	EAPIHADAPEFVDQSTQAEVLETGIK
37	2::AFR96043.1	ketol-acid reductoisomerase, mitochondrial [Cryptococcus neoformans var. grubii H99]	132	44371	3	9.7
37	2::XP_012050476.1	ketol-acid reductoisomerase, mitochondrial [Cryptococcus neoformans var. grubii H99]	132	44371	3	9.7
Peptide exp mz	Peptide exp z	Peptide calc mr	Peptide delta	Peptide Misscleav	Peptide Score	Peptide Sequence	Peptide var Modi
615.789	2	1229.56	0.0064	0	52.54	EVYSDLYGER
780.375	2	1558.73	0.0101	0	45.79	ELDEIDNQEIWR
587.308	3	1758.89	0.0112	0	96.71	GINSSIAVYQDVTGHAK
37	2::AFR97763.1	chlorophyll synthesis pathway protein BchC [Cryptococcus neoformans var. grubii H99]	78	38489	3	8.9
37	2::XP_012052598.1	chlorophyll synthesis pathway protein BchC [Cryptococcus neoformans var. grubii H99]	78	38489	3	8.9
Peptide exp mz	Peptide exp z	Peptide calc mr	Peptide delta	Peptide Misscleav	Peptide Score	Peptide Sequence	Peptide var Modi
466.257	2	930.502	-0.002	0	44.76	AIDLLDSGK
493.236	2	984.455	0.0018	0	47.81	DGGFADYIK
512.923	3	1535.75	0.002	1	54.59	KVEAADEYIDLDR
37	2::AFR95498.1	small subunit ribosomal protein S9 [Cryptococcus neoformans var. grubii H99]	59	22281	3	16.1
37	2::XP_012050082.1	small subunit ribosomal protein S9 [Cryptococcus neoformans var. grubii H99]	59	22281	3	16.1
Peptide exp mz	Peptide exp z	Peptide calc mr	Peptide delta	Peptide Misscleav	Peptide Score	Peptide Sequence	Peptide var Modi
402.245	2	802.47	0.0061	0	45.42	VPSFVVR
439.742	2	877.466	0.0038	0	48.81	LAGEYGLR
455.223	2	908.424	0.0076	0	44.6	TEDFLER
516.798	2	1031.58	0.0042	0	39.41	LFEGNALIR
Gel	Protein Accession	Protein Description	Protein Score	Protein Mass	Matched Peptides	Protein Coverage
39	2::AFR92542.2	hypothetical protein CNAG_00409 [Cryptococcus neoformans var. grubii H99]	234	40637	4	17.9
39	2::XP_012046300.1	hypothetical protein CNAG_00409 [Cryptococcus neoformans var. grubii H99]	234	40637	4	17.9
Peptide exp mz	Peptide exp z	Peptide calc mr	Peptide delta	Peptide Misscleav	Peptide Score	Peptide Sequence	Peptide var Modi
554.279	2	1106.54	0.0082	0	47.94	EPGSGTGIFSR
660.356	2	1318.69	0.0102	0	75.61	IVEPGSGTGIFSR
720.395	2	1438.78	-0.0029	0	109.67	VQNGLGGVDGVIIAQ
810.36	2	1618.7	0.005	0	107.3	TGFGEGTNDFYNAAR
1014.5	2	2026.98	-0.0002	0	60.12	VGTVDGGFDSLGAVGEYGVTK
676.675	3	2026.98	0.018	0	49.39	VGTVDGGFDSLGAVGEYGVTK
719.368	3	2155.08	0.0033	1	67.1	KVGTVDGGFDSLGAVGEYGVTK
39	2::AFR92468.1	hsp75-like protein [Cryptococcus neoformans var. grubii H99]	200	67372	5	12.9
39	2::XP_012046659.1	hsp75-like protein [Cryptococcus neoformans var. grubii H99]	200	67372	5	12.9
Peptide exp mz	Peptide exp z	Peptide calc mr	Peptide delta	Peptide Misscleav	Peptide Score	Peptide Sequence	Peptide var Modi
614.822	2	1227.62	0.0077	0	54.43	VEIIANDQGNR
660.351	2	1318.68	0.0079	0	45.84	SPQEISAMVLTK	Oxidation (M)
729.354	2	1456.68	0.0106	0	81.89	TTPSYVAFTEGER
783.903	2	1565.78	0.0079	0	52.74	AVVTVPAYFNDSQR
814.386	2	1626.74	0.016	0	62.33	DGSPYVEVDYLNEK
840.411	2	1678.8	0.0083	0	86.6	NQSAMNPLNTIFDAK	Oxidation (M)
39	2::AFR97929.1	hsp71-like protein [Cryptococcus neoformans var. grubii H99]	114	69759	4	8.2
39	2::AFR97952.1	hsp72-like protein [Cryptococcus neoformans var. grubii H99]	114	69698	4	8.3
39	2::XP_012052712.1	hsp71-like protein [Cryptococcus neoformans var. grubii H99]	114	69759	4	8.2
39	2::XP_012052733.1	hsp72-like protein [Cryptococcus neoformans var. grubii H99]	114	69698	4	8.3
Peptide exp mz	Peptide exp z	Peptide calc mr	Peptide delta	Peptide Misscleav	Peptide Score	Peptide Sequence	Peptide var Modi
614.822	2	1227.62	0.0077	0	54.43	VEIIANDQGNR
743.847	2	1485.67	0.0065	0	56.94	TTPSYVAFNDSER
783.903	2	1565.78	0.0079	0	52.74	AVVTVPAYFNDSQR
864.413	2	1726.8	0.0135	0	43.14	NQVAMNPYNTVFDAK	Oxidation (M)
39	2::AFR98178.1	transaldolase [Cryptococcus neoformans var. grubii H99]	155	35443	3	12.7
39	2::XP_012052888.1	transaldolase [Cryptococcus neoformans var. grubii H99]	155	35443	3	12.7
Peptide exp mz	Peptide exp z	Peptide calc mr	Peptide delta	Peptide Misscleav	Peptide Score	Peptide Sequence	Peptide var Modi
618.847	2	1235.68	0.0043	0	56.35	IASTYEGILAAK
636.32	2	1270.62	0.0053	0	72.95	FSFDTQATINK
899.943	2	1797.86	0.0078	0	97.14	ATGTTVVADTGDFTSIDK
39	2::AFR97862.1	fumarate hydratase, mitochondrial [Cryptococcus neoformans var. grubii H99]	152	55201	5	17.8
39	2::XP_012052672.1	fumarate hydratase, mitochondrial [Cryptococcus neoformans var. grubii H99]	152	55201	5	17.8
Peptide exp mz	Peptide exp z	Peptide calc mr	Peptide delta	Peptide Misscleav	Peptide Score	Peptide Sequence	Peptide var Modi
539.285	2	1076.55	0.0055	0	56.52	QDAFENIIK
613.804	2	1225.6	-0.0045	0	52.3	TGYDFITAPNK
638.847	2	1275.68	-0.002	1	30.56	AKQDAFENIIK
640.291	2	1278.56	0.0096	0	76.85	VNPTQCEALTM	Oxidation (M)
670.352	2	1338.68	0.0076	0	80.69	ITGYDFITAPNK
760.862	2	1519.7	0.0084	0	61.55	VNPTQCEALTMVAA	Oxidation (M)
785.931	2	1569.84	0.0045	0	90.43	AVVEINEQLLPAMK	Oxidation (M)
825.424	2	1648.82	0.0139	0	46.22	SMLAQGGTAVGTGLNTR	Oxidation (M)
938.98	2	1875.95	-0.0016	0	61.52	NLSMLAQGGTAVGTGLNTR	Oxidation (M)
744.023	3	2229.03	0.0173	0	44.69	CGLGELELPENEPGSSIMPGK	Oxidation (M)
39	2::AFR94490.1	protein BMH2 [Cryptococcus neoformans var. grubii H99]	147	29090	3	20.3
39	2::XP_012048794.1	protein BMH2 [Cryptococcus neoformans var. grubii H99]	147	29090	3	20.3
Peptide exp mz	Peptide exp z	Peptide calc mr	Peptide delta	Peptide Misscleav	Peptide Score	Peptide Sequence	Peptide var Modi
557.78	2	1113.53	0.0118	0	64.79	YLAEFATGDK
662.335	2	1322.65	0.0085	1	47.11	MSNREDSVYLAK	Met-loss+Acetyl (Protein N-term M) [-89.03]
775.376	2	1548.73	0.0101	0	128.76	SVASSDQELTVEER
667.972	3	2000.88	0.0111	1	19.25	LAEQAERYEEMVENMK	2 Oxidation (M)
39	2::AFR94515.1	glucose-methanol-choline oxidoreductase [Cryptococcus neoformans var. grubii H99]	136	65625	5	10.9
39	2::XP_012048807.1	glucose-methanol-choline oxidoreductase [Cryptococcus neoformans var. grubii H99]	136	65625	5	10.9
Peptide exp mz	Peptide exp z	Peptide calc mr	Peptide delta	Peptide Misscleav	Peptide Score	Peptide Sequence	Peptide var Modi
539.239	2	1076.46	0.0066	0	40.21	EYDFYANR
657.362	2	1312.7	0.0117	0	65.26	TAVGVTVIGPDER
696.873	2	1391.73	0.0019	0	68.14	EVIVAQGVYESAK
520.269	3	1557.78	0.0059	0	48.33	GHELTVDVYNGVQK
612.963	3	1835.86	0.0082	0	37.82	STTYHDDLGLFPDDIK
39	2::AFR97558.1	pyruvate decarboxylase [Cryptococcus neoformans var. grubii H99]	128	68079	4	9.1
39	2::XP_012052124.1	pyruvate decarboxylase [Cryptococcus neoformans var. grubii H99]	128	68079	4	9.1
Peptide exp mz	Peptide exp z	Peptide calc mr	Peptide delta	Peptide Misscleav	Peptide Score	Peptide Sequence	Peptide var Modi
486.73	2	971.442	0.0031	0	47.3	FFETPMGK	Oxidation (M)
570.299	2	1138.59	-0.003	0	52.61	SVDSPVVPDPK
640.281	2	1278.55	0.0014	0	48.53	HPLYGGCYAGAN
641.804	2	1281.59	0.0052	0	24.34	TPTSWTEAFDK
807.382	2	1612.74	0.012	0	85.21	SDFNSGSFSVNIDPK
39	2::AFR96301.2	large subunit ribosomal protein L7/L12 [Cryptococcus neoformans var. grubii H99]	109	18920	4	46.9
39	2::XP_012050442.1	large subunit ribosomal protein L7/L12 [Cryptococcus neoformans var. grubii H99]	109	18920	4	46.9
Peptide exp mz	Peptide exp z	Peptide calc mr	Peptide delta	Peptide Misscleav	Peptide Score	Peptide Sequence	Peptide var Modi
553.797	2	1105.58	0.0024	0	52.37	PPTGEAPVNPK
574.326	2	1146.63	0.0083	0	58.96	FVESVPQTLK
581.785	2	1161.55	0.0042	0	45.9	MPNMNLVEAK	Oxidation (M)
581.789	2	1161.55	0.0108	0	83.74	MPNMNLVEAK	Oxidation (M)
608.846	2	1215.67	0.0066	0	53.9	TLQDLGATVSLV
681.846	2	1361.67	0.0102	0	84.63	ALMPNMNLVEAK	2 Oxidation (M)
697.36	2	1392.69	0.0161	0	106.7	SEAPPTGEAPVNPK
861.199	4	3440.75	0.0148	2	21.73	TKLNITEIALPSASAPASATASSSSSEAPAEEKPK
39	2::AFR97763.1	chlorophyll synthesis pathway protein BchC [Cryptococcus neoformans var. grubii H99]	75	38489	3	12
39	2::XP_012052598.1	chlorophyll synthesis pathway protein BchC [Cryptococcus neoformans var. grubii H99]	75	38489	3	12
Peptide exp mz	Peptide exp z	Peptide calc mr	Peptide delta	Peptide Misscleav	Peptide Score	Peptide Sequence	Peptide var Modi
707.371	2	1412.72	0.0081	0	56.86	GGTLLVYGVYEDK
509.941	3	1526.79	0.0146	0	42.66	MGGASHITIAANAGIK	Oxidation (M)
512.93	3	1535.75	0.0227	1	45.15	KVEAADEYIDLDR

## Sheet: ID26814
Gel	Protein Accession	Protein Description	Protein Score	Protein Mass	Matched Peptides	Protein Coverage
37	2::AFR92257.1	glycerol-3-phosphate dehydrogenase (NAD()) [Cryptococcus neoformans var. grubii H99]	1430	38007	19	59.9
37	2::XP_012046543.1	glycerol-3-phosphate dehydrogenase (NAD()) [Cryptococcus neoformans var. grubii H99]	1430	38007	19	59.9
Peptide exp mz	Peptide exp z	Peptide calc mr	Peptide delta	Peptide Misscleav	Peptide Score	Peptide Sequence	Peptide var Modi
402.243	2	802.462	0.0089	0	55.99	IGLIEMK
474.241	2	946.462	0.0059	0	53.63	GNWGSAISR
508.773	2	1015.53	0.0011	0	54.06	LDTLEGNVR
353.185	3	1056.54	-0.0009	0	34.44	DVHNFLNAK
529.281	2	1056.54	0.0126	0	53.98	DVHNFLNAK
546.271	2	1090.52	0.0129	0	85.06	GSGNWGSAISR
551.288	2	1100.56	0.0038	0	71.08	SGANIANEVAR
558.314	2	1114.6	0.0145	0	65.9	VLDTLEGNVR
585.812	2	1169.61	0.0011	0	92.5	DATALVFVTPH
616.329	2	1230.62	0.0182	1	69.44	NKEDGELWLK
620.805	2	1239.58	0.0117	0	54.32	EIINSEHENR
622.357	2	1242.69	0.0065	1	62.09	VLDTLEGNVRK
415.242	3	1242.69	0.0104	1	58.47	VLDTLEGNVRK
645.314	2	1288.59	0.0199	0	77.56	DTFSETTIGYR
671.327	2	1340.63	0.0066	0	70.47	TEIINSEHENR
453.912	3	1358.71	0.0049	0	58.16	FEDNVVAIPDLK
680.367	2	1358.71	0.0121	0	91.17	FEDNVVAIPDLK
686.867	2	1371.71	0.0086	0	133.98	SALSGANIANEVAR
727.869	2	1453.72	0.0079	0	62.2	LTEIINSEHENR
485.586	3	1453.72	0.0208	0	78.54	LTEIINSEHENR
728.92	2	1455.82	0.0011	0	56.97	ALVFVTPHQFLGK
730.392	2	1458.76	0.0114	0	127.35	VAVVGSGNWGSAISR
506.608	3	1516.79	0.0088	0	57.87	VYQIAWEGVPVEK
759.411	2	1516.79	0.0141	0	87.1	VYQIAWEGVPVEK
775.4	2	1548.78	0.0022	0	82.12	VYQIAWEGVPVEK	DiOx (CFMPWY) [+31.99]
528.284	3	1581.81	0.019	1	79.63	KLTEIINSEHENR
800.884	2	1599.75	0.0071	0	97.29	VSVWVYEEEFEGK
534.258	3	1599.75	0.0075	0	48.54	VSVWVYEEEFEGK
805.382	2	1608.75	0.0033	0	107.59	SFDQLEAEMLNGQK
537.258	3	1608.75	0.0058	0	70.16	SFDQLEAEMLNGQK
813.388	2	1624.74	0.0214	0	105.71	SFDQLEAEMLNGQK	Oxidation (M)
542.595	3	1624.74	0.0236	0	76.47	SFDQLEAEMLNGQK	Oxidation (M)
542.921	3	1625.72	0.0174	0	66.91	SFDQLEAEMLNGQK	Oxidation (M); Deamidated (NQ) [+0.98]
864.932	2	1727.84	0.009	1	44.03	VSVWVYEEEFEGKK
576.961	3	1727.84	0.0197	1	64.85	VSVWVYEEEFEGKK
871.949	2	1741.88	0.006	0	90.35	IPCSALSGANIANEVAR
581.989	3	1742.94	0.0095	0	43.16	DATALVFVTPHQFLGK
872.481	2	1742.94	0.0122	0	91.78	DATALVFVTPHQFLGK
596.328	3	1785.95	0.0119	1	38.75	FEDNVVAIPDLKEAVK
900.461	2	1798.9	0.0079	0	126.24	GIPCSALSGANIANEVAR
600.644	3	1798.9	0.0117	0	56.85	GIPCSALSGANIANEVAR
957.003	2	1911.98	0.0071	0	118.99	LGIPCSALSGANIANEVAR
638.338	3	1911.98	0.0096	0	81.19	LGIPCSALSGANIANEVAR
964.998	2	1927.98	0.0034	0	94.65	LGIPCSALSGANIANEVAR	Ox (CFHMPWY) [+15.99]
643.671	3	1927.98	0.0138	0	66.11	LGIPCSALSGANIANEVAR	Ox (CFHMPWY) [+15.99]
977.009	2	1952	0.0038	0	145.82	NIVAVAAGFIDGLGYGSNSK
651.678	3	1952	0.0124	0	77.75	NIVAVAAGFIDGLGYGSNSK
721.706	3	2162.08	0.0196	0	21.94	GIDVHGDDIHIFADLIEQR
37	2::AFR97763.1	chlorophyll synthesis pathway protein BchC [Cryptococcus neoformans var. grubii H99]	823	38489	16	56.2
37	2::XP_012052598.1	chlorophyll synthesis pathway protein BchC [Cryptococcus neoformans var. grubii H99]	823	38489	16	56.2
Peptide exp mz	Peptide exp z	Peptide calc mr	Peptide delta	Peptide Misscleav	Peptide Score	Peptide Sequence	Peptide var Modi
466.266	2	930.502	0.0159	0	56.01	AIDLLDSGK
493.245	2	984.455	0.0192	0	57.39	DGGFADYIK
377.884	3	1130.62	0.0118	0	58.83	PLVPGHEAVGR
426.908	3	1277.69	0.0148	0	67.56	FPLVPGHEAVGR
661.828	2	1321.63	0.008	0	61.27	EMNALLYSEPR
669.827	2	1337.63	0.0106	0	51.51	EMNALLYSEPR	Oxidation (M)
675.304	2	1348.59	0.0062	0	62.76	GSFSQTYCFPR
693.394	2	1384.77	-0.0016	0	52.02	GAGPTGLILAQLMK	Oxidation (M)
707.377	2	1412.72	0.0201	0	92.26	GGTLLVYGVYEDK
471.923	3	1412.72	0.0278	0	15.16	GGTLLVYGVYEDK
506.959	3	1517.87	-0.0152	0	51.9	VPVPEIGPEEVLLK
759.946	2	1517.87	0.0067	0	74.3	VPVPEIGPEEVLLK
509.94	3	1526.79	0.0105	0	66.78	MGGASHITIAANAGIK	Oxidation (M)
512.927	3	1535.75	0.0127	1	70.93	KVEAADEYIDLDR
768.888	2	1535.75	0.0151	1	83.43	KVEAADEYIDLDR
788.391	2	1574.76	0.0131	0	36.79	IIGSFSQTYCFPR
534.946	3	1601.81	0.0065	0	38.46	LPGWSPTDIFVNEK
801.917	2	1601.81	0.0106	0	74.63	LPGWSPTDIFVNEK
869.919	2	1737.81	0.0096	0	101.54	GTELFCENFAPAGVAR
586.979	3	1757.91	0.0064	1	34.68	LPGWSPTDIFVNEKR
608.703	3	1823.1	-0.008	0	45.07	VLLIGAGPTGLILAQLMK	Oxidation (M)
912.56	2	1823.1	0.0105	0	76.27	VLLIGAGPTGLILAQLMK	Oxidation (M)
622.982	3	1865.91	0.0161	1	80.19	KGTELFCENFAPAGVAR
628.315	3	1881.9	0.0186	1	64.72	KGTELFCENFAPAGVAR	Oxidation (E) [+15.99]
644.604	3	1930.78	0.0145	0	72.72	IAADVGETCGYCHYCR
725.352	3	2173.02	0.0081	0	68.4	TTGMVTDVFPLSDYQGALDK	Oxidation (M)
1087.52	2	2173.02	0.0085	0	86.44	TTGMVTDVFPLSDYQGALDK	Oxidation (M)
37	2::AFR98178.1	transaldolase [Cryptococcus neoformans var. grubii H99]	639	35443	12	53.6
37	2::XP_012052888.1	transaldolase [Cryptococcus neoformans var. grubii H99]	639	35443	12	53.6
Peptide exp mz	Peptide exp z	Peptide calc mr	Peptide delta	Peptide Misscleav	Peptide Score	Peptide Sequence	Peptide var Modi
573.339	2	1144.65	0.0136	0	54.52	LLEPAIQYAK
602.808	2	1203.6	0.0031	0	100.44	LDASSTGESIPK
618.852	2	1235.68	0.0131	0	89.79	IASTYEGILAAK
631.376	2	1260.73	0.0047	0	48.72	LLVEFGTEILK
636.322	2	1270.62	0.0092	0	77.5	FSFDTQATINK
666.854	2	1331.69	-0.0004	1	34.11	KLDASSTGESIPK
444.907	3	1331.69	0.0071	1	58.04	KLDASSTGESIPK
737.343	2	1472.66	0.0068	0	76.49	WALFDDVMAFDK	Oxidation (M)
543.296	3	1626.85	0.0207	1	76.7	LLDELNKSQDDLPK
560.593	3	1678.76	-0.0005	1	54.01	SKGGSVDVQSENAMDR
589.673	3	1765.99	0.0047	0	63.11	PQDATTNPSLILAAVK	Lys (N-term) [+128.09]
899.944	2	1797.86	0.0111	0	97.36	ATGTTVVADTGDFTSIDK
642.997	3	1925.96	0.0117	1	89.13	KATGTTVVADTGDFTSIDK
989.501	2	1976.99	-0.0007	0	54.33	NTGEIAALAGCDFLTISPK
1068	2	2133.98	0.011	0	82.08	ANPDTTYTAENDPGVQSVQK
712.339	3	2133.98	0.0145	0	86.85	ANPDTTYTAENDPGVQSVQK
37	2::AFR97558.1	pyruvate decarboxylase [Cryptococcus neoformans var. grubii H99]	407	68079	11	23
37	2::XP_012052124.1	pyruvate decarboxylase [Cryptococcus neoformans var. grubii H99]	407	68079	11	23
Peptide exp mz	Peptide exp z	Peptide calc mr	Peptide delta	Peptide Misscleav	Peptide Score	Peptide Sequence	Peptide var Modi
435.248	2	868.477	0.0057	0	61.96	GDAPAGLIR
454.239	2	906.463	0.0008	0	54.09	IEVFMPR	Oxidation (M)
486.732	2	971.442	0.008	0	53.21	FFETPMGK	Oxidation (M)
502.785	2	1003.55	0.003	0	40.83	LIEVFMPR
570.305	2	1138.59	0.0078	0	58.12	SVDSPVVPDPK
640.284	2	1278.55	0.0076	0	91.12	HPLYGGCYAGAN
745.867	2	1489.7	0.0142	1	38.74	LLDDEEFNKPDR
497.581	3	1489.7	0.0159	1	76.71	LLDDEEFNKPDR
522.601	3	1564.78	0.0024	1	38.59	GDEIKHEWLWPR
791.403	2	1580.78	0.0083	0	107.64	IFVLNNDGYEIER
807.382	2	1612.74	0.0118	0	100.82	SDFNSGSFSVNIDPK
828.434	2	1654.85	0.0087	0	80.4	EVESSDFVLYVGALK
464.001	4	1851.95	0.0259	0	27.7	TLHQSYAIHTPQELSK
678.34	3	2031.98	0.0143	0	80.88	HPLYGGCYAGANSLPTVQK
712.358	3	2134.05	0.005	0	70.92	GVHPYIFVLNNDGYEIER
37	2::AFR98009.2	mannose-1-phosphate guanyltransferase [Cryptococcus neoformans var. grubii H99]	357	40211	9	33.2
37	2::XP_012052460.1	mannose-1-phosphate guanyltransferase [Cryptococcus neoformans var. grubii H99]	357	40211	9	33.2
Peptide exp mz	Peptide exp z	Peptide calc mr	Peptide delta	Peptide Misscleav	Peptide Score	Peptide Sequence	Peptide var Modi
403.73	2	805.445	0.0004	0	57.01	LVGGFGTR
458.25	2	914.486	-0.0007	0	53.4	PLVEFCNK	Cys->Dha (C) [-33.99]
460.276	2	918.529	0.0096	0	52.33	ILVGGFGTR
503.76	2	1005.5	0.0099	0	45.16	PLVEFCNK
538.788	2	1075.55	0.0105	0	74.05	SISSSITEPR
552.334	2	1102.65	0.004	0	63.82	ALILVGGFGTR
583.292	2	1164.56	0.0067	0	59.57	CVIMSNATVR	Oxidation (M); Delta:H(4)C(3)O(1) (C) [+56.03]
583.79	2	1165.56	0.0075	0	86.42	CVIMSNATVR	Oxidation (M)
697.38	2	1392.74	0.005	0	79.84	GIYIFNPSVLDR
710.886	2	1419.75	0.0068	1	71.04	FVEKPVEFVGNR
474.262	3	1419.75	0.0135	1	50.06	FVEKPVEFVGNR
732.9	2	1463.78	0.009	0	68.06	AGIYIFNPSVLDR
846.461	2	1690.9	0.0023	0	64.87	INAGIYIFNPSVLDR
564.645	3	1690.9	0.0085	0	66.12	INAGIYIFNPSVLDR
606.617	3	1816.82	0.0057	0	27.19	DFHIAHGCEGSIMVTK	Oxidation (M)
667	3	1997.97	0.0083	0	87.57	DHSWIANSIVGWNSTVGR
701.714	3	2102.1	0.0192	1	78.71	AEPSAYGVVVTKPNSTVIDR
734.738	3	2201.17	0.0236	1	83.67	VAEPSAYGVVVTKPNSTVIDR
37	2::AFR95986.1	glyceraldehyde-3-phosphate dehydrogenase [Cryptococcus neoformans var. grubii H99]	295	36571	6	26.5
37	2::XP_012050787.1	glyceraldehyde-3-phosphate dehydrogenase [Cryptococcus neoformans var. grubii H99]	295	36571	6	26.5
Peptide exp mz	Peptide exp z	Peptide calc mr	Peptide delta	Peptide Misscleav	Peptide Score	Peptide Sequence	Peptide var Modi
410.722	2	819.424	0.0052	0	53.46	VGINGFGR	Deamidated (NQ) [+0.98]
565.316	2	1128.61	0.0041	0	47.92	ANIIPSSTGAAK
664.863	2	1327.71	0.0021	0	64.89	GAAANIIPSSTGAAK
669.353	2	1336.69	0.0045	1	32.82	GASYDEIKDVIK
712.862	2	1423.7	0.0069	0	55.06	CDLISYIAGVDAK
491.612	3	1471.8	0.0099	1	46.89	AIAVFGEKDPANIK
762.393	2	1522.77	0.0003	0	99.66	VCDLISYIAGVDAK
773.402	2	1544.79	0.0024	0	109	VPTSDVSVVDLVCR
515.938	3	1544.79	0.0039	0	57.65	VPTSDVSVVDLVCR
826.377	2	1650.73	0.0082	0	98.32	LVSWYDNEYGYSR
37	2::AFR97979.2	glyoxylate reductase [Cryptococcus neoformans var. grubii H99]	289	37996	6	23.5
37	2::XP_012052452.1	glyoxylate reductase [Cryptococcus neoformans var. grubii H99]	289	37996	6	23.5
Peptide exp mz	Peptide exp z	Peptide calc mr	Peptide delta	Peptide Misscleav	Peptide Score	Peptide Sequence	Peptide var Modi
471.789	2	941.555	0.0085	0	69.55	IGEGINLVK
615.331	2	1228.64	0.0064	0	57.73	ELIATANDNLR
698.307	2	1394.6	0.0051	0	85.55	DNQDEIDANFSK
833.466	2	1664.91	0.008	1	104.37	NAIAAANGEPLVAEVKV
580.948	3	1739.82	0.0038	0	49	CISTFSVGYDHIDVK
958.457	2	1914.9	0.0046	0	98.26	QSDYDLIVNPEDAPPSR
37	2::AFR96458.2	lactamase [Cryptococcus neoformans var. grubii H99]	234	36760	5	20.8
37	2::XP_012050882.1	lactamase [Cryptococcus neoformans var. grubii H99]	234	36760	5	20.8
Peptide exp mz	Peptide exp z	Peptide calc mr	Peptide delta	Peptide Misscleav	Peptide Score	Peptide Sequence	Peptide var Modi
458.58	3	1372.71	0.0071	0	31.46	DNANPPTHLPVAK
714.334	2	1426.65	0.0027	0	81.12	MSPLAVMVTMDGK	2 Oxidation (M); Ox_CMW (CMW) [+15.99]
492.934	3	1475.77	0.0063	0	72.85	LTNPSVDLHDLPR
806.423	2	1610.82	0.0086	0	63.03	IYISGDTLMVNELK	Oxidation (M)
851.965	2	1701.9	0.0111	0	124.72	LVQQEGLGGGVVYLDR
37	2::AFR92807.1	urease accessory protein UreG [Cryptococcus neoformans var. grubii H99]	220	33777	6	24.7
37	2::XP_012046883.1	urease accessory protein UreG [Cryptococcus neoformans var. grubii H99]	220	33777	6	24.7
Peptide exp mz	Peptide exp z	Peptide calc mr	Peptide delta	Peptide Misscleav	Peptide Score	Peptide Sequence	Peptide var Modi
514.79	2	1027.57	-0.0003	0	45.73	TVGIGGPVGSGK
525.269	2	1048.52	0.0037	0	67.58	EDQEFLIR
623.848	2	1245.67	0.0105	0	60.34	AFTVGIGGPVGSGK
647.306	2	1292.59	0.0064	0	69.84	EDISANMGALEK	Oxidation (M)
749.389	2	1496.76	0.0021	0	59.52	YNIAAVTNDIFTR
756.432	2	1510.84	0.0136	0	101.6	GGPGITQSDLLIVNK
537.285	3	1608.83	0.0033	0	44.49	IDLAPHVGASLDVMR	Oxidation (M)
37	2::AFR98890.2	2-dehydropantoate 2-reductase [Cryptococcus neoformans var. grubii H99]	211	36074	5	21.1
37	2::XP_012053614.1	2-dehydropantoate 2-reductase [Cryptococcus neoformans var. grubii H99]	211	36074	5	21.1
Peptide exp mz	Peptide exp z	Peptide calc mr	Peptide delta	Peptide Misscleav	Peptide Score	Peptide Sequence	Peptide var Modi
559.295	2	1116.57	0.0101	0	44.48	GLTVPDGTTEK
561.797	2	1121.57	0.0084	0	64.94	EGLTIGVDYR
752.86	2	1503.7	0.0106	0	91.93	TLPDNDGVEQFNR
589.007	3	1763.99	0.0105	1	58.72	AQRPTEVEVILGTPVR
697.652	3	2089.93	0.0082	0	80.05	STDEAAASGAEFSYVLCANK
37	2::AFR95288.2	inorganic pyrophosphatase [Cryptococcus neoformans var. grubii H99]	197	35443	5	20.9
37	2::XP_012049678.1	inorganic pyrophosphatase [Cryptococcus neoformans var. grubii H99]	197	35443	5	20.9
Peptide exp mz	Peptide exp z	Peptide calc mr	Peptide delta	Peptide Misscleav	Peptide Score	Peptide Sequence	Peptide var Modi
551.775	2	1101.53	0.0046	0	67.23	LNDIEDVER
635.871	2	1269.71	0.0153	0	59.74	TILNMVVEVPR
643.865	2	1285.71	0.01	0	82.42	TILNMVVEVPR	Oxidation (M)
703.904	2	1405.79	0.0005	0	67.32	VLVVDVNDPLAPR
600.98	3	1799.91	0.0077	0	56.55	VVSPFHDIPLFADESK
602.645	3	1804.9	0.0148	1	40.46	IPDGKPENVFAFSGEAK
37	2::AFR96761.2	alcohol dehydrogenase, propanol-preferring [Cryptococcus neoformans var. grubii H99]	179	44729	5	14.5
37	2::XP_012050990.1	alcohol dehydrogenase, propanol-preferring [Cryptococcus neoformans var. grubii H99]	179	44729	5	14.5
Peptide exp mz	Peptide exp z	Peptide calc mr	Peptide delta	Peptide Misscleav	Peptide Score	Peptide Sequence	Peptide var Modi
472.774	2	943.534	-0.0008	0	47.14	VIAIDSGAAK
516.783	2	1031.55	0.0008	0	52.53	TTGAELAIEK
532.769	2	1063.52	0.0055	0	55.07	GVFEDLEAGK
693.863	2	1385.7	0.0143	0	68.57	QASELGPGQCLVK
771.402	2	1540.78	0.0042	0	120.57	AATGGDGPAAAVVTAANK
37	2::AFR94072.1	6-phosphogluconate dehydrogenase, decarboxylating 1 [Cryptococcus neoformans var. grubii H99]	159	54192	3	8.6
37	2::XP_012048411.1	6-phosphogluconate dehydrogenase, decarboxylating 1 [Cryptococcus neoformans var. grubii H99]	159	54192	3	8.6
Peptide exp mz	Peptide exp z	Peptide calc mr	Peptide delta	Peptide Misscleav	Peptide Score	Peptide Sequence	Peptide var Modi
671.856	2	1341.69	0.0041	0	69.95	SVFLSDITAAYR
720.898	2	1439.77	0.0081	0	90.93	TETLPANLIQGQR
796.404	2	1590.8	-0.0064	0	76.64	GLLFVGSGVSGGEEGAR
37	2::AFR95155.1	homocitrate synthase, mitochondrial [Cryptococcus neoformans var. grubii H99]	156	53963	3	6.5
37	2::XP_012049240.1	homocitrate synthase, mitochondrial [Cryptococcus neoformans var. grubii H99]	156	53963	3	6.5
Peptide exp mz	Peptide exp z	Peptide calc mr	Peptide delta	Peptide Misscleav	Peptide Score	Peptide Sequence	Peptide var Modi
487.713	2	973.414	-0.0019	0	48.48	FSSEDSFR
645.81	2	1289.6	0.0027	0	109.55	VGVADTVGCADAR
654.372	2	1306.71	0.0169	0	63.38	SELVDLLSIYR
37	2::AFR95182.1	transketolase [Cryptococcus neoformans var. grubii H99]	150	74685	5	7.7
37	2::XP_012049657.1	transketolase [Cryptococcus neoformans var. grubii H99]	150	74685	5	7.7
Peptide exp mz	Peptide exp z	Peptide calc mr	Peptide delta	Peptide Misscleav	Peptide Score	Peptide Sequence	Peptide var Modi
444.266	2	886.512	0.0052	0	46.72	TLAADVVAK
492.794	2	983.565	0.0091	0	35.05	DAPTIINLK
596.804	2	1191.59	0.0003	0	75.86	AEAEWQALFK
667.852	2	1333.69	0.0027	0	82.77	LGNLVAIYDDNK
734.862	2	1467.7	0.0059	0	62.02	FGFNPEESFAVPK
37	2::AFR98523.2	RNA binding protein [Cryptococcus neoformans var. grubii H99]	141	32184	4	12.6
37	2::XP_012053276.1	RNA binding protein [Cryptococcus neoformans var. grubii H99]	141	32184	4	12.6
Peptide exp mz	Peptide exp z	Peptide calc mr	Peptide delta	Peptide Misscleav	Peptide Score	Peptide Sequence	Peptide var Modi
514.277	2	1026.54	-0.0002	0	54.6	ETLYNLFK
591.3	2	1180.58	0.0081	0	54.95	DVNEFPLYGK
919.445	2	1836.86	0.0104	0	64.49	GQAFVSFPDIESANEAR
613.3	3	1836.86	0.013	0	63.53	GQAFVSFPDIESANEAR
656	3	1964.96	0.0196	1	23.76	GQAFVSFPDIESANEARK
37	2::AFR95862.1	allergen [Cryptococcus neoformans var. grubii H99]	124	25943	3	18.8
37	2::XP_012050709.1	allergen [Cryptococcus neoformans var. grubii H99]	124	25943	3	18.8
Peptide exp mz	Peptide exp z	Peptide calc mr	Peptide delta	Peptide Misscleav	Peptide Score	Peptide Sequence	Peptide var Modi
625.851	2	1249.68	0.0089	0	45.97	HINTTEPVIAR
757.914	2	1513.8	0.0147	1	23.34	LQPVEDKQTLDTK
505.613	3	1513.8	0.0171	1	62.65	LQPVEDKQTLDTK
712.385	3	2134.12	0.0182	0	75.67	VEDAPIVHEVTTLPTISADK
37	2::AFR94515.1	glucose-methanol-choline oxidoreductase [Cryptococcus neoformans var. grubii H99]	123	65625	4	9.2
37	2::XP_012048807.1	glucose-methanol-choline oxidoreductase [Cryptococcus neoformans var. grubii H99]	123	65625	4	9.2
Peptide exp mz	Peptide exp z	Peptide calc mr	Peptide delta	Peptide Misscleav	Peptide Score	Peptide Sequence	Peptide var Modi
648.34	2	1294.66	0.0068	0	60.96	IQNVVYMVGEK	Oxidation (M)
696.876	2	1391.73	0.0083	0	57.17	EVIVAQGVYESAK
780.399	2	1558.78	0.0031	0	57.27	VADASVFPLIPDCR
612.966	3	1835.86	0.0179	0	44.84	STTYHDDLGLFPDDIK
37	2::AFR97929.1	hsp71-like protein [Cryptococcus neoformans var. grubii H99]	113	69759	3	6.7
37	2::AFR97952.1	hsp72-like protein [Cryptococcus neoformans var. grubii H99]	113	69698	3	6.7
37	2::XP_012052712.1	hsp71-like protein [Cryptococcus neoformans var. grubii H99]	113	69759	3	6.7
37	2::XP_012052733.1	hsp72-like protein [Cryptococcus neoformans var. grubii H99]	113	69698	3	6.7
Peptide exp mz	Peptide exp z	Peptide calc mr	Peptide delta	Peptide Misscleav	Peptide Score	Peptide Sequence	Peptide var Modi
743.849	2	1485.67	0.0104	0	61.4	TTPSYVAFNDSER
783.902	2	1565.78	0.0055	0	62.24	AVVTVPAYFNDSQR
559.252	3	1674.72	0.0098	0	43.17	ATAGDTHLGGEDFDNR
37	2::AFR92474.1	3~(2~),5~-bisphosphate nucleotidase [Cryptococcus neoformans var. grubii H99]	86	38891	3	8.4
37	2::XP_012047050.1	3~(2~),5~-bisphosphate nucleotidase [Cryptococcus neoformans var. grubii H99]	86	38891	3	8.4
Peptide exp mz	Peptide exp z	Peptide calc mr	Peptide delta	Peptide Misscleav	Peptide Score	Peptide Sequence	Peptide var Modi
509.285	2	1016.55	0.0058	0	58.18	NVQDTLVTK
535.295	2	1068.58	-0.0053	0	64.48	IGEEIIPNGK
614.87	2	1227.72	0.0059	0	36	ETQIGILSVLR
37	2::AFR96928.1	actin binding protein [Cryptococcus neoformans var. grubii H99]	81	44427	3	8.5
37	2::XP_012051655.1	actin binding protein [Cryptococcus neoformans var. grubii H99]	81	44427	3	8.5
Peptide exp mz	Peptide exp z	Peptide calc mr	Peptide delta	Peptide Misscleav	Peptide Score	Peptide Sequence	Peptide var Modi
469.734	2	937.451	0.003	0	56.81	TADFETVR
676.818	2	1351.62	0.0028	0	46.06	HLWDYTFNEK
622.62	3	1864.82	0.0168	1	34.49	EALCFTSYDLEMDKK	Oxidation (M)
37	2::AFR96921.1	succinate dehydrogenase [ubiquinone] flavoprotein subunit, mitochondrial [Cryptococcus neoformans var. grubii H99]	70	70454	3	6
37	2::XP_012051649.1	succinate dehydrogenase [ubiquinone] flavoprotein subunit, mitochondrial [Cryptococcus neoformans var. grubii H99]	70	70454	3	6
Peptide exp mz	Peptide exp z	Peptide calc mr	Peptide delta	Peptide Misscleav	Peptide Score	Peptide Sequence	Peptide var Modi
578.279	2	1154.54	0.004	0	61.98	TMQTDAAVFR	Oxidation (M)
683.815	2	1365.62	-0.0008	0	22.77	GEGGYLVNSEGER
561.284	3	1680.82	0.0084	1	38.35	YTGEVLTVDEQGKDK
Gel	Protein Accession	Protein Description	Protein Score	Protein Mass	Matched Peptides	Protein Coverage
39	2::AFR92257.1	glycerol-3-phosphate dehydrogenase (NAD()) [Cryptococcus neoformans var. grubii H99]	445	38007	10	36
39	2::XP_012046543.1	glycerol-3-phosphate dehydrogenase (NAD()) [Cryptococcus neoformans var. grubii H99]	445	38007	10	36
Peptide exp mz	Peptide exp z	Peptide calc mr	Peptide delta	Peptide Misscleav	Peptide Score	Peptide Sequence	Peptide var Modi
508.773	2	1015.53	0.0018	0	46.36	LDTLEGNVR
529.276	2	1056.54	0.0015	0	52.43	DVHNFLNAK
558.311	2	1114.6	0.009	0	65.5	VLDTLEGNVR
645.31	2	1288.59	0.0113	0	77.59	DTFSETTIGYR
680.366	2	1358.71	0.0099	0	88.39	FEDNVVAIPDLK
686.865	2	1371.71	0.0041	0	128.49	SALSGANIANEVAR
485.583	3	1453.72	0.01	0	55.89	LTEIINSEHENR
730.386	2	1458.76	-0.0002	0	113.95	VAVVGSGNWGSAISR
759.408	2	1516.79	0.0084	0	79.98	VYQIAWEGVPVEK
528.278	3	1581.81	0.0006	1	54.81	KLTEIINSEHENR
800.884	2	1599.75	0.0084	0	42.52	VSVWVYEEEFEGK
813.377	2	1624.74	-0.0015	0	100.76	SFDQLEAEMLNGQK	Oxidation (M)
813.877	2	1625.72	0.0154	0	48.9	SFDQLEAEMLNGQK	Oxidation (M); Deamidated (NQ) [+0.98]
39	2::AFR97558.1	pyruvate decarboxylase [Cryptococcus neoformans var. grubii H99]	439	68079	11	21.7
39	2::XP_012052124.1	pyruvate decarboxylase [Cryptococcus neoformans var. grubii H99]	439	68079	11	21.7
Peptide exp mz	Peptide exp z	Peptide calc mr	Peptide delta	Peptide Misscleav	Peptide Score	Peptide Sequence	Peptide var Modi
435.249	2	868.477	0.0066	0	62.29	GDAPAGLIR
454.24	2	906.463	0.0023	0	54	IEVFMPR	Oxidation (M)
486.731	2	971.442	0.0052	0	53.08	FFETPMGK	Oxidation (M)
510.785	2	1019.55	0.0074	0	46.78	LIEVFMPR	Oxidation (M)
570.307	2	1138.59	0.0127	0	58.44	SVDSPVVPDPK
640.283	2	1278.55	0.0061	0	78.43	HPLYGGCYAGAN
745.865	2	1489.7	0.0095	1	71.33	LLDDEEFNKPDR
497.583	3	1489.7	0.0215	1	76.85	LLDDEEFNKPDR
791.405	2	1580.78	0.0114	0	92.88	IFVLNNDGYEIER
537.615	3	1609.82	0.0046	1	33.38	VEDKSVDSPVVPDPK
807.38	2	1612.74	0.0078	0	111.58	SDFNSGSFSVNIDPK
828.435	2	1654.85	0.0097	0	112.14	EVESSDFVLYVGALK
464	4	1851.95	0.0214	0	31.65	TLHQSYAIHTPQELSK
678.337	3	2031.98	0.0062	0	92.01	HPLYGGCYAGANSLPTVQK
712.362	3	2134.05	0.0161	0	59.34	GVHPYIFVLNNDGYEIER
39	2::AFR92550.1	elongation factor 1-gamma [Cryptococcus neoformans var. grubii H99]	403	46734	18	42
39	2::XP_012046703.1	elongation factor 1-gamma [Cryptococcus neoformans var. grubii H99]	403	46734	18	42
Peptide exp mz	Peptide exp z	Peptide calc mr	Peptide delta	Peptide Misscleav	Peptide Score	Peptide Sequence	Peptide var Modi
356.234	2	710.444	0.0095	0	51.87	VPNLLR
411.232	2	820.444	0.0054	0	37.78	TFLVGER
442.251	2	882.481	0.0067	0	44.59	NLIPSDPK
456.248	2	910.476	0.0051	0	42.44	NPLDDLPK
486.792	2	971.565	0.0048	0	47.08	NVIDSILAK
524.793	2	1047.57	0.0003	0	60.74	AVFQTLVDR
543.335	2	1084.65	0.0058	0	54.46	LNVIDSILAK
555.814	2	1109.61	0.0047	1	42.71	AKNPLDDLPK
562.28	2	1122.53	0.0118	0	44.7	SAFNLEEWK
562.29	2	1122.56	0.0102	0	66.7	EYIAEIGSNK
570.321	2	1138.64	-0.0108	0	33.87	YLFGSVGVLGK
599.339	2	1196.66	0.0072	0	58.41	FVETIINHPK
399.895	3	1196.66	0.0089	0	55.85	FVETIINHPK
427.221	3	1278.64	0.0066	1	41.79	SAFNLEEWKR
640.332	2	1278.64	0.0127	1	53.32	SAFNLEEWKR
428.886	3	1283.63	0.0059	1	43.7	FDKEGFSIWR
670.348	2	1338.67	0.0106	0	43.97	EIFTPIEFSEK
671.832	2	1341.64	0.0138	0	77.96	GANGSLAWFYEK
672.322	2	1342.62	0.0102	0	66.61	GANGSLAWFYEK	Deamidated (NQ) [+0.98]
678.899	2	1355.78	0.007	0	100.32	ANDSVITGVLVLR
527.629	3	1579.85	0.0146	1	39.69	LKEIFTPIEFSEK
637.639	3	1909.88	0.0176	1	63.52	AKEEEEEEEPAVPAEPK
1119.52	2	2237.03	-0.0044	0	29.23	GQDAEPVVNVAPDWESYSFK
746.689	3	2237.03	0.0172	0	59.93	GQDAEPVVNVAPDWESYSFK
39	2::AFR97763.1	chlorophyll synthesis pathway protein BchC [Cryptococcus neoformans var. grubii H99]	304	38489	11	42.7
39	2::XP_012052598.1	chlorophyll synthesis pathway protein BchC [Cryptococcus neoformans var. grubii H99]	304	38489	11	42.7
Peptide exp mz	Peptide exp z	Peptide calc mr	Peptide delta	Peptide Misscleav	Peptide Score	Peptide Sequence	Peptide var Modi
466.263	2	930.502	0.0087	0	61.07	AIDLLDSGK
493.235	2	984.455	0.0004	0	48.01	DGGFADYIK
426.903	3	1277.69	0.0002	0	56.25	FPLVPGHEAVGR
669.824	2	1337.63	0.0042	0	51.93	EMNALLYSEPR	Oxidation (M)
707.371	2	1412.72	0.0097	0	68.43	GGTLLVYGVYEDK
509.938	3	1526.79	0.0038	0	48.94	MGGASHITIAANAGIK	Oxidation (M)
512.922	3	1535.75	-0.0014	1	55.96	KVEAADEYIDLDR
788.397	2	1574.76	0.0236	0	34.16	IIGSFSQTYCFPR
622.983	3	1865.91	0.0176	1	75.29	KGTELFCENFAPAGVAR
644.601	3	1930.78	0.004	0	60.99	IAADVGETCGYCHYCR
1087.52	2	2173.02	0.0019	0	33.26	TTGMVTDVFPLSDYQGALDK	Oxidation (M)
39	2::AFR94072.1	6-phosphogluconate dehydrogenase, decarboxylating 1 [Cryptococcus neoformans var. grubii H99]	303	54192	9	29.3
39	2::XP_012048411.1	6-phosphogluconate dehydrogenase, decarboxylating 1 [Cryptococcus neoformans var. grubii H99]	303	54192	9	29.3
Peptide exp mz	Peptide exp z	Peptide calc mr	Peptide delta	Peptide Misscleav	Peptide Score	Peptide Sequence	Peptide var Modi
503.242	2	1004.46	0.0093	0	35.79	DTDGVPMVR	Oxidation (M)
549.264	2	1096.51	0.005	0	58.46	DFFGAHTFR
671.85	2	1341.69	-0.0075	0	56.71	SVFLSDITAAYR
680.311	2	1358.6	0.0114	0	49.44	TATSGNVSSSTYNA
720.898	2	1439.77	0.0087	0	102.17	TETLPANLIQGQR
731.368	2	1460.72	0.0061	0	74.05	IISYAQGFMLMR	2 Oxidation (M)
796.411	2	1590.8	0.0066	0	120.4	GLLFVGSGVSGGEEGAR
628.647	3	1882.89	0.0303	0	41.36	VNDWHLNNAGIAAMWR	Oxidation (M)
632.299	3	1893.87	0.0087	0	22.01	NGPSLMPGGSDDAWPHIK	Oxidation (M)
870.048	3	2607.11	0.0093	0	53.09	TAAQAQGEPCCDWVGETGSGHYVK
39	2::AFR98009.2	mannose-1-phosphate guanyltransferase [Cryptococcus neoformans var. grubii H99]	299	40211	9	33.2
39	2::XP_012052460.1	mannose-1-phosphate guanyltransferase [Cryptococcus neoformans var. grubii H99]	299	40211	9	33.2
Peptide exp mz	Peptide exp z	Peptide calc mr	Peptide delta	Peptide Misscleav	Peptide Score	Peptide Sequence	Peptide var Modi
503.757	2	1005.5	0.0044	0	47.51	PLVEFCNK
538.787	2	1075.55	0.0076	0	73.98	SISSSITEPR
545.772	2	1089.57	-0.0365	0	48.1	SISSSITEPR	Methyl (T) [+14.02]
552.338	2	1102.65	0.0114	0	73.53	ALILVGGFGTR
583.786	2	1165.56	-0.0004	0	55.33	CVIMSNATVR	Oxidation (M)
425.237	3	1272.68	0.0067	1	49.58	VEKPVEFVGNR
697.38	2	1392.74	0.0044	0	74.53	GIYIFNPSVLDR
710.889	2	1419.75	0.0115	1	71	FVEKPVEFVGNR
474.265	3	1419.75	0.0234	1	61.04	FVEKPVEFVGNR
765.917	2	1529.81	0.0101	1	61.56	VAEPSAYGVVVTKPN
846.464	2	1690.9	0.0085	0	56.89	INAGIYIFNPSVLDR
606.617	3	1816.82	0.0067	0	23.9	DFHIAHGCEGSIMVTK	Oxidation (M)
667.003	3	1997.97	0.016	0	55.14	DHSWIANSIVGWNSTVGR
701.713	3	2102.1	0.017	1	74.13	AEPSAYGVVVTKPNSTVIDR
734.738	3	2201.17	0.0232	1	81.46	VAEPSAYGVVVTKPNSTVIDR
39	2::AFR96458.2	lactamase [Cryptococcus neoformans var. grubii H99]	233	36760	6	25.1
39	2::XP_012050882.1	lactamase [Cryptococcus neoformans var. grubii H99]	233	36760	6	25.1
Peptide exp mz	Peptide exp z	Peptide calc mr	Peptide delta	Peptide Misscleav	Peptide Score	Peptide Sequence	Peptide var Modi
576.328	2	1150.63	0.0073	0	42.61	DLPIVSTAHAK
458.579	3	1372.71	0.0055	0	33.64	DNANPPTHLPVAK
714.337	2	1426.65	0.0098	0	105.86	MSPLAVMVTMDGK	3 Oxidation (M)
492.935	3	1475.77	0.0088	0	61.86	LTNPSVDLHDLPR
769.936	2	1537.88	-0.0264	1	81.05	SITINPATTKPPTR	Propyl (N-term) [+42.05]
851.958	2	1701.9	-0.003	0	105.55	LVQQEGLGGGVVYLDR
673.032	3	2016.06	0.0088	1	34.57	LVQQEGLGGGVVYLDRGEK
39	2::AFR95986.1	glyceraldehyde-3-phosphate dehydrogenase [Cryptococcus neoformans var. grubii H99]	225	36571	6	19.8
39	2::XP_012050787.1	glyceraldehyde-3-phosphate dehydrogenase [Cryptococcus neoformans var. grubii H99]	225	36571	6	19.8
Peptide exp mz	Peptide exp z	Peptide calc mr	Peptide delta	Peptide Misscleav	Peptide Score	Peptide Sequence	Peptide var Modi
417.741	2	833.465	0.0021	0	48.42	AIAVFGEK
669.355	2	1336.69	0.008	1	51.26	GASYDEIKDVIK
491.611	3	1471.8	0.0083	1	47.84	AIAVFGEKDPANIK
762.396	2	1522.77	0.0069	0	55.17	VCDLISYIAGVDAK
773.405	2	1544.79	0.0083	0	115.78	VPTSDVSVVDLVCR
781.401	2	1560.78	0.0052	0	59.02	VPTSDVSVVDLVCR	Oxidation (R) [+15.99]
826.376	2	1650.73	0.007	0	89.5	LVSWYDNEYGYSR
39	2::AGV14286.1	elongation factor 2, variant [Cryptococcus neoformans var. grubii H99]	223	91946	6	8.4
39	2::AFR94637.2	elongation factor 2 [Cryptococcus neoformans var. grubii H99]	223	93334	6	8.2
39	2::XP_012048908.1	elongation factor 2 [Cryptococcus neoformans var. grubii H99]	223	93334	6	8.2
39	2::XP_012049590.1	elongation factor 2, variant [Cryptococcus neoformans var. grubii H99]	223	91946	6	8.4
Peptide exp mz	Peptide exp z	Peptide calc mr	Peptide delta	Peptide Misscleav	Peptide Score	Peptide Sequence	Peptide var Modi
485.279	2	968.54	0.0038	0	43.38	GGGQIIPTAR
500.302	2	998.587	0.0014	0	42.86	TNVLAVNIR
557.797	2	1113.57	0.0128	0	45.36	AEPLGEELTR
692.324	2	1382.63	0.0052	0	48.44	DSCVAAFQWATK
741.876	2	1481.73	0.0092	0	100.16	ETVTAESSMIALSK	Oxidation (M)
830.391	2	1658.76	0.0089	0	108.29	YLADTYGWDVTEAR
39	2::AFR94515.1	glucose-methanol-choline oxidoreductase [Cryptococcus neoformans var. grubii H99]	213	65625	7	17.2
39	2::XP_012048807.1	glucose-methanol-choline oxidoreductase [Cryptococcus neoformans var. grubii H99]	213	65625	7	17.2
Peptide exp mz	Peptide exp z	Peptide calc mr	Peptide delta	Peptide Misscleav	Peptide Score	Peptide Sequence	Peptide var Modi
419.55	3	1255.63	-0.0022	0	35.2	DGFGLDNHLLR
648.342	2	1294.66	0.0106	0	81.48	IQNVVYMVGEK	Oxidation (M)
696.875	2	1391.73	0.0047	0	75.86	EVIVAQGVYESAK
780.404	2	1558.78	0.0114	0	62.38	VADASVFPLIPDCR
447.737	4	1786.92	-0.0027	0	36.95	DIDHGVVSPELSVHGVK
596.649	3	1786.92	0.0023	0	46.16	DIDHGVVSPELSVHGVK
612.965	3	1835.86	0.0163	0	44.83	STTYHDDLGLFPDDIK
934.462	2	1866.9	0.0056	0	25.89	NFDFIVLGGGAGGCTVAGR
39	2::AFR97979.2	glyoxylate reductase [Cryptococcus neoformans var. grubii H99]	199	37996	5	19.1
39	2::XP_012052452.1	glyoxylate reductase [Cryptococcus neoformans var. grubii H99]	199	37996	5	19.1
Peptide exp mz	Peptide exp z	Peptide calc mr	Peptide delta	Peptide Misscleav	Peptide Score	Peptide Sequence	Peptide var Modi
471.786	2	941.555	0.0022	0	66.1	IGEGINLVK
615.334	2	1228.64	0.0119	0	46.45	ELIATANDNLR
698.311	2	1394.6	0.0119	0	88.63	DNQDEIDANFSK
833.462	2	1664.91	0.0007	1	71.56	NAIAAANGEPLVAEVKV
958.458	2	1914.9	0.0061	0	66.19	QSDYDLIVNPEDAPPSR
39	2::AFR96926.1	protein transporter SEC13 [Cryptococcus neoformans var. grubii H99]	158	36241	4	18.1
39	2::XP_012051653.1	protein transporter SEC13 [Cryptococcus neoformans var. grubii H99]	158	36241	4	18.1
Peptide exp mz	Peptide exp z	Peptide calc mr	Peptide delta	Peptide Misscleav	Peptide Score	Peptide Sequence	Peptide var Modi
523.285	2	1044.56	-0.0012	0	53.74	VTAGSDNLIR
596.823	2	1191.62	0.0075	0	99.56	FVTAGSDNLIR
645.793	2	1289.56	0.008	0	83.6	GSGGELQDGWER
822.356	2	1642.69	0.005	1	37.01	EGVGKGWECVSDFSS
783.385	3	2347.13	0.0051	0	33.66	DVAWAPNIGLPGMYIASASQDR	Oxidation (M)
39	2::AFR95182.1	transketolase [Cryptococcus neoformans var. grubii H99]	153	74685	4	8.6
39	2::XP_012049657.1	transketolase [Cryptococcus neoformans var. grubii H99]	153	74685	4	8.6
Peptide exp mz	Peptide exp z	Peptide calc mr	Peptide delta	Peptide Misscleav	Peptide Score	Peptide Sequence	Peptide var Modi
444.267	2	886.512	0.0074	0	46.19	TLAADVVAK
596.808	2	1191.59	0.0101	0	85.73	AEAEWQALFK
667.857	2	1333.69	0.0123	0	55.85	LGNLVAIYDDNK
734.863	2	1467.7	0.0073	0	89.53	FGFNPEESFAVPK
832.923	2	1663.85	-0.0206	0	108.89	ANFSSNDITAVNTIR	Trimethyl (Protein N-term A) [+42.05]
39	2::AFR92807.1	urease accessory protein UreG [Cryptococcus neoformans var. grubii H99]	148	33777	4	19.9
39	2::XP_012046883.1	urease accessory protein UreG [Cryptococcus neoformans var. grubii H99]	148	33777	4	19.9
Peptide exp mz	Peptide exp z	Peptide calc mr	Peptide delta	Peptide Misscleav	Peptide Score	Peptide Sequence	Peptide var Modi
514.791	2	1027.57	0.0016	0	58.68	TVGIGGPVGSGK
525.269	2	1048.52	0.0047	0	67.59	EDQEFLIR
647.308	2	1292.59	0.0104	0	50.8	EDISANMGALEK	Oxidation (M)
756.43	2	1510.84	0.0091	0	97.64	GGPGITQSDLLIVNK
537.287	3	1608.83	0.0107	0	35.17	IDLAPHVGASLDVMR	Oxidation (M)
39	2::AFR98890.2	2-dehydropantoate 2-reductase [Cryptococcus neoformans var. grubii H99]	127	36074	4	15.1
39	2::XP_012053614.1	2-dehydropantoate 2-reductase [Cryptococcus neoformans var. grubii H99]	127	36074	4	15.1
Peptide exp mz	Peptide exp z	Peptide calc mr	Peptide delta	Peptide Misscleav	Peptide Score	Peptide Sequence	Peptide var Modi
559.293	2	1116.57	0.0053	0	53.68	GLTVPDGTTEK
561.794	2	1121.57	0.0025	0	41.83	EGLTIGVDYR
752.86	2	1503.7	0.0093	0	87.39	TLPDNDGVEQFNR
589.006	3	1763.99	0.0079	1	47.03	AQRPTEVEVILGTPVR
39	2::AFR96761.2	alcohol dehydrogenase, propanol-preferring [Cryptococcus neoformans var. grubii H99]	119	44729	4	11.6
39	2::XP_012050990.1	alcohol dehydrogenase, propanol-preferring [Cryptococcus neoformans var. grubii H99]	119	44729	4	11.6
Peptide exp mz	Peptide exp z	Peptide calc mr	Peptide delta	Peptide Misscleav	Peptide Score	Peptide Sequence	Peptide var Modi
516.783	2	1031.55	0.0021	0	51.73	TTGAELAIEK
532.767	2	1063.52	0.0008	0	50.88	GVFEDLEAGK
604.813	2	1207.59	0.0236	0	38.29	SLGADAWVDFK
771.403	2	1540.78	0.0062	0	88.47	AATGGDGPAAAVVTAANK
39	2::AFR96921.1	succinate dehydrogenase [ubiquinone] flavoprotein subunit, mitochondrial [Cryptococcus neoformans var. grubii H99]	114	70454	3	4.9
39	2::XP_012051649.1	succinate dehydrogenase [ubiquinone] flavoprotein subunit, mitochondrial [Cryptococcus neoformans var. grubii H99]	114	70454	3	4.9
Peptide exp mz	Peptide exp z	Peptide calc mr	Peptide delta	Peptide Misscleav	Peptide Score	Peptide Sequence	Peptide var Modi
481.732	2	961.46	-0.0112	0	50.4	ESIEELDK
578.28	2	1154.54	0.0067	0	64.07	TMQTDAAVFR	Oxidation (M)
683.819	2	1365.62	0.008	0	69.43	GEGGYLVNSEGER
39	2::AFR97782.1	glutamate dehydrogenase (NADP) [Cryptococcus neoformans var. grubii H99]	98	49505	3	8.9
39	2::XP_012052614.1	glutamate dehydrogenase (NADP) [Cryptococcus neoformans var. grubii H99]	98	49505	3	8.9
Peptide exp mz	Peptide exp z	Peptide calc mr	Peptide delta	Peptide Misscleav	Peptide Score	Peptide Sequence	Peptide var Modi
570.324	2	1138.63	-0.0017	0	56.19	ALDVVQIPER
591.289	2	1180.56	0.0051	0	48.51	NALTGLMMGGGK	2 Oxidation (M)
580.285	3	1737.83	0.0049	0	59.46	HIGTDTDVPAGDIGTGGR
39	2::AFR95288.2	inorganic pyrophosphatase [Cryptococcus neoformans var. grubii H99]	94	35443	3	10.4
39	2::XP_012049678.1	inorganic pyrophosphatase [Cryptococcus neoformans var. grubii H99]	94	35443	3	10.4
Peptide exp mz	Peptide exp z	Peptide calc mr	Peptide delta	Peptide Misscleav	Peptide Score	Peptide Sequence	Peptide var Modi
551.777	2	1101.53	0.009	0	51.71	LNDIEDVER
643.858	2	1285.71	-0.0053	0	48.93	TILNMVVEVPR	Oxidation (M)
703.907	2	1405.79	0.006	0	63.12	VLVVDVNDPLAPR

## Sheet: ID26944
Gel	Protein Accession	Protein Description	Protein Score	Protein Mass	Matched Peptides	Protein Coverage
37	2::AFR97763.1	chlorophyll synthesis pathway protein BchC [Cryptococcus neoformans var. grubii H99]	875	38489	17	56.2
37	2::XP_012052598.1	chlorophyll synthesis pathway protein BchC [Cryptococcus neoformans var. grubii H99]	875	38489	17	56.2
Peptide exp mz	Peptide exp z	Peptide calc mr	Peptide delta	Peptide Misscleav	Peptide Score	Peptide Sequence	Peptide var Modi
466.266	2	930.502	0.0158	0	51.68	AIDLLDSGK
493.243	2	984.455	0.0154	0	57.62	DGGFADYIK
639.854	2	1277.69	0.0056	0	70.33	FPLVPGHEAVGR
426.909	3	1277.69	0.0166	0	57.45	FPLVPGHEAVGR
660.819	2	1319.62	0.0056	0	55.17	EMNALLYSEPR	Oxidation (M); Glu->pyro-Glu (N-term E) [-18.01]
661.83	2	1321.63	0.012	0	54.56	EMNALLYSEPR
669.824	2	1337.63	0.0051	0	53.31	EMNALLYSEPR	Oxidation (M)
675.308	2	1348.59	0.0143	0	62.64	GSFSQTYCFPR
704.84	2	1407.65	0.0146	0	82.59	VEAADEYIDLDR
707.373	2	1412.72	0.0135	0	92.16	GGTLLVYGVYEDK
759.946	2	1517.87	0.0066	0	105.96	VPVPEIGPEEVLLK
764.403	2	1526.79	0.0035	0	17.52	MGGASHITIAANAGIK	Oxidation (M)
509.939	3	1526.79	0.0084	0	66.4	MGGASHITIAANAGIK	Oxidation (M)
768.886	2	1535.75	0.0114	1	123.31	KVEAADEYIDLDR
512.928	3	1535.75	0.0149	1	58.25	KVEAADEYIDLDR
788.383	2	1574.76	-0.0039	0	67.83	IIGSFSQTYCFPR
801.917	2	1601.81	0.011	0	70.29	LPGWSPTDIFVNEK
869.919	2	1737.81	0.0087	0	99.56	GTELFCENFAPAGVAR
877.916	2	1753.81	0.0082	0	78.57	GTELFCENFAPAGVAR	Oxidation (E) [+15.99]
586.977	3	1757.91	0.0006	1	39.73	LPGWSPTDIFVNEKR
912.556	2	1823.1	0.0029	0	65.77	VLLIGAGPTGLILAQLMK	Oxidation (M)
622.983	3	1865.91	0.0187	1	85.51	KGTELFCENFAPAGVAR
628.313	3	1881.9	0.0117	1	59.88	KGTELFCENFAPAGVAR	Oxidation (E) [+15.99]
961.88	2	1921.81	-0.0676	0	56.72	IAADVGETCGYCHYCR	His->Lys (H) [-8.96]
644.605	3	1930.78	0.0162	0	62.1	IAADVGETCGYCHYCR
1087.53	2	2173.02	0.0149	0	78.68	TTGMVTDVFPLSDYQGALDK	Oxidation (M)
725.356	3	2173.02	0.0206	0	71.06	TTGMVTDVFPLSDYQGALDK	Oxidation (M)
37	2::AFR98178.1	transaldolase [Cryptococcus neoformans var. grubii H99]	373	35443	9	39
37	2::XP_012052888.1	transaldolase [Cryptococcus neoformans var. grubii H99]	373	35443	9	39
Peptide exp mz	Peptide exp z	Peptide calc mr	Peptide delta	Peptide Misscleav	Peptide Score	Peptide Sequence	Peptide var Modi
573.335	2	1144.65	0.0057	0	58.63	LLEPAIQYAK
602.809	2	1203.6	0.0057	0	72.48	LDASSTGESIPK
618.849	2	1235.68	0.0073	0	82.69	IASTYEGILAAK
636.323	2	1270.62	0.012	0	70.13	FSFDTQATINK
666.857	2	1331.69	0.0064	1	41.61	KLDASSTGESIPK
444.908	3	1331.69	0.008	1	51.62	KLDASSTGESIPK
450.571	3	1348.69	-0.0004	1	32.89	DGASLKEMLIEK	Oxidation (M)
543.293	3	1626.85	0.0118	1	58.09	LLDELNKSQDDLPK
589.674	3	1765.99	0.008	0	44.6	PQDATTNPSLILAAVK	Lys (N-term) [+128.09]
899.944	2	1797.86	0.0111	0	104.21	ATGTTVVADTGDFTSIDK
1068	2	2133.98	0.0076	0	86.65	ANPDTTYTAENDPGVQSVQK
712.338	3	2133.98	0.012	0	68.42	ANPDTTYTAENDPGVQSVQK
37	2::AFR96043.1	ketol-acid reductoisomerase, mitochondrial [Cryptococcus neoformans var. grubii H99]	295	44371	8	25.9
37	2::XP_012050476.1	ketol-acid reductoisomerase, mitochondrial [Cryptococcus neoformans var. grubii H99]	295	44371	8	25.9
Peptide exp mz	Peptide exp z	Peptide calc mr	Peptide delta	Peptide Misscleav	Peptide Score	Peptide Sequence	Peptide var Modi
426.732	2	851.439	0.01	0	46.39	TLDFAGTK
534.824	2	1067.62	0.0104	0	63.84	DVDVILVAPK
409.884	3	1226.63	0.0047	2	29.16	GLRPDANKDEL
615.792	2	1229.56	0.0121	0	52.4	EVYSDLYGER
780.375	2	1558.73	0.0097	0	64.78	ELDEIDNQEIWR
880.455	2	1758.89	0.0045	0	43.46	GINSSIAVYQDVTGHAK
587.308	3	1758.89	0.0125	0	53.07	GINSSIAVYQDVTGHAK
918.36	2	1834.7	0.0103	0	116.32	YGMDYMYNACSTTAR	Oxidation (M); Ox_CMW (CMW) [+15.99]
736.02	3	2205.02	0.016	0	62.76	NDTLAMIGYGSQGHGQSLNAR	Oxidation (M)
37	2::AFR96254.1	UMP-CMP kinase [Cryptococcus neoformans var. grubii H99]	276	30840	8	36.1
37	2::XP_012050636.1	UMP-CMP kinase [Cryptococcus neoformans var. grubii H99]	276	30840	8	36.1
Peptide exp mz	Peptide exp z	Peptide calc mr	Peptide delta	Peptide Misscleav	Peptide Score	Peptide Sequence	Peptide var Modi
395.241	2	788.464	0.0031	0	50.34	TVIDTIK
478.761	2	955.501	0.0057	0	45.31	LVTEYGFK
482.769	2	963.518	0.0053	0	36.34	FLIDGFPR
491.281	2	980.54	0.0069	0	43.9	HLSAGDLLR
523.306	2	1044.59	0.008	0	34.79	IVPMEVTIK	Oxidation (M)
746.358	2	1490.7	0.0058	0	88.38	YGAMITEYITEGK	Oxidation (M)
868.917	2	1735.81	0.0058	0	80.31	TFLETSMPVVDYYR	Oxidation (M)
806.139	4	3220.51	0.0161	0	31.53	HADADAEPAAAAAQTQTQTQTTPTPVSPETSK
1074.52	3	3220.51	0.0247	0	126.59	HADADAEPAAAAAQTQTQTQTTPTPVSPETSK
37	2::AFR97782.1	glutamate dehydrogenase (NADP) [Cryptococcus neoformans var. grubii H99]	246	49505	8	26.6
37	2::XP_012052614.1	glutamate dehydrogenase (NADP) [Cryptococcus neoformans var. grubii H99]	246	49505	8	26.6
Peptide exp mz	Peptide exp z	Peptide calc mr	Peptide delta	Peptide Misscleav	Peptide Score	Peptide Sequence	Peptide var Modi
570.325	2	1138.63	0.001	0	55.75	ALDVVQIPER
591.292	2	1180.56	0.0106	0	50.26	NALTGLMMGGGK	Oxidation (M); Ox_CMW (CMW) [+15.99]
735.844	2	1469.66	0.0116	0	126.27	NATDAGVCFYAPGK
787.944	2	1573.88	-0.0083	0	34.68	VLISGAGNVAQYAALK
544.606	3	1630.81	-0.0115	1	43.79	VTWERDDGTVAINR
580.287	3	1737.83	0.0117	0	44.64	HIGTDTDVPAGDIGTGGR
872.906	2	1743.78	0.0168	0	19.78	YVAEGSNMGCTLDAIK	Oxidation (M)
679.316	3	2034.92	0.0035	0	82.97	AANCGGVAVSGLEMAQNSQR	Oxidation (M)
37	2::AFR97952.1	hsp72-like protein [Cryptococcus neoformans var. grubii H99]	226	69698	6	13.1
37	2::XP_012052733.1	hsp72-like protein [Cryptococcus neoformans var. grubii H99]	226	69698	6	13.1
37	2::AFR97929.1	hsp71-like protein [Cryptococcus neoformans var. grubii H99]	226	69759	6	13.1
37	2::XP_012052712.1	hsp71-like protein [Cryptococcus neoformans var. grubii H99]	226	69759	6	13.1
Peptide exp mz	Peptide exp z	Peptide calc mr	Peptide delta	Peptide Misscleav	Peptide Score	Peptide Sequence	Peptide var Modi
584.786	2	1167.56	0.0023	0	44.71	NPYNTVFDAK
585.83	2	1169.64	0.0044	0	71.05	DAGAIAGLDVLR
709.391	2	1416.76	0.0101	0	95.83	SSVNEIVLVGGSTR
743.852	2	1485.67	0.0162	0	75.96	TTPSYVAFNDSER
783.902	2	1565.78	0.0057	0	50.25	AVVTVPAYFNDSQR
559.254	3	1674.72	0.0162	0	46.29	ATAGDTHLGGEDFDNR
864.413	2	1726.8	0.0123	0	70.48	NQVAMNPYNTVFDAK	Oxidation (M)
37	2::AFR94883.2	hypothetical protein CNAG_06946 [Cryptococcus neoformans var. grubii H99]	202	39281	6	21.8
37	2::XP_012049004.1	hypothetical protein CNAG_06946 [Cryptococcus neoformans var. grubii H99]	202	39281	6	21.8
Peptide exp mz	Peptide exp z	Peptide calc mr	Peptide delta	Peptide Misscleav	Peptide Score	Peptide Sequence	Peptide var Modi
719.367	2	1436.71	0.0053	1	63.85	LTDEYKDADLVR
479.916	3	1436.71	0.0129	1	75.23	LTDEYKDADLVR
749.904	2	1497.78	0.0106	0	42.08	TEVHPSGAIVVFDK
500.277	3	1497.78	0.0255	0	56.94	TEVHPSGAIVVFDK
824.399	2	1646.77	0.0117	0	71.57	IQCVPESPDSFVNR
832.394	2	1662.77	0.0055	0	60.32	IQCVPESPDSFVNR	Oxidation (V) [+15.99]
592.635	3	1774.87	0.0168	1	44.64	IQCVPESPDSFVNRK
1008.02	2	2014.01	0.0054	0	36.37	TSSPILYILYPESETSSK
1031.98	2	2061.93	0.0161	0	14.52	INPNWNEPTSDEIYDQK
37	2::AFR97558.1	pyruvate decarboxylase [Cryptococcus neoformans var. grubii H99]	188	68079	6	10.6
37	2::XP_012052124.1	pyruvate decarboxylase [Cryptococcus neoformans var. grubii H99]	188	68079	6	10.6
Peptide exp mz	Peptide exp z	Peptide calc mr	Peptide delta	Peptide Misscleav	Peptide Score	Peptide Sequence	Peptide var Modi
435.25	2	868.477	0.0085	0	61.78	GDAPAGLIR
469.744	2	937.469	0.0046	0	73	FGMALEVR	Oxidation (M)
570.306	2	1138.59	0.0096	0	45.71	SVDSPVVPDPK
641.807	2	1281.59	0.0109	0	45.69	TPTSWTEAFDK
497.577	3	1489.7	0.0052	1	57.68	LLDDEEFNKPDR
807.378	2	1612.74	0.0051	0	89.39	SDFNSGSFSVNIDPK
37	2::AFR98791.1	ribose-phosphate pyrophosphokinase [Cryptococcus neoformans var. grubii H99]	169	39037	5	14.3
37	2::XP_012053714.1	ribose-phosphate pyrophosphokinase [Cryptococcus neoformans var. grubii H99]	169	39037	5	14.3
Peptide exp mz	Peptide exp z	Peptide calc mr	Peptide delta	Peptide Misscleav	Peptide Score	Peptide Sequence	Peptide var Modi
510.274	2	1018.54	-0.0032	0	56.08	MELLVGDVK	Oxidation (M)
607.33	2	1212.63	0.0102	0	48.21	DAIIVSPDAGGAK
637.842	2	1273.66	0.0073	0	82.45	IVTNSIDQTQR
685.376	2	1368.74	0.0022	1	31.61	DAIIVSPDAGGAKR
457.253	3	1368.74	0.0023	1	59.91	DAIIVSPDAGGAKR
694.385	2	1386.75	0.0097	0	105.68	LIVTNSIDQTQR
595.649	3	1783.91	0.0099	0	39.53	VAILIDDMIDTGHTVR	Oxidation (M)
37	2::AFR98332.1	G protein beta subunit-like [Cryptococcus neoformans var. grubii H99]	145	37319	4	18
37	2::XP_012053137.1	G protein beta subunit-like [Cryptococcus neoformans var. grubii H99]	145	37319	4	18
Peptide exp mz	Peptide exp z	Peptide calc mr	Peptide delta	Peptide Misscleav	Peptide Score	Peptide Sequence	Peptide var Modi
644.85	2	1287.68	0.0039	0	76.25	LWDLSLGETVR
646.335	2	1290.65	0.0106	0	67.04	WIVTGSEDGTVK
702.834	2	1403.65	0	0	64.24	AAVCCALNDINLA
748.885	2	1495.76	0.0004	0	54.33	IWSTAGIDYTLEK
37	2::AFR94962.1	cytoplasmic protein [Cryptococcus neoformans var. grubii H99]	125	37997	3	11.2
37	2::XP_012049371.1	cytoplasmic protein [Cryptococcus neoformans var. grubii H99]	125	37997	3	11.2
Peptide exp mz	Peptide exp z	Peptide calc mr	Peptide delta	Peptide Misscleav	Peptide Score	Peptide Sequence	Peptide var Modi
622.35	2	1242.68	0.0034	0	78.2	VVEVQGSVDAIK
748.86	2	1495.7	0.0075	0	76.31	MFTIQGTPEATER	Oxidation (M)
825.893	2	1649.76	0.0062	1	39.73	RVNGSNSEVPASTDFA
37	2::AFR97441.1	homoserine dehydrogenase [Cryptococcus neoformans var. grubii H99]	114	39776	6	19.2
37	2::XP_012052199.1	homoserine dehydrogenase [Cryptococcus neoformans var. grubii H99]	114	39776	6	19.2
Peptide exp mz	Peptide exp z	Peptide calc mr	Peptide delta	Peptide Misscleav	Peptide Score	Peptide Sequence	Peptide var Modi
446.767	2	891.507	0.0119	0	35.38	YVGVIDVK
524.751	2	1047.48	0.0034	0	48.53	DDLSGTDVAR
536.773	2	1071.52	0.0075	0	49.53	GFSASEALYK
591.807	2	1181.59	0.0058	0	68.65	GSDNIISFTTK
597.388	2	1192.75	0.0066	0	65.1	IPVALLGLGGVGK
435.56	3	1303.66	0.0024	0	45.01	YPADHAFATALK
655.31	3	1962.89	0.0159	1	29.48	GYTEPDPRDDLSGTDVAR
Gel	Protein Accession	Protein Description	Protein Score	Protein Mass	Matched Peptides	Protein Coverage
39	2::AFR97929.1	hsp71-like protein [Cryptococcus neoformans var. grubii H99]	1557	69759	20	33.1
39	2::XP_012052712.1	hsp71-like protein [Cryptococcus neoformans var. grubii H99]	1557	69759	20	33.1
Peptide exp mz	Peptide exp z	Peptide calc mr	Peptide delta	Peptide Misscleav	Peptide Score	Peptide Sequence	Peptide var Modi
449.709	2	897.402	0.0029	0	67.8	VSDMFSGR
488.271	2	974.519	0.0079	0	81.1	PAIQVEYR
492.794	2	983.576	-0.0024	0	50.41	GAIAGLDVLR
506.254	2	1010.49	0.0087	0	60.89	LVSDMFSGR
514.253	2	1026.48	0.0104	0	68.22	LVSDMFSGR	Oxidation (M)
552.319	2	1102.61	0.0091	1	71.53	KPAIQVEYR
572.823	2	1143.62	0.0062	0	62.67	NEIVLVGGSTR
574.303	2	1146.58	0.0082	0	51.01	VNHFVQEFK
584.791	2	1167.56	0.0111	0	84.45	NPYNTVFDAK
585.837	2	1169.64	0.0188	0	103.47	DAGAIAGLDVLR
603.79	2	1205.56	0.0098	0	54.97	SINPDEAVAYGA
605.286	2	1208.55	0.0076	0	46.42	EELCQDLFR
614.822	2	1227.62	0.0095	0	86.42	VEIIANDQGNR
622.356	2	1242.69	0.0042	0	92.57	VNEIVLVGGSTR
630.845	2	1259.67	0.0089	0	59.4	LVNHFVQEFK
420.902	3	1259.67	0.0166	0	39.5	LVNHFVQEFK
641.79	2	1281.55	0.0099	0	90.36	FEDAEVQADMK
642.798	2	1283.58	0.004	0	60	PSYVAFNDSER
649.318	2	1296.61	0.0126	0	48.36	TVPAYFNDSQR
649.786	2	1297.55	0.0074	0	94.72	FEDAEVQADMK	Oxidation (M)
650.309	2	1298.6	0.0079	0	57.44	MNPYNTVFDAK
658.307	2	1314.59	0.0077	0	81.37	MNPYNTVFDAK	Oxidation (M)
662.807	2	1323.59	0.007	0	69.81	FEELCQDLFR	Cyano (C) [+25.00]
663.338	2	1324.65	0.0114	0	72	ETAEAYLGGTVSK
665.875	2	1329.73	0.01	0	89.73	SVNEIVLVGGSTR
678.824	2	1355.62	0.0148	0	81.59	FEELCQDLFR
681.865	2	1361.71	0.0048	0	53.9	TPEEISSMVLIK	Oxidation (M)
685.826	2	1369.63	0.0046	0	57.76	FEELCQDLFR	Propionamide (C) [+71.04]
686.819	2	1371.61	0.0102	0	51	FEELCQDLFR	Oxidation (Q) [+15.99]
693.327	2	1384.63	0.0129	0	74.93	TPSYVAFNDSER
693.826	2	1385.63	0.0083	0	79.74	AMNPYNTVFDAK	Oxidation (M)
698.851	2	1395.68	0.0091	0	64.88	VTVPAYFNDSQR
470.894	3	1409.65	0.0092	1	44.65	KFEDAEVQADMK
705.838	2	1409.65	0.0119	1	78.76	KFEDAEVQADMK
709.387	2	1416.76	0.0029	0	109.55	SSVNEIVLVGGSTR
485.259	3	1452.75	0.0076	1	59.58	KETAEAYLGGTVSK
727.385	2	1452.75	0.0103	1	113.11	KETAEAYLGGTVSK
743.361	2	1484.7	0.0101	0	72.98	VAMNPYNTVFDAK	Oxidation (M)
743.855	2	1485.67	0.0209	0	71.87	TTPSYVAFNDSER
748.386	2	1494.75	0.011	0	64.37	VVTVPAYFNDSQR
751.847	2	1501.67	0.0113	0	77.23	TTPSYVAFNDSER	Ox (CFHMPWY) [+15.99]
752.869	2	1503.72	0.0038	0	81.93	SINPDEAVAYGAAVQ
755.401	2	1508.78	0.0071	0	58.66	FTPEEISSMVLIK	Oxidation (M)
773.915	2	1545.8	0.011	0	75.55	INEPTAAAIAYGLDK
521.283	3	1560.81	0.0121	1	88.38	NEPTAAAIAYGLDKK
781.421	2	1560.81	0.0134	1	65.64	NEPTAAAIAYGLDKK
522.939	3	1565.78	0.0129	0	51.64	AVVTVPAYFNDSQR
783.909	2	1565.78	0.0201	0	69.06	AVVTVPAYFNDSQR
528.595	3	1582.76	0.0057	1	59.58	ARFEELCQDLFR
528.941	3	1583.79	0.0157	1	46.73	MKETAEAYLGGTVSK
800.901	2	1599.78	0.0059	1	49.9	MKETAEAYLGGTVSK	Oxidation (M)
534.272	3	1599.78	0.0115	1	64.64	MKETAEAYLGGTVSK	Oxidation (M)
807.391	2	1612.76	0.0118	0	111.54	QVAMNPYNTVFDAK	Oxidation (M)
541.63	3	1621.86	0.0041	0	39.4	IFTPEEISSMVLIK	Oxidation (M)
811.944	2	1621.86	0.0104	0	85.67	IFTPEEISSMVLIK	Oxidation (M)
823.912	2	1645.79	0.0145	0	90.68	SINPDEAVAYGAAVQAA
830.45	2	1658.89	-0.002	0	139.28	IINEPTAAAIAYGLDK
553.973	3	1658.89	0.0107	0	90.98	IINEPTAAAIAYGLDK
558.979	3	1673.9	0.0174	1	98.84	INEPTAAAIAYGLDKK
838.375	2	1674.72	0.0128	0	77.48	ATAGDTHLGGEDFDNR
559.258	3	1674.72	0.0272	0	48.21	ATAGDTHLGGEDFDNR
856.415	2	1710.8	0.0116	0	113.48	NQVAMNPYNTVFDAK
864.415	2	1726.8	0.0172	0	143.48	NQVAMNPYNTVFDAK	Oxidation (M)
864.904	2	1727.78	0.0109	0	110.19	NQVAMNPYNTVFDAK	Oxidation (M); Deamidated (NQ) [+0.98]
592	3	1772.96	0.0133	1	61.06	IDKSSVNEIVLVGGSTR
894.5	2	1786.98	0.0028	1	53.14	IINEPTAAAIAYGLDKK
596.677	3	1786.98	0.0274	1	93.23	IINEPTAAAIAYGLDKK
39	2::AFR97952.1	hsp72-like protein [Cryptococcus neoformans var. grubii H99]	1293	69698	16	27.7
39	2::XP_012052733.1	hsp72-like protein [Cryptococcus neoformans var. grubii H99]	1293	69698	16	27.7
Peptide exp mz	Peptide exp z	Peptide calc mr	Peptide delta	Peptide Misscleav	Peptide Score	Peptide Sequence	Peptide var Modi
449.709	2	897.402	0.0029	0	67.8	VSDMFSGR
492.794	2	983.576	-0.0024	0	50.41	GAIAGLDVLR
506.254	2	1010.49	0.0087	0	60.89	LVSDMFSGR
514.253	2	1026.48	0.0104	0	68.22	LVSDMFSGR	Oxidation (M)
572.823	2	1143.62	0.0062	0	62.67	NEIVLVGGSTR
574.303	2	1146.58	0.0082	0	51.01	VNHFVQEFK
584.791	2	1167.56	0.0111	0	84.45	NPYNTVFDAK
585.837	2	1169.64	0.0188	0	103.47	DAGAIAGLDVLR
603.79	2	1205.56	0.0098	0	54.97	SINPDEAVAYGA
605.286	2	1208.55	0.0076	0	46.42	EELCQDLFR
614.822	2	1227.62	0.0095	0	86.42	VEIIANDQGNR
622.356	2	1242.69	0.0042	0	92.57	VNEIVLVGGSTR
630.845	2	1259.67	0.0089	0	59.4	LVNHFVQEFK
420.902	3	1259.67	0.0166	0	39.5	LVNHFVQEFK
642.798	2	1283.58	0.004	0	60	PSYVAFNDSER
649.318	2	1296.61	0.0126	0	48.36	TVPAYFNDSQR
650.309	2	1298.6	0.0079	0	57.44	MNPYNTVFDAK
658.307	2	1314.59	0.0077	0	81.37	MNPYNTVFDAK	Oxidation (M)
662.807	2	1323.59	0.007	0	69.81	FEELCQDLFR	Cyano (C) [+25.00]
663.338	2	1324.65	0.0114	0	72	ETAEAYLGGTVSK
665.875	2	1329.73	0.01	0	89.73	SVNEIVLVGGSTR
678.824	2	1355.62	0.0148	0	81.59	FEELCQDLFR
685.826	2	1369.63	0.0046	0	57.76	FEELCQDLFR	Propionamide (C) [+71.04]
686.819	2	1371.61	0.0102	0	51	FEELCQDLFR	Oxidation (Q) [+15.99]
693.327	2	1384.63	0.0129	0	74.93	TPSYVAFNDSER
693.826	2	1385.63	0.0083	0	79.74	AMNPYNTVFDAK	Oxidation (M)
698.851	2	1395.68	0.0091	0	64.88	VTVPAYFNDSQR
709.387	2	1416.76	0.0029	0	109.55	SSVNEIVLVGGSTR
485.259	3	1452.75	0.0076	1	59.58	KETAEAYLGGTVSK
727.385	2	1452.75	0.0103	1	113.11	KETAEAYLGGTVSK
743.361	2	1484.7	0.0101	0	72.98	VAMNPYNTVFDAK	Oxidation (M)
743.855	2	1485.67	0.0209	0	71.87	TTPSYVAFNDSER
748.386	2	1494.75	0.011	0	64.37	VVTVPAYFNDSQR
751.847	2	1501.67	0.0113	0	77.23	TTPSYVAFNDSER	Ox (CFHMPWY) [+15.99]
752.869	2	1503.72	0.0038	0	81.93	SINPDEAVAYGAAVQ
773.915	2	1545.8	0.011	0	75.55	INEPTAAAIAYGLDK
521.283	3	1560.81	0.0121	1	88.38	NEPTAAAIAYGLDKK
781.421	2	1560.81	0.0134	1	65.64	NEPTAAAIAYGLDKK
522.939	3	1565.78	0.0129	0	51.64	AVVTVPAYFNDSQR
783.909	2	1565.78	0.0201	0	69.06	AVVTVPAYFNDSQR
528.595	3	1582.76	0.0057	1	59.58	ARFEELCQDLFR
528.941	3	1583.79	0.0157	1	46.73	MKETAEAYLGGTVSK
800.901	2	1599.78	0.0059	1	49.9	MKETAEAYLGGTVSK	Oxidation (M)
534.272	3	1599.78	0.0115	1	64.64	MKETAEAYLGGTVSK	Oxidation (M)
807.391	2	1612.76	0.0118	0	111.54	QVAMNPYNTVFDAK	Oxidation (M)
823.912	2	1645.79	0.0145	0	90.68	SINPDEAVAYGAAVQAA
830.45	2	1658.89	-0.002	0	139.28	IINEPTAAAIAYGLDK
553.973	3	1658.89	0.0107	0	90.98	IINEPTAAAIAYGLDK
558.979	3	1673.9	0.0174	1	98.84	INEPTAAAIAYGLDKK
838.375	2	1674.72	0.0128	0	77.48	ATAGDTHLGGEDFDNR
559.258	3	1674.72	0.0272	0	48.21	ATAGDTHLGGEDFDNR
856.415	2	1710.8	0.0116	0	113.48	NQVAMNPYNTVFDAK
864.415	2	1726.8	0.0172	0	143.48	NQVAMNPYNTVFDAK	Oxidation (M)
864.904	2	1727.78	0.0109	0	110.19	NQVAMNPYNTVFDAK	Oxidation (M); Deamidated (NQ) [+0.98]
592	3	1772.96	0.0133	1	61.06	IDKSSVNEIVLVGGSTR
894.5	2	1786.98	0.0028	1	53.14	IINEPTAAAIAYGLDKK
596.677	3	1786.98	0.0274	1	93.23	IINEPTAAAIAYGLDKK
39	2::AFR97763.1	chlorophyll synthesis pathway protein BchC [Cryptococcus neoformans var. grubii H99]	803	38489	15	55.9
39	2::XP_012052598.1	chlorophyll synthesis pathway protein BchC [Cryptococcus neoformans var. grubii H99]	803	38489	15	55.9
Peptide exp mz	Peptide exp z	Peptide calc mr	Peptide delta	Peptide Misscleav	Peptide Score	Peptide Sequence	Peptide var Modi
466.263	2	930.502	0.0094	0	50.74	AIDLLDSGK
493.23	2	984.455	-0.0099	0	75.18	DGGFADYIK
426.908	3	1277.69	0.0145	0	56.25	FPLVPGHEAVGR
661.829	2	1321.63	0.0095	0	59.23	EMNALLYSEPR
669.827	2	1337.63	0.0113	0	50.21	EMNALLYSEPR	Oxidation (M)
675.304	2	1348.59	0.0071	0	57.3	GSFSQTYCFPR
707.374	2	1412.72	0.0149	0	79.07	GGTLLVYGVYEDK
759.946	2	1517.87	0.0077	0	92.91	VPVPEIGPEEVLLK
506.969	3	1517.87	0.0137	0	44.42	VPVPEIGPEEVLLK
509.94	3	1526.79	0.0095	0	68.6	MGGASHITIAANAGIK	Oxidation (M)
768.883	2	1535.75	0.004	1	106.81	KVEAADEYIDLDR
512.929	3	1535.75	0.0172	1	65.36	KVEAADEYIDLDR
788.388	2	1574.76	0.0062	0	81	IIGSFSQTYCFPR
801.915	2	1601.81	0.0075	0	83.81	LPGWSPTDIFVNEK
534.949	3	1601.81	0.0174	0	31.54	LPGWSPTDIFVNEK
580.278	3	1737.81	-0.003	0	52.32	GTELFCENFAPAGVAR
869.917	2	1737.81	0.0046	0	101.64	GTELFCENFAPAGVAR
608.705	3	1823.1	-0.0019	0	27.19	VLLIGAGPTGLILAQLMK	Oxidation (M)
912.56	2	1823.1	0.0095	0	33.17	VLLIGAGPTGLILAQLMK	Oxidation (M)
622.985	3	1865.91	0.0236	1	75.67	KGTELFCENFAPAGVAR
644.603	3	1930.78	0.0121	0	57.84	IAADVGETCGYCHYCR
725.351	3	2173.02	0.0065	0	73.69	TTGMVTDVFPLSDYQGALDK	Oxidation (M)
1087.53	2	2173.02	0.0131	0	103.5	TTGMVTDVFPLSDYQGALDK	Oxidation (M)
39	2::AFR96043.1	ketol-acid reductoisomerase, mitochondrial [Cryptococcus neoformans var. grubii H99]	355	44371	9	28.9
39	2::XP_012050476.1	ketol-acid reductoisomerase, mitochondrial [Cryptococcus neoformans var. grubii H99]	355	44371	9	28.9
Peptide exp mz	Peptide exp z	Peptide calc mr	Peptide delta	Peptide Misscleav	Peptide Score	Peptide Sequence	Peptide var Modi
426.73	2	851.439	0.0067	0	50.47	TLDFAGTK
429.231	2	856.444	0.004	0	45.23	GALDWAPK
534.823	2	1067.62	0.0097	0	63.94	DVDVILVAPK
615.792	2	1229.56	0.0123	0	53.61	EVYSDLYGER
780.375	2	1558.73	0.0087	0	68.49	ELDEIDNQEIWR
861.443	2	1720.88	-0.0067	0	59.35	EANLPVFEALYNSVR
587.307	3	1758.89	0.0093	0	62.1	GINSSIAVYQDVTGHAK
880.461	2	1758.89	0.0181	0	31.77	GINSSIAVYQDVTGHAK
918.362	2	1834.7	0.0127	0	96.32	YGMDYMYNACSTTAR	Oxidation (M); Ox_CMW (CMW) [+15.99]
736.022	3	2205.02	0.0211	0	74.5	NDTLAMIGYGSQGHGQSLNAR	Oxidation (M)
39	2::AFR97558.1	pyruvate decarboxylase [Cryptococcus neoformans var. grubii H99]	339	68079	10	19.6
39	2::XP_012052124.1	pyruvate decarboxylase [Cryptococcus neoformans var. grubii H99]	339	68079	10	19.6
Peptide exp mz	Peptide exp z	Peptide calc mr	Peptide delta	Peptide Misscleav	Peptide Score	Peptide Sequence	Peptide var Modi
435.251	2	868.477	0.01	0	61.95	GDAPAGLIR
469.744	2	937.469	0.0047	0	73.19	FGMALEVR	Oxidation (M)
510.783	2	1019.55	0.0042	0	52.28	LIEVFMPR	Oxidation (M)
570.304	2	1138.59	0.0058	0	63.78	SVDSPVVPDPK
641.805	2	1281.59	0.0076	0	84.54	TPTSWTEAFDK
497.579	3	1489.7	0.0117	1	57.92	LLDDEEFNKPDR
807.381	2	1612.74	0.0106	0	103.92	SDFNSGSFSVNIDPK
828.429	2	1654.85	-0.0018	0	61.74	EVESSDFVLYVGALK
573.004	3	1715.99	-0.0033	0	66.91	VPVLHIVGAPSTSLQAK
463.996	4	1851.95	0.0057	0	30.51	TLHQSYAIHTPQELSK
39	2::AFR98178.1	transaldolase [Cryptococcus neoformans var. grubii H99]	320	35443	6	31.3
39	2::XP_012052888.1	transaldolase [Cryptococcus neoformans var. grubii H99]	320	35443	6	31.3
Peptide exp mz	Peptide exp z	Peptide calc mr	Peptide delta	Peptide Misscleav	Peptide Score	Peptide Sequence	Peptide var Modi
573.336	2	1144.65	0.0075	0	56.93	LLEPAIQYAK
618.848	2	1235.68	0.0048	0	104.5	IASTYEGILAAK
636.325	2	1270.62	0.0161	0	75.38	FSFDTQATINK
543.293	3	1626.85	0.0093	1	76.51	LLDELNKSQDDLPK
589.68	3	1765.99	0.0254	0	54.4	PQDATTNPSLILAAVK	Lys (N-term) [+128.09]
899.944	2	1797.86	0.0107	0	85.94	ATGTTVVADTGDFTSIDK
712.336	3	2133.98	0.0053	0	85.48	ANPDTTYTAENDPGVQSVQK
1068	2	2133.98	0.008	0	34.12	ANPDTTYTAENDPGVQSVQK
39	2::AFR93031.1	fructose-bisphosphate aldolase 1 [Cryptococcus neoformans var. grubii H99]	292	39630	5	23.4
39	2::XP_012047721.1	fructose-bisphosphate aldolase 1 [Cryptococcus neoformans var. grubii H99]	292	39630	5	23.4
Peptide exp mz	Peptide exp z	Peptide calc mr	Peptide delta	Peptide Misscleav	Peptide Score	Peptide Sequence	Peptide var Modi
526.585	3	1576.72	0.0095	1	31.26	EDNIKDCVFYFK
877.477	2	1752.97	-0.034	0	123.58	SGALSVVPAGVITGDNVR	Propyl (N-term) [+42.05]
648.961	3	1943.85	0.0098	0	62.85	MNVDTDTQWAYLCGVR	Oxidation (T) [+15.99]
972.939	2	1943.85	0.0139	0	104.09	MNVDTDTQWAYLCGVR	Oxidation (M)
652.335	3	1953.97	0.0171	0	90.36	NDNQEASIAGAVAAAHFIR
660.315	3	1977.91	0.0117	1	51.45	DYLMTQVGNPDGADKPNK	Oxidation (M)
527.512	4	2106.01	0.0137	2	38.35	DYLMTQVGNPDGADKPNKK	Oxidation (M)
39	2::AFR94883.2	hypothetical protein CNAG_06946 [Cryptococcus neoformans var. grubii H99]	287	39281	6	20.7
39	2::XP_012049004.1	hypothetical protein CNAG_06946 [Cryptococcus neoformans var. grubii H99]	287	39281	6	20.7
Peptide exp mz	Peptide exp z	Peptide calc mr	Peptide delta	Peptide Misscleav	Peptide Score	Peptide Sequence	Peptide var Modi
712.84	2	1423.66	0.0022	0	50.75	GFTEVFGHGGFNR
719.37	2	1436.71	0.0101	1	75.3	LTDEYKDADLVR
479.918	3	1436.71	0.0164	1	75.35	LTDEYKDADLVR
749.899	2	1497.78	0	0	47.25	TEVHPSGAIVVFDK
500.274	3	1497.78	0.0186	0	55.5	TEVHPSGAIVVFDK
824.396	2	1646.77	0.0062	0	76.42	IQCVPESPDSFVNR
592.635	3	1774.87	0.0147	1	45.76	IQCVPESPDSFVNRK
1008.02	2	2014.01	0.0092	0	66.93	TSSPILYILYPESETSSK
672.35	3	2014.01	0.0145	0	41.92	TSSPILYILYPESETSSK
39	2::AFR98659.1	acetolactate synthase, small subunit [Cryptococcus neoformans var. grubii H99]	282	39244	5	19.9
39	2::XP_012053485.1	acetolactate synthase, small subunit [Cryptococcus neoformans var. grubii H99]	282	39244	5	19.9
Peptide exp mz	Peptide exp z	Peptide calc mr	Peptide delta	Peptide Misscleav	Peptide Score	Peptide Sequence	Peptide var Modi
482.752	2	963.477	0.011	0	57.46	TLADQFGGR
609.301	2	1216.58	0.004	0	65.57	SFESAGQPAPAR
783.378	2	1564.74	0.0011	0	31.74	SGTGQDMSASEALIAK
791.377	2	1580.74	0.005	0	91.86	SGTGQDMSASEALIAK	Oxidation (M)
873.954	2	1745.89	0.0072	0	125.82	VVDVAENSCIVELTAK
639.331	3	1914.96	0.0149	1	70.59	TPAPPKPIDDSTSALDYK
39	2::AFR94962.1	cytoplasmic protein [Cryptococcus neoformans var. grubii H99]	256	37997	7	29.6
39	2::XP_012049371.1	cytoplasmic protein [Cryptococcus neoformans var. grubii H99]	256	37997	7	29.6
Peptide exp mz	Peptide exp z	Peptide calc mr	Peptide delta	Peptide Misscleav	Peptide Score	Peptide Sequence	Peptide var Modi
415.757	2	829.491	0.0082	0	45.09	TAVLEIGK
622.351	2	1242.68	0.0047	0	95.74	VVEVQGSVDAIK
663.79	2	1325.56	0.0042	0	54.14	GGSISGPSGVSGER	Phospho (ST) [+79.97]
672.817	2	1343.61	0.0097	0	85.21	TSVAAGFGGYSGDR
740.862	2	1479.7	0.0075	0	43.23	MFTIQGTPEATER
748.862	2	1495.7	0.0123	0	81.08	MFTIQGTPEATER	Oxidation (M)
825.895	2	1649.76	0.0111	1	54.06	RVNGSNSEVPASTDFA
602.65	3	1804.92	0.0098	1	60.08	RPSEGPQVNLNDPNLR
609.318	3	1824.93	0.0026	1	30.29	ALMLLYSQLESEKER	Oxidation (M)
39	2::AFR94637.2	elongation factor 2 [Cryptococcus neoformans var. grubii H99]	216	93334	6	8.4
39	2::XP_012048908.1	elongation factor 2 [Cryptococcus neoformans var. grubii H99]	216	93334	6	8.4
39	2::AGV14286.1	elongation factor 2, variant [Cryptococcus neoformans var. grubii H99]	180	91946	5	7.4
39	2::XP_012049590.1	elongation factor 2, variant [Cryptococcus neoformans var. grubii H99]	180	91946	5	7.4
Peptide exp mz	Peptide exp z	Peptide calc mr	Peptide delta	Peptide Misscleav	Peptide Score	Peptide Sequence	Peptide var Modi
525.789	2	1049.56	0.0024	0	77.65	STLTDSLVSK
546.793	2	1091.56	0.0099	0	79.9	VNFTVDEIR
565.787	2	1129.55	0.0112	0	49.07	LFDSIMNFK	Oxidation (M)
627.307	2	1252.59	0.0122	0	50.27	LWGDNYFNPK
743.38	2	1484.75	-0.0023	0	66.04	AFNMFVLDPIFR	Oxidation (M)
777.375	3	2329.09	0.0143	1	71.81	YRVETLYEGPMDDESAIGIR	Oxidation (M)
525.789	2	1049.56	0.0024	0	77.65	STLTDSLVSK
565.787	2	1129.55	0.0112	0	49.07	LFDSIMNFK	Oxidation (M)
627.307	2	1252.59	0.0122	0	50.27	LWGDNYFNPK
743.38	2	1484.75	-0.0023	0	66.04	AFNMFVLDPIFR	Oxidation (M)
777.375	3	2329.09	0.0143	1	71.81	YRVETLYEGPMDDESAIGIR	Oxidation (M)
39	2::AFR97782.1	glutamate dehydrogenase (NADP) [Cryptococcus neoformans var. grubii H99]	199	49505	5	15.5
39	2::XP_012052614.1	glutamate dehydrogenase (NADP) [Cryptococcus neoformans var. grubii H99]	199	49505	5	15.5
Peptide exp mz	Peptide exp z	Peptide calc mr	Peptide delta	Peptide Misscleav	Peptide Score	Peptide Sequence	Peptide var Modi
570.331	2	1138.63	0.0122	0	63.72	ALDVVQIPER
591.288	2	1180.56	0.0038	0	45.07	NALTGLMMGGGK	Oxidation (M); Ox_CMW (CMW) [+15.99]
735.839	2	1469.66	0.0024	0	103.3	NATDAGVCFYAPGK
580.286	3	1737.83	0.0086	0	66.71	HIGTDTDVPAGDIGTGGR
872.904	2	1743.78	0.0137	0	47.27	YVAEGSNMGCTLDAIK	Oxidation (M)
39	2::AFR93867.1	argininosuccinate lyase [Cryptococcus neoformans var. grubii H99]	154	52598	7	21
39	2::XP_012048159.1	argininosuccinate lyase [Cryptococcus neoformans var. grubii H99]	154	52598	7	21
Peptide exp mz	Peptide exp z	Peptide calc mr	Peptide delta	Peptide Misscleav	Peptide Score	Peptide Sequence	Peptide var Modi
528.794	2	1055.56	0.0121	0	67.11	NPDSLELLR
562.277	2	1122.57	-0.0284	1	78.89	ASEQDFTKR	Trimethyl (Protein N-term A) [+42.05]
597.8	2	1193.58	0.0103	0	55.3	IWLMEETTR	Oxidation (M)
602.8	2	1203.58	0.0078	0	77.8	IVESEWAENK
536.614	3	1606.81	0.013	0	48.15	AGILNEHEQQEIAR
537.958	3	1610.84	0.0094	0	32.88	EVDAILPGYTHLQR
634.971	3	1901.88	0.0153	0	44.17	FLIQSDDEDIHTANER
656.65	3	1966.91	0.0184	0	37.44	FTGSTDPLMHEFNQSLK	Oxidation (M)
39	2::AFR95182.1	transketolase [Cryptococcus neoformans var. grubii H99]	146	74685	4	8.2
39	2::XP_012049657.1	transketolase [Cryptococcus neoformans var. grubii H99]	146	74685	4	8.2
Peptide exp mz	Peptide exp z	Peptide calc mr	Peptide delta	Peptide Misscleav	Peptide Score	Peptide Sequence	Peptide var Modi
596.806	2	1191.59	0.0053	0	53.94	AEAEWQALFK
734.865	2	1467.7	0.0117	0	61.68	FGFNPEESFAVPK
755.386	2	1508.75	0.0095	0	79.39	ALPTYTTSDAAVGSR
617.291	3	1848.84	0.0109	0	58.65	GAEDFQHPSTGLGSYAGR
39	2::AFR97441.1	homoserine dehydrogenase [Cryptococcus neoformans var. grubii H99]	143	39776	6	22.1
39	2::XP_012052199.1	homoserine dehydrogenase [Cryptococcus neoformans var. grubii H99]	143	39776	6	22.1
Peptide exp mz	Peptide exp z	Peptide calc mr	Peptide delta	Peptide Misscleav	Peptide Score	Peptide Sequence	Peptide var Modi
365.232	2	728.443	0.0067	0	46.81	VGVIDVK
524.75	2	1047.48	0.0026	0	54.23	DDLSGTDVAR
536.775	2	1071.52	0.0121	0	54.61	GFSASEALYK
591.809	2	1181.59	0.0109	0	53.31	GSDNIISFTTK
597.385	2	1192.75	0.0006	0	87.32	IPVALLGLGGVGK
435.563	3	1303.66	0.0122	0	42.9	YPADHAFATALK
720.348	2	1438.67	0.0091	0	69.81	LEEGDEFFANLR
655.309	3	1962.89	0.014	1	31.36	GYTEPDPRDDLSGTDVAR
39	2::AFR92184.1	26S proteasome regulatory subunit N8 [Cryptococcus neoformans var. grubii H99]	87	38733	3	11.1
39	2::XP_012046487.1	26S proteasome regulatory subunit N8 [Cryptococcus neoformans var. grubii H99]	87	38733	3	11.1
Peptide exp mz	Peptide exp z	Peptide calc mr	Peptide delta	Peptide Misscleav	Peptide Score	Peptide Sequence	Peptide var Modi
686.844	2	1371.66	0.0104	0	75.32	IQNAQQDIEDAK
628.985	3	1883.92	0.0099	1	31.17	IQNAQQDIEDAKSPAEK
738.042	3	2211.09	0.0166	0	34.89	DISSSSSAPSSSLLTTQSLSTR
39	2::AGV15308.1	glutamine synthetase, variant [Cryptococcus neoformans var. grubii H99]	43	39890	3	12.6
39	2::AFR92589.1	glutamine synthetase [Cryptococcus neoformans var. grubii H99]	43	39890	3	12.6
39	2::XP_012046729.1	glutamine synthetase [Cryptococcus neoformans var. grubii H99]	43	39890	3	12.6
39	2::XP_012046730.1	glutamine synthetase, variant [Cryptococcus neoformans var. grubii H99]	43	39890	3	12.6
Peptide exp mz	Peptide exp z	Peptide calc mr	Peptide delta	Peptide Misscleav	Peptide Score	Peptide Sequence	Peptide var Modi
517.769	2	1033.51	0.0128	0	46.82	GMAAIEDAIK	Oxidation (M)
815.949	2	1629.87	0.0109	0	23.13	VDLLAPYLALDQGSR
737.338	3	2208.98	0.0139	0	28.14	GGANILVLCECYDNDGTPNK
517.769	2	1033.51	0.0128	0	46.82	GMAAIEDAIK	Oxidation (M)
815.949	2	1629.87	0.0109	0	23.13	VDLLAPYLALDQGSR
737.338	3	2208.98	0.0139	0	28.14	GGANILVLCECYDNDGTPNK

## Sheet: ID27537
Gel	Protein Accession	Protein Description	Protein Score	Protein Mass	Matched Peptides	Protein Coverage
37	2::AFR93031.1	fructose-bisphosphate aldolase 1 [Cryptococcus neoformans var. grubii H99]	744	39630	11	56.5
37	2::XP_012047721.1	fructose-bisphosphate aldolase 1 [Cryptococcus neoformans var. grubii H99]	744	39630	11	56.5
Peptide exp mz	Peptide exp z	Peptide calc mr	Peptide delta	Peptide Misscleav	Peptide Score	Peptide Sequence	Peptide var Modi
458.263	2	914.507	0.0042	0	56.95	EAVVNGVVK	Deamidated (NQ) [+0.98]
534.254	2	1066.49	0.0086	0	51.72	MLDLSEESK	Oxidation (M)
692.385	2	1382.75	0.0037	0	75.45	SVVPAGVITGDNVR
769.871	2	1537.71	0.0154	0	119.06	NDNQEASIAGAVAAAH
789.375	2	1576.72	0.0119	1	43.56	EDNIKDCVFYFK
526.587	3	1576.72	0.0145	1	37.64	EDNIKDCVFYFK
812.958	2	1623.89	0.0069	0	70.35	GALSVVPAGVITGDNVR
856.472	2	1710.93	0.0039	0	49.08	SGALSVVPAGVITGDNVR
877.482	2	1752.97	-0.0236	0	121.81	SGALSVVPAGVITGDNVR	Propyl (N-term) [+42.05]
607.649	3	1819.9	0.0197	0	50.38	APAYGVPVVLHSDHCAK
612.981	3	1835.91	0.0096	1	79.6	GLKNDNQEASIAGAVAAAH
927.428	2	1852.84	0.0007	0	100.76	MNVDTDTQWAYLCGVR	Oxidation (M); Cys->Dha (C) [-33.99]
972.939	2	1943.85	0.0137	0	118.72	MNVDTDTQWAYLCGVR	Oxidation (M)
648.963	3	1943.85	0.0166	0	87.54	MNVDTDTQWAYLCGVR	Oxidation (M)
977.995	2	1953.97	0.0103	0	99.82	NDNQEASIAGAVAAAHFIR
652.338	3	1953.97	0.0278	0	88.4	NDNQEASIAGAVAAAHFIR
980.938	2	1959.85	0.0164	0	86.24	MNVDTDTQWAYLCGVR	Oxidation (M); Oxidation (V) [+15.99]
654.295	3	1959.85	0.0179	0	50.42	MNVDTDTQWAYLCGVR	Oxidation (M); Oxidation (V) [+15.99]
660.314	3	1977.91	0.0116	1	74.98	DYLMTQVGNPDGADKPNK	Oxidation (M)
669.68	3	2006	0.015	0	42.3	SVAPAYGVPVVLHSDHCAK
502.515	4	2006	0.0258	0	51.32	SVAPAYGVPVVLHSDHCAK
527.512	4	2106.01	0.0137	2	56.89	DYLMTQVGNPDGADKPNKK	Oxidation (M)
703.014	3	2106.01	0.015	2	65.37	DYLMTQVGNPDGADKPNKK	Oxidation (M)
711.709	3	2132.13	-0.0211	0	56.27	DINSPIILQVSQGGAAFFAGK
1067.08	2	2132.13	0.009	0	105.81	DINSPIILQVSQGGAAFFAGK
730.005	3	2186.98	0.0142	0	21.33	EHGEPLFSSHMLDLSEESK	Oxidation (M)
743.744	3	2228.22	-0.0063	0	23.03	FAIPAINVTSSSVVNAVLEAAR
713.107	4	2848.37	0.0315	1	61.32	YTHEQIGGDEEKPLYLVFHGGSGSTK
37	2::AFR92826.1	UDP-glucose 4-epimerase [Cryptococcus neoformans var. grubii H99]	590	40935	16	45.8
37	2::XP_012046898.1	UDP-glucose 4-epimerase [Cryptococcus neoformans var. grubii H99]	590	40935	16	45.8
Peptide exp mz	Peptide exp z	Peptide calc mr	Peptide delta	Peptide Misscleav	Peptide Score	Peptide Sequence	Peptide var Modi
520.219	2	1038.41	0.0129	0	54.49	EDLESMCR
540.274	2	1078.52	0.0131	0	46.88	DLWNFQTR
580.308	2	1158.59	0.0092	0	79	PNIFSEIDPK
707.87	2	1413.72	0.0084	0	33.33	AMVEEIIHDLTK	Oxidation (M)
472.252	3	1413.72	0.0183	0	51	AMVEEIIHDLTK	Oxidation (M)
759.869	2	1517.72	0.0092	0	79.63	ATGFDYQYEIVGR
763.891	2	1525.76	0.005	0	76.41	GDVPDLTADPSLAQK
777.901	2	1553.77	0.0148	0	122.62	AVGESAELPLSYYR
780.938	2	1559.86	0.0028	0	72.96	VNVAGSISLLEIMAK	Oxidation (M)
792.869	2	1583.71	0.0137	0	107.75	GQGMSVLNMIEAMR	Oxidation (M); 2 Ox_CMW (CMW) [+15.99]
549.612	3	1645.81	0.0047	1	66.41	KATGFDYQYEIVGR
552.297	3	1653.86	0.0124	1	61.35	KGDVPDLTADPSLAQK
834.893	2	1667.76	0.0105	0	94.49	VFGTDFPTPDGTCVR
842.89	2	1683.76	0.0089	0	54.71	VFGTDFPTPDGTCVR	Oxidation (V) [+15.99]
600.619	3	1798.82	0.0133	1	37.59	ELGFVAKEDLESMCR	Oxidation (M)
604.329	3	1809.96	0.0067	2	63.86	RKGDVPDLTADPSLAQK
663.344	3	1987	0.0097	0	34.82	DELGADAPQPILHDLDLR
768.374	3	2302.08	0.0185	0	45.47	YQPIVIDNCHNSYPEALNR
37	2::AGV15308.1	glutamine synthetase, variant [Cryptococcus neoformans var. grubii H99]	505	39890	12	42.7
37	2::AFR92589.1	glutamine synthetase [Cryptococcus neoformans var. grubii H99]	505	39890	12	42.7
37	2::XP_012046729.1	glutamine synthetase [Cryptococcus neoformans var. grubii H99]	505	39890	12	42.7
37	2::XP_012046730.1	glutamine synthetase, variant [Cryptococcus neoformans var. grubii H99]	505	39890	12	42.7
Peptide exp mz	Peptide exp z	Peptide calc mr	Peptide delta	Peptide Misscleav	Peptide Score	Peptide Sequence	Peptide var Modi
509.768	2	1017.52	0.0059	0	42.44	GMAAIEDAIK
517.769	2	1033.51	0.0123	0	59.44	GMAAIEDAIK	Oxidation (M)
693.897	2	1385.78	0.003	0	70.41	VTAILVETTVLNN
732.852	2	1463.68	0.0103	0	91.34	HVGAQGYGYLEDR
488.904	3	1463.68	0.0108	0	82.16	HVGAQGYGYLEDR
782.415	2	1562.81	0.0063	0	47.08	IGEEWGITPSLHPK
521.951	3	1562.81	0.0203	0	36.46	IGEEWGITPSLHPK
815.946	2	1629.87	0.0055	0	70.78	VDLLAPYLALDQGSR
565.934	3	1694.77	0.0113	0	93.15	HETASMTTFSAGVANR	Oxidation (M)
853.433	2	1704.85	0.0036	0	44.62	VQAEYIWVDAEGGIR
594.298	3	1779.85	0.0191	0	48.17	HLEHIAVYGEDNDLR
596.337	3	1785.97	0.0145	1	49.82	RVDLLAPYLALDQGSR
913.425	2	1824.83	0.0108	0	85.95	NGFPGPQGPYYCGVGAGK
634.688	3	1901.04	0.0023	1	42.56	IGEEWGITPSLHPKPLK
1105.5	2	2208.98	0.0103	0	109.93	GGANILVLCECYDNDGTPNK
37	2::AFR92474.1	3~(2~),5~-bisphosphate nucleotidase [Cryptococcus neoformans var. grubii H99]	475	38891	12	33
37	2::XP_012047050.1	3~(2~),5~-bisphosphate nucleotidase [Cryptococcus neoformans var. grubii H99]	475	38891	12	33
Peptide exp mz	Peptide exp z	Peptide calc mr	Peptide delta	Peptide Misscleav	Peptide Score	Peptide Sequence	Peptide var Modi
446.245	2	890.461	0.0136	0	44.05	ELNFGVGR
471.794	2	941.566	0.0075	0	62.94	IGSLLGVQR
509.286	2	1016.55	0.0063	0	52.73	NVQDTLVTK
535.303	2	1068.58	0.011	0	79.64	IGEEIIPNGK
535.793	2	1069.57	0.0066	0	61.02	IGEEIIPNGK	Deamidated (NQ) [+0.98]
566.824	2	1131.63	0.0057	0	79.01	VIGLVNGGFEK
567.316	2	1132.61	0.0038	0	63.5	VIGLVNGGFEK	Deamidated (NQ) [+0.98]
614.872	2	1227.72	0.011	0	64.07	ETQIGILSVLR
570.956	3	1709.84	0.0056	0	49.91	FWTIDPVDGTSGFIR
855.932	2	1709.84	0.0079	0	127.3	FWTIDPVDGTSGFIR
871.926	2	1741.83	0.0054	0	48.01	FWTIDPVDGTSGFIR	DiOx (CFMPWY) [+31.99]
585.621	3	1753.83	0.0153	1	39.76	GEGSWSRPLDSATYTK
606.99	3	1817.93	0.0185	1	64.52	VIGLVNGGFEKEEGWGK
688.029	3	2061.05	0.0137	2	30.43	VIGLVNGGFEKEEGWGKDK
516.275	4	2061.05	0.0186	2	53.22	VIGLVNGGFEKEEGWGKDK
704.333	3	2109.97	0.0077	0	73.68	TFSEEDILSAIDAGSAEGGNK
1056	2	2109.97	0.0106	0	67.85	TFSEEDILSAIDAGSAEGGNK
785.379	3	2353.09	0.0216	1	47.06	DKTFSEEDILSAIDAGSAEGGNK
37	2::AFR97763.1	chlorophyll synthesis pathway protein BchC [Cryptococcus neoformans var. grubii H99]	433	38489	9	32.4
37	2::XP_012052598.1	chlorophyll synthesis pathway protein BchC [Cryptococcus neoformans var. grubii H99]	433	38489	9	32.4
Peptide exp mz	Peptide exp z	Peptide calc mr	Peptide delta	Peptide Misscleav	Peptide Score	Peptide Sequence	Peptide var Modi
466.261	2	930.502	0.0051	0	54.04	AIDLLDSGK
493.236	2	984.455	0.0018	0	68.93	DGGFADYIK
426.905	3	1277.69	0.0051	0	53.24	FPLVPGHEAVGR
661.825	2	1321.63	0.0027	0	43.45	EMNALLYSEPR
669.825	2	1337.63	0.0071	0	41.65	EMNALLYSEPR	Oxidation (M)
707.373	2	1412.72	0.0124	0	95.47	GGTLLVYGVYEDK
509.939	3	1526.79	0.0087	0	71.01	MGGASHITIAANAGIK	Oxidation (M)
788.388	2	1574.76	0.0056	0	61.24	IIGSFSQTYCFPR
801.917	2	1601.81	0.0104	0	30.43	LPGWSPTDIFVNEK
644.603	3	1930.78	0.0099	0	58.72	IAADVGETCGYCHYCR
37	2::AFR97441.1	homoserine dehydrogenase [Cryptococcus neoformans var. grubii H99]	425	39776	10	45.3
37	2::XP_012052199.1	homoserine dehydrogenase [Cryptococcus neoformans var. grubii H99]	425	39776	10	45.3
Peptide exp mz	Peptide exp z	Peptide calc mr	Peptide delta	Peptide Misscleav	Peptide Score	Peptide Sequence	Peptide var Modi
446.765	2	891.507	0.0093	0	35.25	YVGVIDVK
536.779	2	1071.52	0.0201	0	54.65	GFSASEALYK
583.297	2	1164.57	0.0137	0	52.08	GSDNIISFTTK	Ammonia-loss (N) [-17.03]
591.811	2	1181.59	0.015	0	71.16	GSDNIISFTTK
595.305	2	1188.59	0.0076	0	40.28	DLVATGDEIEK
597.396	2	1192.75	0.0224	0	96.56	IPVALLGLGGVGK
652.842	2	1303.66	0.0142	0	75.66	YPADHAFATALK
435.566	3	1303.66	0.0189	0	67.36	YPADHAFATALK
720.347	2	1438.67	0.0071	0	116.55	LEEGDEFFANLR
556.023	4	2220.03	0.0324	2	40.67	EKGYTEPDPRDDLSGTDVAR
778.73	3	2333.16	0.0077	0	147.06	PLIIQGAGAGADVTAMGVTSDMVK	Oxidation (M); Ox_CMW (CMW) [+15.99]
812.46	3	2434.35	0.0114	0	55.54	QSLSLPLPAAPITPANFQSILEK
887.816	3	2660.41	0.0188	0	23.06	SFPNTPSLAYGESTVGAGLPIIQTLK
37	2::AFR97929.1	hsp71-like protein [Cryptococcus neoformans var. grubii H99]	388	69759	8	17.1
37	2::AFR97952.1	hsp72-like protein [Cryptococcus neoformans var. grubii H99]	388	69698	8	17.1
37	2::XP_012052712.1	hsp71-like protein [Cryptococcus neoformans var. grubii H99]	388	69759	8	17.1
37	2::XP_012052733.1	hsp72-like protein [Cryptococcus neoformans var. grubii H99]	388	69698	8	17.1
Peptide exp mz	Peptide exp z	Peptide calc mr	Peptide delta	Peptide Misscleav	Peptide Score	Peptide Sequence	Peptide var Modi
514.249	2	1026.48	0.0035	0	45.22	LVSDMFSGR	Oxidation (M)
585.828	2	1169.64	0.0021	0	76.82	DAGAIAGLDVLR
709.39	2	1416.76	0.0085	0	113.81	SSVNEIVLVGGSTR
743.848	2	1485.67	0.0074	0	72	TTPSYVAFNDSER
783.897	2	1565.78	-0.0037	0	57.28	AVVTVPAYFNDSQR
559.252	3	1674.72	0.0112	0	46.41	ATAGDTHLGGEDFDNR
864.411	2	1726.8	0.009	0	138.27	NQVAMNPYNTVFDAK	Oxidation (M)
596.672	3	1786.98	0.0124	1	92.67	IINEPTAAAIAYGLDKK
37	2::AFR93041.1	dehydrogenase [Cryptococcus neoformans var. grubii H99]	378	40282	10	34.3
37	2::XP_012047716.1	dehydrogenase [Cryptococcus neoformans var. grubii H99]	378	40282	10	34.3
Peptide exp mz	Peptide exp z	Peptide calc mr	Peptide delta	Peptide Misscleav	Peptide Score	Peptide Sequence	Peptide var Modi
440.216	2	878.413	0.0036	0	45.17	GNFEDIGK
471.737	2	941.449	0.0095	0	61.7	AFGEEVYK
594.791	2	1187.56	0.0068	0	48.01	SDPQIPQTMR	Oxidation (M)
711.344	2	1420.66	0.012	0	87.9	VEYAAQNPTDWK
512.268	3	1533.77	0.0134	1	40.91	GNFEDIGKGLEDLK
769.419	2	1536.81	0.0096	0	86.91	QLNATLPVPEEAQK
519.946	3	1556.8	0.0129	0	38.95	VLGVCSPHSFDLVK
562.246	3	1683.7	0.0145	0	53.97	SYGADATVDYHDQDK
605.953	3	1814.83	0.0048	0	58.86	GVEYALDTISQDDSFR
908.427	2	1814.83	0.0075	0	112.83	GVEYALDTISQDDSFR
767.384	3	2299.13	0.0046	0	94.77	HAVDQSLPGVINGCDYAGTVVK
767.712	3	2300.11	0.002	0	83.23	HAVDQSLPGVINGCDYAGTVVK	Deamidated (NQ) [+0.98]
772.719	3	2315.12	0.0122	0	75.5	HAVDQSLPGVINGCDYAGTVVK	Oxidation (D) [+15.99]
37	2::AFR94072.1	6-phosphogluconate dehydrogenase, decarboxylating 1 [Cryptococcus neoformans var. grubii H99]	311	54192	8	25.5
37	2::XP_012048411.1	6-phosphogluconate dehydrogenase, decarboxylating 1 [Cryptococcus neoformans var. grubii H99]	311	54192	8	25.5
Peptide exp mz	Peptide exp z	Peptide calc mr	Peptide delta	Peptide Misscleav	Peptide Score	Peptide Sequence	Peptide var Modi
549.263	2	1096.51	0.0024	0	37.65	DFFGAHTFR
671.86	2	1341.69	0.0126	0	81.05	SVFLSDITAAYR
720.898	2	1439.77	0.0078	0	74.77	TETLPANLIQGQR
796.413	2	1590.8	0.012	0	125.16	GLLFVGSGVSGGEEGAR
567.288	3	1698.84	0.005	0	45.7	GTNVIGAHSVQELCSK
628.643	3	1882.89	0.0167	0	61.62	VNDWHLNNAGIAAMWR	Oxidation (M)
632.3	3	1893.87	0.0099	0	56.12	NGPSLMPGGSDDAWPHIK	Oxidation (M)
870.049	3	2607.11	0.0129	0	62.07	TAAQAQGEPCCDWVGETGSGHYVK
37	2::AFR98009.2	mannose-1-phosphate guanyltransferase [Cryptococcus neoformans var. grubii H99]	257	40211	8	28.8
37	2::XP_012052460.1	mannose-1-phosphate guanyltransferase [Cryptococcus neoformans var. grubii H99]	257	40211	8	28.8
Peptide exp mz	Peptide exp z	Peptide calc mr	Peptide delta	Peptide Misscleav	Peptide Score	Peptide Sequence	Peptide var Modi
403.732	2	805.445	0.0055	0	50.54	LVGGFGTR
458.252	2	914.486	0.0031	0	52.31	PLVEFCNK	Cys->Dha (C) [-33.99]
460.274	2	918.529	0.0046	0	57.02	ILVGGFGTR
503.757	2	1005.5	0.0039	0	49.38	PLVEFCNK
516.818	2	1031.61	0.0081	0	54.25	LILVGGFGTR
538.786	2	1075.55	0.0074	0	74.01	SISSSITEPR
552.336	2	1102.65	0.0066	0	68.99	ALILVGGFGTR
583.789	2	1165.56	0.0052	0	59.73	CVIMSNATVR	Oxidation (M)
697.381	2	1392.74	0.007	0	76.48	GIYIFNPSVLDR
474.261	3	1419.75	0.0109	1	49.7	FVEKPVEFVGNR
710.889	2	1419.75	0.0131	1	53.94	FVEKPVEFVGNR
732.897	2	1463.78	0.0027	0	45.74	AGIYIFNPSVLDR
846.461	2	1690.9	0.0028	0	64.85	INAGIYIFNPSVLDR
667.005	3	1997.97	0.0222	0	65.64	DHSWIANSIVGWNSTVGR
734.741	3	2201.17	0.0314	1	60.22	VAEPSAYGVVVTKPNSTVIDR
37	2::AFR92615.2	actin [Cryptococcus neoformans var. grubii H99]	215	42307	5	21.5
37	2::XP_012046325.1	actin [Cryptococcus neoformans var. grubii H99]	215	42307	5	21.5
Peptide exp mz	Peptide exp z	Peptide calc mr	Peptide delta	Peptide Misscleav	Peptide Score	Peptide Sequence	Peptide var Modi
388.232	2	774.439	0.0099	0	52.29	FPSIVGR
582.306	2	1162.59	0.0062	0	44.58	EITALAPSSMK	Oxidation (M)
630.308	2	1258.59	0.0076	0	69.75	YDESGPSIVHR
738.342	2	1474.67	0.0007	0	41.6	SEYDESGPSIVHR
492.569	3	1474.67	0.0154	0	77.91	SEYDESGPSIVHR
895.953	2	1789.88	0.0059	0	110.89	SYELPDGQVITIGNER
652.032	3	1953.06	0.0155	0	47.54	VAPEEHPVLLTEAPLNPK
654.974	3	1961.88	0.0161	0	56.18	YPIEHGIVTNWDDMEK	Oxidation (M)
37	2::AFR95182.1	transketolase [Cryptococcus neoformans var. grubii H99]	214	74685	6	12.1
37	2::XP_012049657.1	transketolase [Cryptococcus neoformans var. grubii H99]	214	74685	6	12.1
Peptide exp mz	Peptide exp z	Peptide calc mr	Peptide delta	Peptide Misscleav	Peptide Score	Peptide Sequence	Peptide var Modi
476.27	2	950.519	0.0066	0	44.57	TTIGFGSLR
492.793	2	983.565	0.0064	0	39.94	DAPTIINLK
596.809	2	1191.59	0.012	0	82.06	AEAEWQALFK
667.852	2	1333.69	0.0026	0	66.27	LGNLVAIYDDNK
734.861	2	1467.7	0.0049	0	79.58	FGFNPEESFAVPK
755.383	2	1508.75	0.0044	0	95.38	ALPTYTTSDAAVGSR
832.919	2	1663.85	-0.0299	0	110.9	ANFSSNDITAVNTIR	Trimethyl (Protein N-term A) [+42.05]
37	2::AFR97782.1	glutamate dehydrogenase (NADP) [Cryptococcus neoformans var. grubii H99]	212	49505	6	17.5
37	2::XP_012052614.1	glutamate dehydrogenase (NADP) [Cryptococcus neoformans var. grubii H99]	212	49505	6	17.5
Peptide exp mz	Peptide exp z	Peptide calc mr	Peptide delta	Peptide Misscleav	Peptide Score	Peptide Sequence	Peptide var Modi
564.809	2	1127.6	0.0029	0	36.28	FLGFEQIFK
570.327	2	1138.63	0.0042	0	53.87	ALDVVQIPER
591.289	2	1180.59	-0.028	0	58.47	NALTGLMMGGGK	Oxidation (M); Met->Phe (M) [+16.03]
735.841	2	1469.66	0.0072	0	99.34	NATDAGVCFYAPGK
580.285	3	1737.83	0.0047	0	59.41	HIGTDTDVPAGDIGTGGR
872.899	2	1743.78	0.0027	0	75.15	YVAEGSNMGCTLDAIK	Oxidation (M)
37	2::AFR97558.1	pyruvate decarboxylase [Cryptococcus neoformans var. grubii H99]	197	68079	6	10.1
37	2::XP_012052124.1	pyruvate decarboxylase [Cryptococcus neoformans var. grubii H99]	197	68079	6	10.1
Peptide exp mz	Peptide exp z	Peptide calc mr	Peptide delta	Peptide Misscleav	Peptide Score	Peptide Sequence	Peptide var Modi
435.245	2	868.477	-0.0005	0	61.82	GDAPAGLIR
452.245	2	902.464	0.0106	0	51.22	LVDACGIR
486.732	2	971.442	0.0071	0	48.22	FFETPMGK	Oxidation (M)
570.304	2	1138.59	0.0073	0	77.58	SVDSPVVPDPK
497.578	3	1489.7	0.0081	1	66.16	LLDDEEFNKPDR
807.381	2	1612.74	0.0112	0	67.66	SDFNSGSFSVNIDPK
37	2::AFR95034.1	xenobiotic reductase [Cryptococcus neoformans var. grubii H99]	181	41535	4	15.4
37	2::XP_012049323.1	xenobiotic reductase [Cryptococcus neoformans var. grubii H99]	181	41535	4	15.4
Peptide exp mz	Peptide exp z	Peptide calc mr	Peptide delta	Peptide Misscleav	Peptide Score	Peptide Sequence	Peptide var Modi
522.781	2	1043.54	0.0067	0	62.59	LIDVWGADR
547.314	2	1092.61	0.0058	0	55.19	GGLIVAQLWH
707.345	2	1412.67	0.006	0	77.26	SGDPVWAPSDVGAR
707.367	2	1412.71	0.0039	0	69.26	SIPTTVPNEDNVK
736.399	2	1470.78	0.0082	0	86.41	IQEGLPLAEINMK	Oxidation (M)
37	2::AFR95702.1	NAD-binding Rossmann fold oxidoreductase [Cryptococcus neoformans var. grubii H99]	158	43719	5	15.2
37	2::XP_012049956.1	NAD-binding Rossmann fold oxidoreductase [Cryptococcus neoformans var. grubii H99]	158	43719	5	15.2
Peptide exp mz	Peptide exp z	Peptide calc mr	Peptide delta	Peptide Misscleav	Peptide Score	Peptide Sequence	Peptide var Modi
558.766	2	1115.51	0.0038	0	54.03	FTAYVEDGSK
457.236	3	1368.68	0.0071	0	67.37	VAENYAHEPALR
690.344	2	1378.66	0.011	0	68.98	EAVELIEEYER
729.435	2	1456.85	0.0017	0	42.66	EIDAVLFVLPITK
788.436	2	1574.86	0.002	0	54.55	FITTLIPAEGSGLEK
37	2::AFR96330.1	hypothetical protein CNAG_03106 [Cryptococcus neoformans var. grubii H99]	157	43359	4	15.6
37	2::XP_012051029.1	hypothetical protein CNAG_03106 [Cryptococcus neoformans var. grubii H99]	157	43359	4	15.6
Peptide exp mz	Peptide exp z	Peptide calc mr	Peptide delta	Peptide Misscleav	Peptide Score	Peptide Sequence	Peptide var Modi
497.293	2	992.566	0.0056	0	61.22	SLTGLSLFR
558.785	2	1115.55	0.0089	0	47.19	ELEGLGDVER
574.295	2	1146.57	0.0052	0	84.64	EGGLDLLMQR	Oxidation (M)
730.874	2	1459.73	0.0025	0	84	LEIEAYANDPAVR
697.685	3	2090.02	0.01	0	50.42	ELLAWEPPAPEQGTPYHR
37	2::AFR94515.1	glucose-methanol-choline oxidoreductase [Cryptococcus neoformans var. grubii H99]	147	65625	4	9.5
37	2::XP_012048807.1	glucose-methanol-choline oxidoreductase [Cryptococcus neoformans var. grubii H99]	147	65625	4	9.5
Peptide exp mz	Peptide exp z	Peptide calc mr	Peptide delta	Peptide Misscleav	Peptide Score	Peptide Sequence	Peptide var Modi
648.341	2	1294.66	0.0077	0	69.19	IQNVVYMVGEK	Oxidation (M)
696.878	2	1391.73	0.0114	0	59.31	EVIVAQGVYESAK
832.414	2	1662.81	0.0007	0	79.8	SDLEALSIQCVVDSK
596.65	3	1786.92	0.0073	0	36.54	DIDHGVVSPELSVHGVK
37	2::AFR99095.1	branched-chain-amino-acid transaminase [Cryptococcus neoformans var. grubii H99]	135	42948	3	9.8
37	2::XP_012053920.1	branched-chain-amino-acid transaminase [Cryptococcus neoformans var. grubii H99]	135	42948	3	9.8
Peptide exp mz	Peptide exp z	Peptide calc mr	Peptide delta	Peptide Misscleav	Peptide Score	Peptide Sequence	Peptide var Modi
557.304	2	1112.59	0.0061	0	88.7	LPADFTPAPGK
761.408	2	1520.79	0.0148	0	65.81	SQDYTIPFNPLVK
784.365	2	1566.7	0.0134	0	51.49	AFPFADGNVEMPEK	Oxidation (M)
37	2::AFR97455.1	large subunit ribosomal protein L4e [Cryptococcus neoformans var. grubii H99]	120	39589	3	16.3
37	2::XP_012052190.1	large subunit ribosomal protein L4e [Cryptococcus neoformans var. grubii H99]	120	39589	3	16.3
Peptide exp mz	Peptide exp z	Peptide calc mr	Peptide delta	Peptide Misscleav	Peptide Score	Peptide Sequence	Peptide var Modi
434.788	2	867.554	0.0068	0	44.83	LPSLVLAR
521.786	2	1041.55	0.0071	0	54.14	EFLEILHAA
718.066	3	2151.16	0.0111	1	44.27	LINSDEIQSVVRPAGQAVQK
764.354	3	2290.04	0.0051	0	79.99	QAYAVAENAGHQTSAESWGTGR
37	2::AFR99027.1	hypothetical protein CNAG_05599 [Cryptococcus neoformans var. grubii H99]	103	38036	3	10.4
37	2::XP_012053872.1	hypothetical protein CNAG_05599 [Cryptococcus neoformans var. grubii H99]	103	38036	3	10.4
Peptide exp mz	Peptide exp z	Peptide calc mr	Peptide delta	Peptide Misscleav	Peptide Score	Peptide Sequence	Peptide var Modi
452.73	2	903.445	-0.0004	0	45.08	AQWDGSLK
678.827	2	1355.62	0.0172	0	90.64	SPMGSGEFLLMR	Oxidation (M); Ox_CMW (CMW) [+15.99]
820.937	2	1639.86	0.0021	0	44.78	DVSGLPEIFPINPSR
37	2::AFR93294.1	tubulin alpha-1A chain [Cryptococcus neoformans var. grubii H99]	70	50293	3	6.7
37	2::XP_012047454.1	tubulin alpha-1A chain [Cryptococcus neoformans var. grubii H99]	70	50293	3	6.7
Peptide exp mz	Peptide exp z	Peptide calc mr	Peptide delta	Peptide Misscleav	Peptide Score	Peptide Sequence	Peptide var Modi
398.219	2	794.417	0.0058	0	50.24	LSIDYGK
575.811	2	1149.61	0.0011	0	48.75	LEFSVYPAPK
799.892	2	1597.76	0.0098	0	47.58	TIQFVDWCPTGFK
37	2::AFR95638.1	D-lactaldehyde dehydrogenase [Cryptococcus neoformans var. grubii H99]	50	38303	3	12.4
37	2::XP_012049997.1	D-lactaldehyde dehydrogenase [Cryptococcus neoformans var. grubii H99]	50	38303	3	12.4
Peptide exp mz	Peptide exp z	Peptide calc mr	Peptide delta	Peptide Misscleav	Peptide Score	Peptide Sequence	Peptide var Modi
549.802	2	1097.58	0.006	0	48.88	ALTVPEAGGQR
890.449	2	1778.86	0.0213	0	29.93	LNTSVASFWSWPAGEK
656.979	3	1967.89	0.0204	0	33.44	YHTPEETVVDMFESLR	Oxidation (M)
Gel	Protein Accession	Protein Description	Protein Score	Protein Mass	Matched Peptides	Protein Coverage
39	2::AFR95702.1	NAD-binding Rossmann fold oxidoreductase [Cryptococcus neoformans var. grubii H99]	680	43719	17	37
39	2::XP_012049956.1	NAD-binding Rossmann fold oxidoreductase [Cryptococcus neoformans var. grubii H99]	680	43719	17	37
Peptide exp mz	Peptide exp z	Peptide calc mr	Peptide delta	Peptide Misscleav	Peptide Score	Peptide Sequence	Peptide var Modi
425.742	2	849.46	0.0102	0	46.75	FAGDILSK
513.266	2	1024.51	0.0096	0	59.75	LDSAVYTEK
558.772	2	1115.51	0.0163	0	59.2	FTAYVEDGSK
409.243	3	1224.7	0.0108	0	24.02	TLVLHTIWSR
615.833	2	1229.65	0.001	1	63.95	EINLESLVKGE
620.828	2	1239.63	0.0069	1	61.83	SKLDSAVYTEK
628.821	2	1255.62	0.0117	0	82.34	DLASQPGQSTPR
635.816	2	1269.61	0.0074	0	63.02	AENYAHEPALR
457.236	3	1368.68	0.0067	0	57.36	VAENYAHEPALR
685.35	2	1368.68	0.0074	0	54.91	VAENYAHEPALR
690.345	2	1378.66	0.0138	0	81.32	EAVELIEEYER
477.93	3	1430.76	0.0056	1	63.44	SDGKEINLESLVK
729.438	2	1456.85	0.0066	0	48.23	EIDAVLFVLPITK
750.422	2	1498.82	0.0104	0	52.01	TPNLGPVLFWDIK
788.442	2	1574.86	0.0131	0	59.45	FITTLIPAEGSGLEK
539.954	3	1616.83	0.0132	2	41.83	SDGKEINLESLVKGE
568.661	3	1702.95	0.0102	1	48.78	FITTLIPAEGSGLEKK
940.441	2	1878.86	0.0111	0	110.01	GQITFSFANPDMPPEGR	Oxidation (M)
627.297	3	1878.86	0.012	0	70.42	GQITFSFANPDMPPEGR	Oxidation (M)
755.047	3	2262.11	0.0054	1	105	LDSAVYTEKDLASQPGQSTPR
39	2::AFR92826.1	UDP-glucose 4-epimerase [Cryptococcus neoformans var. grubii H99]	429	40935	14	41.6
39	2::XP_012046898.1	UDP-glucose 4-epimerase [Cryptococcus neoformans var. grubii H99]	429	40935	14	41.6
Peptide exp mz	Peptide exp z	Peptide calc mr	Peptide delta	Peptide Misscleav	Peptide Score	Peptide Sequence	Peptide var Modi
540.271	2	1078.52	0.0071	0	45.95	DLWNFQTR
580.303	2	1158.59	-0.0008	0	75.47	PNIFSEIDPK
390.55	3	1168.62	0.008	1	33.14	VGAEEGKPNLR
724.35	2	1446.68	0.0071	0	91.43	TGFDYQYEIVGR
759.868	2	1517.72	0.0068	0	79.57	ATGFDYQYEIVGR
763.886	2	1525.76	-0.0044	0	49.4	GDVPDLTADPSLAQK
777.899	2	1553.77	0.0112	0	109.27	AVGESAELPLSYYR
792.866	2	1583.71	0.0074	0	103.73	GQGMSVLNMIEAMR	2 Oxidation (M); Ox_CMW (CMW) [+15.99]
528.917	3	1583.74	-0.0134	0	59.47	GQGMSVLNMIEAMR	2 Oxidation (M); Met->Phe (M) [+16.03]
549.613	3	1645.81	0.0074	1	64.39	KATGFDYQYEIVGR
552.295	3	1653.86	0.0069	1	66.88	KGDVPDLTADPSLAQK
834.891	2	1667.76	0.0053	0	79.02	VFGTDFPTPDGTCVR
842.888	2	1683.76	0.0055	0	49.47	VFGTDFPTPDGTCVR	Oxidation (V) [+15.99]
600.618	3	1798.82	0.0104	1	31.71	ELGFVAKEDLESMCR	Oxidation (M)
604.332	3	1809.96	0.0143	2	55.68	RKGDVPDLTADPSLAQK
663.346	3	1987	0.0163	0	28.77	DELGADAPQPILHDLDLR
768.371	3	2302.08	0.0111	0	38.01	YQPIVIDNCHNSYPEALNR
39	2::AFR93294.1	tubulin alpha-1A chain [Cryptococcus neoformans var. grubii H99]	361	50293	10	30.8
39	2::XP_012047454.1	tubulin alpha-1A chain [Cryptococcus neoformans var. grubii H99]	361	50293	10	30.8
Peptide exp mz	Peptide exp z	Peptide calc mr	Peptide delta	Peptide Misscleav	Peptide Score	Peptide Sequence	Peptide var Modi
398.214	2	794.417	-0.0029	0	50.53	LSIDYGK
521.791	2	1041.56	0.0113	0	68.57	DVNAAVANIR
575.811	2	1149.61	0	0	72.01	LEFSVYPAPK
653.844	2	1305.67	0.0052	0	50.43	GITSPSFTNLNR
459.57	3	1375.68	0.0079	0	43.18	SLFHPETMITGK	Oxidation (M)
767.408	2	1532.79	0.0067	0	47.03	NLGITSPSFTNLNR
799.891	2	1597.76	0.0076	0	72.72	TIQFVDWCPTGFK
880.961	2	1759.9	0.0081	0	40.98	SLYVDLEPNVIDEVR
596.039	4	2380.11	0.0171	1	61.78	SLFHPETMITGKEDAANNYAR	Oxidation (M)
1242.53	2	2483.04	0.0072	0	24.45	LMEGSPSANDDGFSTFFSETGSGK	Oxidation (M)
828.691	3	2483.04	0.0076	0	113.01	LMEGSPSANDDGFSTFFSETGSGK	Oxidation (M)
973.398	3	2917.17	0.0052	0	78.92	AFHESNSVYEMTMSCFESNNQMVK	3 Oxidation (M)
39	2::AFR97952.1	hsp72-like protein [Cryptococcus neoformans var. grubii H99]	313	69698	9	17.8
39	2::XP_012052733.1	hsp72-like protein [Cryptococcus neoformans var. grubii H99]	313	69698	9	17.8
Peptide exp mz	Peptide exp z	Peptide calc mr	Peptide delta	Peptide Misscleav	Peptide Score	Peptide Sequence	Peptide var Modi
585.831	2	1169.64	0.006	0	71.34	DAGAIAGLDVLR
709.388	2	1416.76	0.0047	0	95.77	SSVNEIVLVGGSTR
743.849	2	1485.67	0.0091	0	66.62	TTPSYVAFNDSER
783.903	2	1565.78	0.0081	0	57.38	AVVTVPAYFNDSQR
799.906	2	1597.79	0.0061	0	48.89	TFTPEEISSMVLTK	Oxidation (M)
534.27	3	1599.78	0.0063	1	64.37	MKETAEAYLGGTVSK	Oxidation (M)
830.454	2	1658.89	0.0048	0	58	IINEPTAAAIAYGLDK
864.411	2	1726.8	0.0083	0	99.1	NQVAMNPYNTVFDAK	Oxidation (M)
596.674	3	1786.98	0.0169	1	55.55	IINEPTAAAIAYGLDKK
39	2::AFR92468.1	hsp75-like protein [Cryptococcus neoformans var. grubii H99]	249	67372	6	12.7
39	2::XP_012046659.1	hsp75-like protein [Cryptococcus neoformans var. grubii H99]	249	67372	6	12.7
Peptide exp mz	Peptide exp z	Peptide calc mr	Peptide delta	Peptide Misscleav	Peptide Score	Peptide Sequence	Peptide var Modi
592.839	2	1183.66	0.0069	0	54.72	DAGAIAGLEVLR
615.841	2	1229.66	0.0049	0	88.04	VDDIVLVGGSTR
678.357	2	1354.69	0.0116	0	87.05	IQSLVSEYFGGR
729.352	2	1456.68	0.0065	0	66.15	TTPSYVAFTEGER
783.903	2	1565.78	0.0081	0	57.38	AVVTVPAYFNDSQR
840.409	2	1678.8	0.0041	0	91.11	NQSAMNPLNTIFDAK	Oxidation (M)
39	2::AFR97929.1	hsp71-like protein [Cryptococcus neoformans var. grubii H99]	291	69759	8	15.6
39	2::XP_012052712.1	hsp71-like protein [Cryptococcus neoformans var. grubii H99]	291	69759	8	15.6
Peptide exp mz	Peptide exp z	Peptide calc mr	Peptide delta	Peptide Misscleav	Peptide Score	Peptide Sequence	Peptide var Modi
585.831	2	1169.64	0.006	0	71.34	DAGAIAGLDVLR
709.388	2	1416.76	0.0047	0	95.77	SSVNEIVLVGGSTR
743.849	2	1485.67	0.0091	0	66.62	TTPSYVAFNDSER
783.903	2	1565.78	0.0081	0	57.38	AVVTVPAYFNDSQR
534.27	3	1599.78	0.0063	1	64.37	MKETAEAYLGGTVSK	Oxidation (M)
830.454	2	1658.89	0.0048	0	58	IINEPTAAAIAYGLDK
864.411	2	1726.8	0.0083	0	99.1	NQVAMNPYNTVFDAK	Oxidation (M)
596.674	3	1786.98	0.0169	1	55.55	IINEPTAAAIAYGLDKK
39	2::AFR93031.1	fructose-bisphosphate aldolase 1 [Cryptococcus neoformans var. grubii H99]	302	39630	8	35.4
39	2::XP_012047721.1	fructose-bisphosphate aldolase 1 [Cryptococcus neoformans var. grubii H99]	302	39630	8	35.4
Peptide exp mz	Peptide exp z	Peptide calc mr	Peptide delta	Peptide Misscleav	Peptide Score	Peptide Sequence	Peptide var Modi
599.333	2	1196.65	0.0003	0	65.29	VPAGVITGDNVR
411.547	3	1231.62	-0.0045	1	28.93	VKEACVDLGNK
692.386	2	1382.75	0.0056	0	84.76	SVVPAGVITGDNVR
476.603	3	1426.78	0.0094	1	43.87	DEIREAVVNGVVK
526.586	3	1576.72	0.0132	1	37.61	EDNIKDCVFYFK
585.321	3	1752.97	-0.0316	0	52.11	SGALSVVPAGVITGDNVR	Propyl (N-term) [+42.05]
877.481	2	1752.97	-0.0265	0	126.3	SGALSVVPAGVITGDNVR	Propyl (N-term) [+42.05]
972.936	2	1943.85	0.0069	0	119.16	MNVDTDTQWAYLCGVR	Oxidation (M)
648.962	3	1943.85	0.0147	0	77.15	MNVDTDTQWAYLCGVR	Oxidation (N) [+15.99]
652.338	3	1953.97	0.0267	0	78.66	NDNQEASIAGAVAAAHFIR
980.932	2	1959.85	0.0048	0	82.57	MNVDTDTQWAYLCGVR	Oxidation (M); Oxidation (V) [+15.99]
654.298	3	1959.85	0.0264	0	45.34	MNVDTDTQWAYLCGVR	Oxidation (M); Oxidation (L) [+15.99]
660.314	3	1977.91	0.0103	1	71.1	DYLMTQVGNPDGADKPNK	Oxidation (M)
502.512	4	2006	0.0135	0	36.32	SVAPAYGVPVVLHSDHCAK
703.012	3	2106.01	0.0093	2	53.13	DYLMTQVGNPDGADKPNKK	Oxidation (M)
527.513	4	2106.01	0.0183	2	46.21	DYLMTQVGNPDGADKPNKK	Oxidation (M)
39	2::AFR94072.1	6-phosphogluconate dehydrogenase, decarboxylating 1 [Cryptococcus neoformans var. grubii H99]	275	54192	6	19.1
39	2::XP_012048411.1	6-phosphogluconate dehydrogenase, decarboxylating 1 [Cryptococcus neoformans var. grubii H99]	275	54192	6	19.1
Peptide exp mz	Peptide exp z	Peptide calc mr	Peptide delta	Peptide Misscleav	Peptide Score	Peptide Sequence	Peptide var Modi
671.854	2	1341.69	0.0002	0	74.46	SVFLSDITAAYR
720.896	2	1439.77	0.0042	0	86.03	TETLPANLIQGQR
731.363	2	1460.72	-0.0032	0	54.49	IISYAQGFMLMR	Oxidation (M); Ox_CMW (CMW) [+15.99]
796.409	2	1590.8	0.0038	0	117.76	GLLFVGSGVSGGEEGAR
567.29	3	1698.84	0.0126	0	26.42	GTNVIGAHSVQELCSK
870.05	3	2607.11	0.0159	0	28.11	TAAQAQGEPCCDWVGETGSGHYVK
39	2::AFR97558.1	pyruvate decarboxylase [Cryptococcus neoformans var. grubii H99]	254	68079	8	15.6
39	2::XP_012052124.1	pyruvate decarboxylase [Cryptococcus neoformans var. grubii H99]	254	68079	8	15.6
Peptide exp mz	Peptide exp z	Peptide calc mr	Peptide delta	Peptide Misscleav	Peptide Score	Peptide Sequence	Peptide var Modi
469.743	2	937.469	0.0016	0	77.49	FGMALEVR	Oxidation (M)
486.73	2	971.442	0.0025	0	53.18	FFETPMGK	Oxidation (M)
570.304	2	1138.59	0.0056	0	77.56	SVDSPVVPDPK
641.807	2	1281.59	0.0116	0	58.03	TPTSWTEAFDK
497.576	3	1489.7	0.0022	1	51.78	LLDDEEFNKPDR
807.379	2	1612.74	0.007	0	102.53	SDFNSGSFSVNIDPK
828.434	2	1654.85	0.0076	0	43.11	EVESSDFVLYVGALK
573.009	3	1715.99	0.0111	0	27.82	VPVLHIVGAPSTSLQAK
39	2::AFR94515.1	glucose-methanol-choline oxidoreductase [Cryptococcus neoformans var. grubii H99]	230	65625	8	20.6
39	2::XP_012048807.1	glucose-methanol-choline oxidoreductase [Cryptococcus neoformans var. grubii H99]	230	65625	8	20.6
Peptide exp mz	Peptide exp z	Peptide calc mr	Peptide delta	Peptide Misscleav	Peptide Score	Peptide Sequence	Peptide var Modi
539.242	2	1076.46	0.013	0	38.99	EYDFYANR
591.799	2	1181.58	0.0078	0	46.1	QNVVYMVGEK	Oxidation (M)
648.339	2	1294.66	0.0046	0	77.21	IQNVVYMVGEK	Oxidation (M)
696.877	2	1391.73	0.0093	0	77.94	EVIVAQGVYESAK
744.374	2	1486.72	0.0123	0	80.81	GGSTALNYYTWVR
520.266	3	1557.78	-0.0011	0	40.49	GHELTVDVYNGVQK
780.403	2	1558.78	0.0099	0	46.79	VADASVFPLIPDCR
832.421	2	1662.81	0.0131	0	97.86	SDLEALSIQCVVDSK
596.651	3	1786.92	0.0105	0	25.65	DIDHGVVSPELSVHGVK
612.963	3	1835.86	0.0108	0	45.24	STTYHDDLGLFPDDIK
39	2::AFR95199.1	argininosuccinate synthase [Cryptococcus neoformans var. grubii H99]	206	47687	7	17.9
39	2::XP_012049202.1	argininosuccinate synthase [Cryptococcus neoformans var. grubii H99]	206	47687	7	17.9
Peptide exp mz	Peptide exp z	Peptide calc mr	Peptide delta	Peptide Misscleav	Peptide Score	Peptide Sequence	Peptide var Modi
477.243	2	952.465	0.0069	0	44.41	LPEFYER
483.272	2	964.523	0.0064	0	60.2	SALLEYAAK
548.74	2	1095.47	-0.0067	0	46.42	DADEGLYDAK
638.353	2	1274.69	0.0039	0	55.43	EFITAAIPASQK
669.33	2	1336.64	0.0001	0	44.97	GCYESPAATILR
677.329	2	1352.64	0.0042	0	62.62	GCYESPAATILR	Ox (CFHMPWY) [+15.99]
486.577	3	1456.7	0.0127	0	69.49	AAHMDLEGLTLDR	Oxidation (M)
729.363	2	1456.7	0.0127	0	20.8	AAHMDLEGLTLDR	Oxidation (M)
503.939	3	1508.78	0.0123	1	68.65	LTVSPEKAPDAPER
39	2::AFR97763.1	chlorophyll synthesis pathway protein BchC [Cryptococcus neoformans var. grubii H99]	203	38489	5	16.6
39	2::XP_012052598.1	chlorophyll synthesis pathway protein BchC [Cryptococcus neoformans var. grubii H99]	203	38489	5	16.6
Peptide exp mz	Peptide exp z	Peptide calc mr	Peptide delta	Peptide Misscleav	Peptide Score	Peptide Sequence	Peptide var Modi
466.256	2	930.502	-0.004	0	57.9	AIDLLDSGK
493.238	2	984.455	0.0054	0	51.25	DGGFADYIK
669.825	2	1337.63	0.0066	0	33.2	EMNALLYSEPR	Oxidation (M)
707.373	2	1412.72	0.0126	0	77.81	GGTLLVYGVYEDK
509.938	3	1526.79	0.0063	0	67.46	MGGASHITIAANAGIK	Oxidation (M)
39	2::AFR94353.1	mitochondrial protein [Cryptococcus neoformans var. grubii H99]	201	80503	6	10
39	2::XP_012048874.1	mitochondrial protein [Cryptococcus neoformans var. grubii H99]	201	80503	6	10
Peptide exp mz	Peptide exp z	Peptide calc mr	Peptide delta	Peptide Misscleav	Peptide Score	Peptide Sequence	Peptide var Modi
570.826	2	1139.63	0.0083	0	67.52	VPGDSVGAVLAR
594.304	2	1186.59	-0.0001	0	52.99	AQDDLTALNAR
595.33	2	1188.63	0.0098	0	55.48	ALSSDATGILNK
615.804	2	1229.59	0.0043	0	41.31	ELEGELEQQR
724.377	2	1446.73	0.0074	0	78.35	SLSTPTASSGEGVVR
725.847	2	1449.67	0.0066	0	91.36	VDSGDLAFDNELR
39	2::AFR96924.1	phosphoribosylformylglycinamidine synthase [Cryptococcus neoformans var. grubii H99]	195	146278	5	5.9
39	2::XP_012051651.1	phosphoribosylformylglycinamidine synthase [Cryptococcus neoformans var. grubii H99]	195	146278	5	5.9
Peptide exp mz	Peptide exp z	Peptide calc mr	Peptide delta	Peptide Misscleav	Peptide Score	Peptide Sequence	Peptide var Modi
582.291	2	1162.56	0.0051	0	50.79	YLPDVTDANR
728.871	2	1455.72	0.003	0	113.77	YVDGTGAIATTYPK
745.324	2	1488.62	0.0097	0	52.25	ESFSWFPEEMGK	Oxidation (M)
747.39	2	1492.76	0.0059	0	61.62	LFNEELGAVMQVK	Oxidation (M)
776.389	2	1550.77	-0.0099	0	43.04	GQLQQLWAETSYK
862.445	2	1722.86	0.0102	0	52.97	NPNGGPEGIAAVSTLNGR
39	2::AFR94627.1	saccharopine dehydrogenase (NAD, L-lysine forming) [Cryptococcus neoformans var. grubii H99]	191	43708	5	17
39	2::XP_012049596.1	saccharopine dehydrogenase (NAD, L-lysine forming) [Cryptococcus neoformans var. grubii H99]	191	43708	5	17
Peptide exp mz	Peptide exp z	Peptide calc mr	Peptide delta	Peptide Misscleav	Peptide Score	Peptide Sequence	Peptide var Modi
515.286	2	1028.55	0.0075	0	84.41	AGVAEENIVK
525.253	2	1048.48	0.0159	0	67.86	CGSGAVDLFR	Cyano (C) [+25.00]
541.26	2	1080.5	0.0042	0	64.98	CGSGAVDLFR
593.804	2	1185.59	0.0048	0	71.2	QQAGWNDVLR
753.873	2	1505.72	0.0074	0	50.59	EASEQFSADLLPSL
573.961	3	1718.85	0.0048	1	46.03	LGELKPYPNEGEMVK	Oxidation (M)
659.996	3	1976.95	0.0145	1	45.61	AGVAEENIVKWDMAETAK	Oxidation (M)
39	2::AFR96921.1	succinate dehydrogenase [ubiquinone] flavoprotein subunit, mitochondrial [Cryptococcus neoformans var. grubii H99]	172	70454	7	11.8
39	2::XP_012051649.1	succinate dehydrogenase [ubiquinone] flavoprotein subunit, mitochondrial [Cryptococcus neoformans var. grubii H99]	172	70454	7	11.8
Peptide exp mz	Peptide exp z	Peptide calc mr	Peptide delta	Peptide Misscleav	Peptide Score	Peptide Sequence	Peptide var Modi
481.74	2	961.46	0.0061	0	51.28	ESIEELDK
578.286	2	1154.54	0.0177	0	43.59	TMQTDAAVFR	Oxidation (M)
620.837	2	1239.66	0.0025	0	60.54	NASGPLPTSQIR
683.818	2	1365.62	0.0048	0	79.14	GEGGYLVNSEGER
719.859	2	1437.7	0.0054	0	53.34	YTGEVLTVDEQGK
561.283	3	1680.82	0.0061	1	45.28	YTGEVLTVDEQGKDK
655.324	3	1962.94	0.0059	0	28.42	HTLSFQHDPNSPDVELK
39	2::AFR92551.1	S-adenosylmethionine synthase [Cryptococcus neoformans var. grubii H99]	160	43341	3	10.8
39	2::XP_012046704.1	S-adenosylmethionine synthase [Cryptococcus neoformans var. grubii H99]	160	43341	3	10.8
Peptide exp mz	Peptide exp z	Peptide calc mr	Peptide delta	Peptide Misscleav	Peptide Score	Peptide Sequence	Peptide var Modi
558.799	2	1115.58	0.0005	0	75.19	SDAELVDVIR
722.885	2	1443.75	0.0081	0	111.41	FVIGGPQGDAGLTGR
675.317	3	2022.92	0.007	0	43.87	TAAYGHFGNPAYSWEQPK
39	2::AFR95034.1	xenobiotic reductase [Cryptococcus neoformans var. grubii H99]	156	41535	4	12.8
39	2::XP_012049323.1	xenobiotic reductase [Cryptococcus neoformans var. grubii H99]	156	41535	4	12.8
Peptide exp mz	Peptide exp z	Peptide calc mr	Peptide delta	Peptide Misscleav	Peptide Score	Peptide Sequence	Peptide var Modi
522.78	2	1043.54	0.0055	0	54.38	LIDVWGADR
707.344	2	1412.67	0.0056	0	76.42	SGDPVWAPSDVGAR
707.369	2	1412.71	0.0082	0	44.12	SIPTTVPNEDNVK
736.398	2	1470.78	0.0059	0	94.22	IQEGLPLAEINMK	Oxidation (M)
39	2::AFR92615.2	actin [Cryptococcus neoformans var. grubii H99]	143	42307	4	15.1
39	2::XP_012046325.1	actin [Cryptococcus neoformans var. grubii H99]	143	42307	4	15.1
Peptide exp mz	Peptide exp z	Peptide calc mr	Peptide delta	Peptide Misscleav	Peptide Score	Peptide Sequence	Peptide var Modi
488.726	2	975.441	-0.0037	0	66.62	AGFAGDDAPR
492.568	3	1474.67	0.015	0	82.89	SEYDESGPSIVHR
895.952	2	1789.88	0.0046	0	54.1	SYELPDGQVITIGNER
652.031	3	1953.06	0.0138	0	47.37	VAPEEHPVLLTEAPLNPK
39	2::AFR97782.1	glutamate dehydrogenase (NADP) [Cryptococcus neoformans var. grubii H99]	139	49505	3	9.3
39	2::XP_012052614.1	glutamate dehydrogenase (NADP) [Cryptococcus neoformans var. grubii H99]	139	49505	3	9.3
Peptide exp mz	Peptide exp z	Peptide calc mr	Peptide delta	Peptide Misscleav	Peptide Score	Peptide Sequence	Peptide var Modi
570.325	2	1138.63	0.0007	0	46.06	ALDVVQIPER
735.839	2	1469.66	0.0018	0	99.6	NATDAGVCFYAPGK
580.286	3	1737.83	0.007	0	56.96	HIGTDTDVPAGDIGTGGR
39	2::AFR98435.1	heat shock 70kDa protein 4 [Cryptococcus neoformans var. grubii H99]	127	85923	4	9.2
39	2::XP_012053205.1	heat shock 70kDa protein 4 [Cryptococcus neoformans var. grubii H99]	127	85923	4	9.2
Peptide exp mz	Peptide exp z	Peptide calc mr	Peptide delta	Peptide Misscleav	Peptide Score	Peptide Sequence	Peptide var Modi
552.807	2	1103.6	0.0015	0	54.36	TPSLVSFTPR
578.336	2	1154.65	0.0036	0	46.83	VSVPLAEALEK
593.295	2	1184.57	0.0073	0	55.54	ADLPESTEAPR
664.867	2	1327.71	0.0097	0	78.25	GIDIIVNEVSNR
701.38	2	1400.75	-0.0053	0	82.23	ASVVGIDLGNLSSK	Acetyl (S) [+42.01]
538.584	3	1612.73	0.0057	1	54.81	SFNDPEVEEYEKK
39	2::AFR93954.1	T-complex protein 1 subunit theta [Cryptococcus neoformans var. grubii H99]	125	58614	5	10.1
39	2::XP_012048096.1	T-complex protein 1 subunit theta [Cryptococcus neoformans var. grubii H99]	125	58614	5	10.1
Peptide exp mz	Peptide exp z	Peptide calc mr	Peptide delta	Peptide Misscleav	Peptide Score	Peptide Sequence	Peptide var Modi
479.769	2	957.524	-0.0004	0	48.75	VLGGGLEASR
532.776	2	1063.53	0.0075	0	37.92	AEDLLNFSR
545.28	2	1088.55	-0.0007	0	61.95	SLDDGINTVR
614.856	2	1227.69	0.0069	0	82.6	LVAEAALAVMPK	Oxidation (M)
691.887	2	1381.76	0.0027	0	49.29	LVPGAGASEIELAR
39	2::AFR95182.1	transketolase [Cryptococcus neoformans var. grubii H99]	81	74685	3	6
39	2::XP_012049657.1	transketolase [Cryptococcus neoformans var. grubii H99]	81	74685	3	6
Peptide exp mz	Peptide exp z	Peptide calc mr	Peptide delta	Peptide Misscleav	Peptide Score	Peptide Sequence	Peptide var Modi
596.804	2	1191.59	0.0014	0	57.73	AEAEWQALFK
734.862	2	1467.7	0.0063	0	27.04	FGFNPEESFAVPK
617.292	3	1848.84	0.0158	0	44.62	GAEDFQHPSTGLGSYAGR
39	2::AFR98009.2	mannose-1-phosphate guanyltransferase [Cryptococcus neoformans var. grubii H99]	79	40211	3	11.8
39	2::XP_012052460.1	mannose-1-phosphate guanyltransferase [Cryptococcus neoformans var. grubii H99]	79	40211	3	11.8
Peptide exp mz	Peptide exp z	Peptide calc mr	Peptide delta	Peptide Misscleav	Peptide Score	Peptide Sequence	Peptide var Modi
538.784	2	1075.55	0.0022	0	79.46	SISSSITEPR
474.261	3	1419.75	0.0097	1	39.32	FVEKPVEFVGNR
734.735	3	2201.17	0.0148	1	30.49	VAEPSAYGVVVTKPNSTVIDR
39	2::AFR94380.2	sarcosine oxidase [Cryptococcus neoformans var. grubii H99]	63	49685	4	10.5
39	2::XP_012048509.1	sarcosine oxidase [Cryptococcus neoformans var. grubii H99]	63	49685	4	10.5
Peptide exp mz	Peptide exp z	Peptide calc mr	Peptide delta	Peptide Misscleav	Peptide Score	Peptide Sequence	Peptide var Modi
581.787	2	1161.56	-0.0034	0	43.25	TQVTDTGADVR
584.29	2	1166.55	0.0187	0	37.45	GNAFPTGSFGGR
603.328	2	1204.63	0.0083	0	43.22	GLSEVYPELAK
466.594	3	1396.76	0.0046	1	27.4	TKLTPGAEDGAIPK
39	2::AFR95720.1	fatty acid synthase subunit beta, fungi type [Cryptococcus neoformans var. grubii H99]	59	275733	3	1.4
39	2::XP_012049942.1	fatty acid synthase subunit beta, fungi type [Cryptococcus neoformans var. grubii H99]	59	275733	3	1.4
Peptide exp mz	Peptide exp z	Peptide calc mr	Peptide delta	Peptide Misscleav	Peptide Score	Peptide Sequence	Peptide var Modi
499.243	2	996.47	0.0009	0	45.26	TFNEMALR	Oxidation (M)
580.817	2	1159.61	0.01	0	28.01	EIVDTISQQK
821.957	2	1641.88	0.0235	0	44.8	LIEVGPSPVLSGMATR	Oxidation (M)
39	2::AGV14729.1	pyruvate kinase, variant [Cryptococcus neoformans var. grubii H99]	58	57396	3	6
39	2::AFR98016.2	pyruvate kinase [Cryptococcus neoformans var. grubii H99]	58	61939	3	5.6
39	2::XP_012052462.1	pyruvate kinase [Cryptococcus neoformans var. grubii H99]	58	61939	3	5.6
39	2::XP_012052782.1	pyruvate kinase, variant [Cryptococcus neoformans var. grubii H99]	58	57396	3	6
Peptide exp mz	Peptide exp z	Peptide calc mr	Peptide delta	Peptide Misscleav	Peptide Score	Peptide Sequence	Peptide var Modi
499.779	2	997.544	-0.0018	0	59.64	VLGPEGADIK
572.314	2	1142.62	-0.0047	0	37.07	TAVDLPALSEK
673.856	2	1345.68	0.0145	0	27.18	GVYPVWFPEPR
39	2::AGV14792.1	transcription factor C subunit 7, variant [Cryptococcus neoformans var. grubii H99]	55	39081	3	8.2
39	2::AFR98460.2	transcription factor C subunit 7 [Cryptococcus neoformans var. grubii H99]	55	39081	3	8.2
39	2::XP_012053054.1	transcription factor C subunit 7 [Cryptococcus neoformans var. grubii H99]	55	39081	3	8.2
39	2::XP_012053222.1	transcription factor C subunit 7, variant [Cryptococcus neoformans var. grubii H99]	55	39081	3	8.2
Peptide exp mz	Peptide exp z	Peptide calc mr	Peptide delta	Peptide Misscleav	Peptide Score	Peptide Sequence	Peptide var Modi
523.269	2	1044.52	-0.0016	0	35.84	SNWVDPSIK
611.329	2	1220.62	0.0246	0	31.96	AEIFIDAWTR
619.83	2	1237.63	0.0111	0	44.13	YDYLPLGLER

## Sheet: ID27684
Gel	Protein Accession	Protein Description	Protein Score	Protein Mass	Matched Peptides	Protein Coverage
37	2::AFR94296.1	3-oxoacid CoA-transferase [Cryptococcus neoformans var. grubii H99]	912	60034	14	36.2
37	2::XP_012048673.1	3-oxoacid CoA-transferase [Cryptococcus neoformans var. grubii H99]	912	60034	14	36.2
Peptide exp mz	Peptide exp z	Peptide calc mr	Peptide delta	Peptide Misscleav	Peptide Score	Peptide Sequence	Peptide var Modi
430.757	2	859.492	0.0074	0	44.77	TFGPLVAR
436.215	2	870.406	0.0101	0	48.35	MPGFFTR	Oxidation (M)
463.789	2	925.56	0.0033	0	45.91	QTIAIPGVK
495.767	2	989.518	0.0023	0	47.47	EIEIFTTR	Glu->pyro-Glu (N-term E) [-18.01]
564.35	2	1126.67	0.0142	0	82.49	LPLTGVSVVSR
575.304	2	1148.59	0.0036	0	62.4	GILGMGPYPTK	Oxidation (M)
578.311	2	1154.6	0.0077	0	62.46	MILSYLGTNK	Oxidation (M)
599.79	2	1197.56	0.0054	0	72.97	AAGAGMPGFFTR	Oxidation (M)
637.324	2	1272.62	0.0133	0	90.69	EEVDADIINAGK
647.84	2	1293.67	-0.0015	0	49.54	AGTHVETGGIPQK
688.879	2	1375.73	0.0092	0	102.5	IITDLAVFDVDR
726.879	2	1451.74	0.0059	0	33.5	TGAGTHVETGGIPQK
484.926	3	1451.74	0.0184	0	38.85	TGAGTHVETGGIPQK
811.369	2	1620.71	0.0112	0	70.45	GMGGAMDLVSNPDETK
819.362	2	1636.71	0.0021	0	102.1	GMGGAMDLVSNPDETK	Oxidation (M)
827.364	2	1652.7	0.0113	0	140.46	GMGGAMDLVSNPDETK	Oxidation (M); Ox_CMW (CMW) [+15.99]
616.665	3	1846.97	0.0064	1	74.27	VVPATEDKEIEIFTTR
636.951	3	1907.82	0.0075	0	74.06	EENENVSPSSGEETSVSK
954.924	2	1907.82	0.01	0	104.25	EENENVSPSSGEETSVSK
996.498	2	1990.98	-0.0005	0	79.18	VWVQSENGILGMGPYPTK	Oxidation (M)
664.671	3	1990.98	0.0091	0	102.88	VWVQSENGILGMGPYPTK	Oxidation (M)
664.998	3	1991.98	-0.0085	0	54.88	VWVQSENGILGMGPYPTK	Oxidation (M); Label:15N(1) (G) [+1.00]
782.383	3	2344.13	0.0014	0	68.91	ETVTLVPGASVFDSSESFGMIR	Oxidation (M)
1196.62	2	2391.23	-0.0063	0	49.36	DLTVVSNNAGNAGTYGLSPLITSK
798.085	3	2391.23	0.0037	0	99.59	DLTVVSNNAGNAGTYGLSPLITSK
37	2::AFR94515.1	glucose-methanol-choline oxidoreductase [Cryptococcus neoformans var. grubii H99]	704	65625	19	41
37	2::XP_012048807.1	glucose-methanol-choline oxidoreductase [Cryptococcus neoformans var. grubii H99]	704	65625	19	41
Peptide exp mz	Peptide exp z	Peptide calc mr	Peptide delta	Peptide Misscleav	Peptide Score	Peptide Sequence	Peptide var Modi
382.719	2	763.412	0.0123	0	38.88	IIFEDK
497.766	2	993.513	0.0038	0	50.24	STAAAFLEGK
530.83	2	1059.64	0.0085	0	61.01	ILMLSGIGIK	Oxidation (M)
539.24	2	1076.46	0.0094	0	39.07	EYDFYANR
603.313	2	1204.61	0.0037	1	69.85	STAAAFLEGKPN
616.353	2	1230.68	0.0094	0	49.67	PNITLASSTISK
628.826	2	1255.63	0.0064	0	25.12	DGFGLDNHLLR
419.554	3	1255.63	0.0087	0	59.4	DGFGLDNHLLR
648.337	2	1294.66	0.0001	0	54.1	IQNVVYMVGEK	Oxidation (M)
657.359	2	1312.7	0.0049	0	64.2	TAVGVTVIGPDER
462.229	3	1383.65	0.0201	1	38.27	TTMIDRPDYTR	Oxidation (M)
696.879	2	1391.73	0.0131	0	76.08	EVIVAQGVYESAK
743.834	2	1485.65	0.0046	0	84.46	FVDDVLMNGEGMK	Oxidation (M); Ox_CMW (CMW) [+15.99]
779.898	2	1557.78	0.0022	0	59.96	GHELTVDVYNGVQK
520.271	3	1557.78	0.0115	0	67.33	GHELTVDVYNGVQK
780.399	2	1558.78	0.002	0	54.79	VADASVFPLIPDCR
832.415	2	1662.81	0.0027	0	130.71	SDLEALSIQCVVDSK
555.281	3	1662.81	0.0078	0	83.42	SDLEALSIQCVVDSK
839.371	2	1676.73	-0.0053	0	54.59	DIVECDYPWPMPR
847.374	2	1692.73	0.0064	0	87.51	DIVECDYPWPMPR	Oxidation (M)
850.446	2	1698.87	0.0038	0	74.08	VLGGSTALNYYTWVR
596.65	3	1786.92	0.0071	0	39.93	DIDHGVVSPELSVHGVK
612.962	3	1835.86	0.008	0	37.31	STTYHDDLGLFPDDIK
934.466	2	1866.9	0.012	0	121.33	NFDFIVLGGGAGGCTVAGR
37	2::AFR97558.1	pyruvate decarboxylase [Cryptococcus neoformans var. grubii H99]	615	68079	16	35.5
37	2::XP_012052124.1	pyruvate decarboxylase [Cryptococcus neoformans var. grubii H99]	615	68079	16	35.5
Peptide exp mz	Peptide exp z	Peptide calc mr	Peptide delta	Peptide Misscleav	Peptide Score	Peptide Sequence	Peptide var Modi
413.283	2	824.548	0.0026	0	36.44	TILPLLR
435.248	2	868.477	0.0058	0	62.31	GDAPAGLIR
452.243	2	902.464	0.0069	0	56.4	LVDACGIR
454.242	2	906.463	0.0066	0	53.53	IEVFMPR	Oxidation (M)
461.747	2	921.474	0.0048	0	82.56	FGMALEVR
469.747	2	937.469	0.0097	0	73.35	FGMALEVR	Oxidation (M)
478.733	2	955.447	0.0031	0	59.35	FFETPMGK
486.732	2	971.442	0.0068	0	56.18	FFETPMGK	Oxidation (M)
502.785	2	1003.55	0.0033	0	41.55	LIEVFMPR
510.783	2	1019.55	0.0036	0	46.18	LIEVFMPR	Oxidation (M)
512.262	2	1022.51	0.0003	0	30.14	HEWLWPR
514.799	2	1027.57	0.0096	1	45.66	KPIILVDAC
570.306	2	1138.59	0.0103	0	54.77	SVDSPVVPDPK
570.328	2	1138.63	0.0072	0	84.89	QALINNIEPK
610.288	2	1218.55	0.0084	0	62.4	SVDSPVVPDPK	Phospho (ST) [+79.97]
613.843	2	1225.67	0.0052	0	73.39	SQALINNIEPK
640.284	2	1278.55	0.0087	0	82.98	HPLYGGCYAGAN
641.808	2	1281.59	0.013	0	97.34	TPTSWTEAFDK
642.32	2	1282.62	0.0054	0	69.54	PGYVEVPTDAVH
661.327	2	1320.63	0.0079	0	86.5	VLNNDGYEIER
494.93	3	1481.75	0.0183	0	61.09	PGYVEVPTDAVHAK
497.582	3	1489.7	0.0187	1	74.6	LLDDEEFNKPDR
791.403	2	1580.78	0.0071	0	106.7	IFVLNNDGYEIER
807.379	2	1612.74	0.0054	0	107.17	SDFNSGSFSVNIDPK
538.59	3	1612.74	0.0104	0	66.17	SDFNSGSFSVNIDPK
828.432	2	1654.85	0.0032	0	104.47	EVESSDFVLYVGALK
830.42	2	1658.82	0.01	0	68.31	TTTIGYASYPTTDIR
618.33	3	1851.95	0.0208	0	30.24	TLHQSYAIHTPQELSK
712.356	3	2134.05	-0.0009	0	56.34	GVHPYIFVLNNDGYEIER
585.553	4	2338.17	0.0073	1	37.43	AVLEQCRPGYVEVPTDAVHAK
37	2::AFR97935.1	pre-mRNA-processing factor 19 [Cryptococcus neoformans var. grubii H99]	544	54371	8	26.6
37	2::XP_012052717.1	pre-mRNA-processing factor 19 [Cryptococcus neoformans var. grubii H99]	544	54371	8	26.6
Peptide exp mz	Peptide exp z	Peptide calc mr	Peptide delta	Peptide Misscleav	Peptide Score	Peptide Sequence	Peptide var Modi
409.223	2	816.423	0.0082	0	44.81	EDLVDVK
505.8	2	1009.58	0.0037	0	59.98	SPPTVPVVSK
530.773	2	1059.53	-0.0044	0	48.92	QELANALYR	Gln->pyro-Glu (N-term Q) [-17.03]
539.293	2	1076.56	0.0095	0	78.8	QELANALYR
543.303	2	1084.59	0.0048	0	65.52	SLAATLSSHAK
603.827	2	1205.63	0.0107	0	81.11	AVQVFDLEASK
608.306	2	1214.59	0.008	0	44.95	QSNSLAATLSSH
626.305	2	1250.59	0.0025	0	86.75	METNQALSSVR	Oxidation (M)
630.838	2	1259.65	0.007	0	55.48	LGSEIVLAGMDR
638.836	2	1275.65	0.0089	0	89.11	LGSEIVLAGMDR	Oxidation (M)
667.848	2	1333.67	0.0162	0	86.08	VMETNQALSSVR
669.888	2	1337.76	0.0052	0	79.02	AISGSPPTVPVVSK
675.843	2	1349.66	0.0106	0	92.13	VMETNQALSSVR	Oxidation (M)
570.623	3	1708.84	0.0042	0	54.16	FDPSAQFLSVVGTDAR
855.431	2	1708.84	0.0044	0	95.27	FDPSAQFLSVVGTDAR
916.955	2	1831.88	0.0117	0	133.69	YIEENGADPISGEPLTK
917.449	2	1832.87	0.0159	0	120.01	YIEENGADPISGEPLTK	Deamidated (NQ) [+0.98]
728.713	3	2183.11	0.0115	0	124.06	PAGITALDLAQDGNTVVTGGADK
37	2::AFR95026.1	pyruvate dehydrogenase complex dihydrolipoamide acetyltransferase [Cryptococcus neoformans var. grubii H99]	456	50598	9	27.7
37	2::XP_012049327.1	pyruvate dehydrogenase complex dihydrolipoamide acetyltransferase [Cryptococcus neoformans var. grubii H99]	456	50598	9	27.7
Peptide exp mz	Peptide exp z	Peptide calc mr	Peptide delta	Peptide Misscleav	Peptide Score	Peptide Sequence	Peptide var Modi
495.779	2	989.539	0.004	0	65.92	GLATISAETK
506.275	2	1010.53	0.0072	0	50.99	LELAPEDPK
510.793	2	1019.57	0.0064	0	42.39	LSVNDFVVK
629.829	2	1257.64	0.0045	1	58.2	KADICVAVATPN
690.912	2	1379.8	0.0066	0	72.64	IALENGIPLAEIK
691.402	2	1380.79	0.0035	0	49.49	IALENGIPLAEIK	Deamidated (NQ) [+0.98]
717.321	2	1432.63	0.0019	0	39.9	EYMEQPLTFML	2 Oxidation (M)
774.369	2	1546.72	0.0075	0	88.33	PAAIAADYEDIPTSN
793.91	2	1585.79	0.011	0	101.62	SQSSTTPAVGIPGEQK
917.938	2	1833.86	0.0055	0	64.14	PAAIAADYEDIPTSNMR
617.627	3	1849.85	0.0089	0	70.07	PAAIAADYEDIPTSNMR	Oxidation (M)
925.938	2	1849.85	0.0106	0	140.61	PAAIAADYEDIPTSNMR	Oxidation (M)
669.996	3	2006.95	0.0147	0	78.27	QQLPHYYVTVEVNMDR	Oxidation (M)
1051.48	2	2100.93	0.005	0	14.39	FAMPAMSPTMTEGGIAQWK	3 Oxidation (M)
701.322	3	2100.93	0.0124	0	63.89	FAMPAMSPTMTEGGIAQWK	3 Oxidation (M)
37	2::AGV14729.1	pyruvate kinase, variant [Cryptococcus neoformans var. grubii H99]	390	57396	13	29.3
37	2::AFR98016.2	pyruvate kinase [Cryptococcus neoformans var. grubii H99]	390	61939	13	27.1
37	2::XP_012052462.1	pyruvate kinase [Cryptococcus neoformans var. grubii H99]	390	61939	13	27.1
37	2::XP_012052782.1	pyruvate kinase, variant [Cryptococcus neoformans var. grubii H99]	390	57396	13	29.3
Peptide exp mz	Peptide exp z	Peptide calc mr	Peptide delta	Peptide Misscleav	Peptide Score	Peptide Sequence	Peptide var Modi
418.732	2	835.444	0.0063	0	46.78	SDLAFGVK
450.283	2	898.549	0.0017	0	50	SIIATIGPK
471.291	2	940.559	0.0083	0	77.58	PIAIALDTK
499.783	2	997.544	0.0065	0	80.13	VLGPEGADIK
500.809	2	999.596	0.0072	0	74.04	TSIIATIGPK
523.262	2	1044.5	0.0114	0	46.85	WQIDVDNR
540.292	2	1078.57	0.0044	1	42.33	DKSDLAFGVK
572.321	2	1142.62	0.0095	0	58.27	TAVDLPALSEK
673.851	2	1345.68	0.0046	0	63.87	GVYPVWFPEPR
787.357	2	1572.69	0.0084	0	60.82	ATQMLESMTYNPR	2 Oxidation (M)
910.466	2	1818.92	-0.0007	0	46.54	GDLGIEIPASQVFMAQK	Oxidation (M)
608.297	3	1821.86	0.0116	0	77.57	IENEQGVMNFDEILR	Oxidation (M)
911.946	2	1821.86	0.0207	0	92.79	IENEQGVMNFDEILR	Oxidation (M)
659.685	3	1976.02	0.0125	0	45.93	ILSVPSDPADLDLHSIER
681.652	3	2041.93	0.0073	0	101.33	PVICATQMLESMTYNPR	2 Oxidation (M)
711.667	3	2131.97	0.0106	0	22.99	DDTDVPISAGHEFWVTTDK
37	2::AFR98086.1	5-methyltetrahydropteroyltriglutamate-homocysteine S-methyltransferase [Cryptococcus neoformans var. grubii H99]	260	85607	10	16
37	2::XP_012052830.1	5-methyltetrahydropteroyltriglutamate-homocysteine S-methyltransferase [Cryptococcus neoformans var. grubii H99]	260	85607	10	16
Peptide exp mz	Peptide exp z	Peptide calc mr	Peptide delta	Peptide Misscleav	Peptide Score	Peptide Sequence	Peptide var Modi
444.74	2	887.46	0.0063	0	36.72	DEVVDLAK
551.312	2	1100.61	0.0021	0	93.79	VAAITEEQLK
556.311	2	1110.6	0.0047	0	56.66	AIQVDEPAIR
613.286	2	1224.55	0.0059	0	58.72	GEITQEEYEK
630.838	2	1259.66	0.0005	0	61.7	LDADVISIEASK
712.878	2	1423.73	0.0069	0	57.96	FPTTTIGSFPQTK
475.95	3	1424.82	0.0046	1	50.42	QLEEVVAAIKPTK
723.379	2	1444.74	0.0019	0	74.81	ETEESLANLVAAAK
498.918	3	1493.73	0.0031	0	47.3	CGLDLLVHGEPER
704.336	3	2109.98	0.0109	0	46.26	SYGYSNEIGPGVYDIHSPR
37	2::AFR95008.1	aconitate hydratase, mitochondrial [Cryptococcus neoformans var. grubii H99]	243	86776	8	15
37	2::XP_012049341.1	aconitate hydratase, mitochondrial [Cryptococcus neoformans var. grubii H99]	243	86776	8	15
Peptide exp mz	Peptide exp z	Peptide calc mr	Peptide delta	Peptide Misscleav	Peptide Score	Peptide Sequence	Peptide var Modi
482.281	2	962.544	0.0047	0	60.43	VIGVYLDGK
512.765	2	1023.51	0.0024	0	35.55	HSWPQELK
529.24	2	1056.46	0.0033	0	59.35	NDANPATHAF
536.222	2	1070.42	0.0079	0	36.68	DGMVDDFEK	Oxidation (M)
542.812	2	1083.6	0.0051	0	85.4	IENNLQVVR
591.807	2	1181.59	0.0069	1	46.03	KGEANSIITSY
617.83	2	1233.64	0.0093	0	45.7	FTITPGSEQVR
647.342	2	1292.66	0.008	0	63.87	IEINLSELEPH
655.821	2	1309.62	0.0081	0	50.74	FSDPSGYELPAK
694.334	2	1386.65	0.0036	0	62.53	EVYDFLATACAK
946.415	2	1890.81	0.0063	0	121.66	VGLIGSCTNSSYEDMSR	Oxidation (M)
37	2::AFR98685.2	mitochondrial splicing suppressor [Cryptococcus neoformans var. grubii H99]	169	62041	5	11.5
37	2::XP_012053337.1	mitochondrial splicing suppressor [Cryptococcus neoformans var. grubii H99]	169	62041	5	11.5
Peptide exp mz	Peptide exp z	Peptide calc mr	Peptide delta	Peptide Misscleav	Peptide Score	Peptide Sequence	Peptide var Modi
497.239	2	992.456	0.0077	0	43.95	GFPSIDSDR
602.297	2	1202.57	0.0064	0	53.74	WEIAEWDVR
627.807	2	1253.6	0.004	0	45.74	SVSLCPTSFEK
692.873	2	1383.72	0.0065	0	88.11	GQVLLDGSEEPLK
681.677	3	2042.01	0.0036	0	81.88	DVSALFGTNPPSASSPGSPVR
37	2::AFR95182.1	transketolase [Cryptococcus neoformans var. grubii H99]	140	74685	5	9.6
37	2::XP_012049657.1	transketolase [Cryptococcus neoformans var. grubii H99]	140	74685	5	9.6
Peptide exp mz	Peptide exp z	Peptide calc mr	Peptide delta	Peptide Misscleav	Peptide Score	Peptide Sequence	Peptide var Modi
559.797	2	1117.58	0.002	0	59.33	FDITPEGIAR
596.804	2	1191.59	0.0006	0	37	AEAEWQALFK
734.86	2	1467.7	0.0027	0	37.16	FGFNPEESFAVPK
755.382	2	1508.75	0.0018	0	66.99	ALPTYTTSDAAVGSR
617.29	3	1848.84	0.009	0	74.99	GAEDFQHPSTGLGSYAGR
37	2::AFR94518.1	glutamate decarboxylase [Cryptococcus neoformans var. grubii H99]	136	62948	4	10.1
37	2::XP_012048809.1	glutamate decarboxylase [Cryptococcus neoformans var. grubii H99]	136	62948	4	10.1
Peptide exp mz	Peptide exp z	Peptide calc mr	Peptide delta	Peptide Misscleav	Peptide Score	Peptide Sequence	Peptide var Modi
482.242	2	962.467	0.0018	0	56.63	ESLSGDLSR
532.255	2	1062.5	-0.0021	0	80.01	YGVEDEVPR
576.292	2	1150.6	-0.0281	0	66.28	ALSQHVDPDK	Trimethyl (Protein N-term A) [+42.05]
635.33	2	1268.64	0.0043	0	39.99	AALYDIPYTSR
675.996	3	2024.96	0.0099	0	67.22	NLVDQDEYPAAQQIHER
37	2::AFR92579.1	T-complex protein 1 subunit beta [Cryptococcus neoformans var. grubii H99]	122	56767	4	14.7
37	2::XP_012046721.1	T-complex protein 1 subunit beta [Cryptococcus neoformans var. grubii H99]	122	56767	4	14.7
Peptide exp mz	Peptide exp z	Peptide calc mr	Peptide delta	Peptide Misscleav	Peptide Score	Peptide Sequence	Peptide var Modi
489.257	2	976.498	0.0012	0	51.15	EDLFNIAR
669.336	2	1336.65	0.0028	0	55.25	ILIANTSMDTDK	Oxidation (M)
735.322	2	1468.65	-0.0214	0	67.4	MNVFADEATEER	Oxidation (M); Propyl (N-term) [+42.05]
768.901	2	1535.78	0.0099	0	62.11	FSGVAAGEACTVVLR
814.911	2	1627.8	0.0089	0	65.4	LTDSYLDEGFILDK
574.926	3	1721.73	0.0235	0	43.92	AAHYEGQSDAGLDMDK	Oxidation (M); Asp->Asn (D) [-0.98]
37	2::AFR92180.2	hypothetical protein CNAG_07308 [Cryptococcus neoformans var. grubii H99]	92	60690	3	5.5
37	2::XP_012046164.1	hypothetical protein CNAG_07308 [Cryptococcus neoformans var. grubii H99]	92	60690	3	5.5
Peptide exp mz	Peptide exp z	Peptide calc mr	Peptide delta	Peptide Misscleav	Peptide Score	Peptide Sequence	Peptide var Modi
595.8	2	1189.58	0.0088	0	46.05	WPGITWDSTK
596.267	2	1190.51	0.0062	0	58.83	DQGPPNMFNR	Oxidation (M)
599.257	2	1196.5	0.0018	0	52.75	SQLGYDEAWE
37	2::AFR93435.2	endothelin-converting enzyme [Cryptococcus neoformans var. grubii H99]	80	102087	3	3.4
37	2::XP_012047281.1	endothelin-converting enzyme [Cryptococcus neoformans var. grubii H99]	80	102087	3	3.4
Peptide exp mz	Peptide exp z	Peptide calc mr	Peptide delta	Peptide Misscleav	Peptide Score	Peptide Sequence	Peptide var Modi
548.778	2	1095.53	0.0061	0	53.69	EDFFGNVLR
616.851	2	1231.68	0.0056	0	58.9	LALTYADALGPK
622.784	2	1243.55	0.0031	0	39.65	YWVYDAEGNK
Gel	Protein Accession	Protein Description	Protein Score	Protein Mass	Matched Peptides	Protein Coverage
39	2::AFR94515.1	glucose-methanol-choline oxidoreductase [Cryptococcus neoformans var. grubii H99]	966	65625	20	48
39	2::XP_012048807.1	glucose-methanol-choline oxidoreductase [Cryptococcus neoformans var. grubii H99]	966	65625	20	48
Peptide exp mz	Peptide exp z	Peptide calc mr	Peptide delta	Peptide Misscleav	Peptide Score	Peptide Sequence	Peptide var Modi
382.717	2	763.412	0.0087	0	43.63	IIFEDK
417.743	2	833.468	0.0035	0	60.23	MLSGIGIK	Oxidation (M)
469.267	2	936.514	0.0053	0	44	GLDNHLLR
470.698	2	939.409	-0.0271	0	19.01	NSQYDWK
497.765	2	993.513	0.0021	0	56.84	STAAAFLEGK
527.767	2	1053.52	0.003	0	45.1	NVVYMVGEK	Oxidation (M)
530.828	2	1059.64	0.0047	0	79.45	ILMLSGIGIK	Oxidation (M)
539.241	2	1076.46	0.0117	0	39.02	EYDFYANR
542.799	2	1083.58	0.0015	0	63.2	FGLDNHLLR
557.836	2	1113.65	0.0031	0	48.6	GLLELVAFPR
591.799	2	1181.58	0.008	0	62.93	QNVVYMVGEK	Oxidation (M)
603.315	2	1204.61	0.0058	1	69.67	STAAAFLEGKPN
419.553	3	1255.63	0.0049	0	60.08	DGFGLDNHLLR
628.826	2	1255.63	0.0055	0	50.37	DGFGLDNHLLR
640.342	2	1278.66	0.0052	0	61.12	IQNVVYMVGEK
644.866	2	1287.72	-0.0013	0	104.02	SSGLLELVAFPR
648.344	2	1294.66	0.0151	0	78.45	IQNVVYMVGEK	Oxidation (M)
657.361	2	1312.7	0.0096	0	64.19	TAVGVTVIGPDER
445.214	3	1332.61	0.0135	0	43.58	AGAEHDGAISSYR
696.881	2	1391.73	0.0169	0	78.78	EVIVAQGVYESAK
730.867	2	1459.71	0.0064	0	57.83	ADASVFPLIPDCR
734.894	2	1467.77	0.0018	0	57.94	VADASVFPLIPDCR	Cys->Dha (C) [-33.99]
743.837	2	1485.65	0.012	0	96.08	FVDDVLMNGEGMK	2 Oxidation (M)
744.371	2	1486.72	0.0068	0	79.77	GGSTALNYYTWVR
779.898	2	1557.78	0.0028	0	97.71	GHELTVDVYNGVQK
520.272	3	1557.78	0.0143	0	70.48	GHELTVDVYNGVQK
780.403	2	1558.78	0.0098	0	65.75	VADASVFPLIPDCR
520.605	3	1558.78	0.0108	0	59.75	VADASVFPLIPDCR
832.418	2	1662.81	0.0076	0	122.42	SDLEALSIQCVVDSK
555.281	3	1662.81	0.0087	0	75.86	SDLEALSIQCVVDSK
840.414	2	1678.81	0.0045	0	67.49	SDLEALSIQCVVDSK	Oxidation (V) [+15.99]
847.372	2	1692.73	0.001	0	83.84	DIVECDYPWPMPR	Oxidation (M)
850.448	2	1698.87	0.0095	0	137.97	VLGGSTALNYYTWVR
596.653	3	1786.92	0.0167	0	62.93	DIDHGVVSPELSVHGVK
447.742	4	1786.92	0.0171	0	49.36	DIDHGVVSPELSVHGVK
918.942	2	1835.86	0.0107	0	59.55	STTYHDDLGLFPDDIK
612.968	3	1835.86	0.0239	0	49.9	STTYHDDLGLFPDDIK
934.464	2	1866.9	0.008	0	63.22	NFDFIVLGGGAGGCTVAGR
1035.05	2	2068.07	0.0148	0	121.08	LVEAGVNNPSEITDITTPAK
690.37	3	2068.07	0.0179	0	114.75	LVEAGVNNPSEITDITTPAK
736.404	3	2206.18	0.007	1	63.14	STAAAFLEGKPNITLASSTISK
39	2::AFR94296.1	3-oxoacid CoA-transferase [Cryptococcus neoformans var. grubii H99]	544	60034	12	29.4
39	2::XP_012048673.1	3-oxoacid CoA-transferase [Cryptococcus neoformans var. grubii H99]	544	60034	12	29.4
Peptide exp mz	Peptide exp z	Peptide calc mr	Peptide delta	Peptide Misscleav	Peptide Score	Peptide Sequence	Peptide var Modi
463.788	2	925.56	0.0017	0	39.28	QTIAIPGVK
564.348	2	1126.67	0.0101	0	82.24	LPLTGVSVVSR
578.311	2	1154.6	0.0061	0	63.77	MILSYLGTNK	Oxidation (M)
637.319	2	1272.62	0.0035	0	73.91	EEVDADIINAGK
688.88	2	1375.73	0.0112	0	107.99	IITDLAVFDVDR
484.922	3	1451.74	0.0086	0	38.98	TGAGTHVETGGIPQK
827.364	2	1652.7	0.0119	0	132.68	GMGGAMDLVSNPDETK	Oxidation (M); Ox_CMW (CMW) [+15.99]
616.666	3	1846.97	0.0089	1	87.46	VVPATEDKEIEIFTTR
954.926	2	1907.82	0.0137	0	119.67	EENENVSPSSGEETSVSK
782.384	3	2344.13	0.0029	0	45.22	ETVTLVPGASVFDSSESFGMIR	Oxidation (M)
798.088	3	2391.23	0.0142	0	23.18	DLTVVSNNAGNAGTYGLSPLITSK
935.208	4	3736.78	0.0227	2	107.08	VVPATEDKEIEIFTTREENENVSPSSGEETSVSK
39	2::AFR95026.1	pyruvate dehydrogenase complex dihydrolipoamide acetyltransferase [Cryptococcus neoformans var. grubii H99]	397	50598	9	22.7
39	2::XP_012049327.1	pyruvate dehydrogenase complex dihydrolipoamide acetyltransferase [Cryptococcus neoformans var. grubii H99]	397	50598	9	22.7
Peptide exp mz	Peptide exp z	Peptide calc mr	Peptide delta	Peptide Misscleav	Peptide Score	Peptide Sequence	Peptide var Modi
495.78	2	989.539	0.0054	0	65.9	GLATISAETK
506.276	2	1010.53	0.0082	0	60	LELAPEDPK
510.79	2	1019.57	0.0009	0	48.95	LSVNDFVVK
690.913	2	1379.8	0.0092	0	64.56	IALENGIPLAEIK
717.323	2	1432.63	0.0067	0	43.59	EYMEQPLTFML	2 Oxidation (M)
481.599	3	1441.77	0.0078	1	62.38	TTTKLELAPEDPK
793.909	2	1585.79	0.0085	0	101.41	SQSSTTPAVGIPGEQK
925.936	2	1849.85	0.0065	0	104.25	PAAIAADYEDIPTSNMR	Oxidation (M)
617.628	3	1849.85	0.009	0	87.84	PAAIAADYEDIPTSNMR	Oxidation (M)
701.323	3	2100.93	0.0156	0	85.12	FAMPAMSPTMTEGGIAQWK	2 Oxidation (M); Ox_CMW (CMW) [+15.99]
39	2::AFR97558.1	pyruvate decarboxylase [Cryptococcus neoformans var. grubii H99]	395	68079	12	26.3
39	2::XP_012052124.1	pyruvate decarboxylase [Cryptococcus neoformans var. grubii H99]	395	68079	12	26.3
Peptide exp mz	Peptide exp z	Peptide calc mr	Peptide delta	Peptide Misscleav	Peptide Score	Peptide Sequence	Peptide var Modi
435.248	2	868.477	0.0042	0	61.75	GDAPAGLIR
452.243	2	902.464	0.0065	0	59.46	LVDACGIR
469.747	2	937.469	0.0093	0	81.95	FGMALEVR	Oxidation (M)
486.733	2	971.442	0.0083	0	50.11	FFETPMGK	Oxidation (M)
570.308	2	1138.59	0.014	0	77.55	SVDSPVVPDPK
610.293	2	1218.55	0.0175	0	51.6	SVDSPVVPDPK	Phospho (ST) [+79.97]
640.286	2	1278.55	0.0116	0	80.72	HPLYGGCYAGAN
641.806	2	1281.59	0.0097	0	97.31	TPTSWTEAFDK
497.579	3	1489.7	0.0099	1	64.2	LLDDEEFNKPDR
791.4	2	1580.78	0.0028	0	79.59	IFVLNNDGYEIER
807.378	2	1612.74	0.0039	0	89.48	SDFNSGSFSVNIDPK
828.43	2	1654.85	0.0004	0	91.16	EVESSDFVLYVGALK
463.998	4	1851.95	0.0135	0	30.32	TLHQSYAIHTPQELSK
618.329	3	1851.95	0.0166	0	18.87	TLHQSYAIHTPQELSK
712.357	3	2134.05	0.0011	0	34.13	GVHPYIFVLNNDGYEIER
585.556	4	2338.17	0.0202	1	47.3	AVLEQCRPGYVEVPTDAVHAK
39	2::AFR98685.2	mitochondrial splicing suppressor [Cryptococcus neoformans var. grubii H99]	362	62041	9	25.3
39	2::XP_012053337.1	mitochondrial splicing suppressor [Cryptococcus neoformans var. grubii H99]	362	62041	9	25.3
Peptide exp mz	Peptide exp z	Peptide calc mr	Peptide delta	Peptide Misscleav	Peptide Score	Peptide Sequence	Peptide var Modi
497.241	2	992.456	0.0113	0	44.07	GFPSIDSDR
545.777	2	1089.54	0.0043	0	61.92	TNWGTWGIR
602.298	2	1202.57	0.0086	0	48.71	WEIAEWDVR
605.881	2	1209.74	0.0036	1	44.89	RPLQLILETK
627.809	2	1253.6	0.0065	0	51.63	SVSLCPTSFEK
647.845	2	1293.67	0.004	0	58.65	FTAFSPLDLQR
692.873	2	1383.72	0.0073	0	82.09	GQVLLDGSEEPLK
508.923	3	1523.73	0.0158	1	81.99	LREVNEDEHDLR
653.626	3	1957.86	0.0011	1	43.27	VRPAYDCPDCGWPTHK
672.316	3	2013.92	0.0086	0	65.91	SQDGGWGVPSYTLNYNTR
681.681	3	2042.01	0.0152	0	109.6	DVSALFGTNPPSASSPGSPVR
1022.02	2	2042.01	0.0184	0	101.54	DVSALFGTNPPSASSPGSPVR
39	2::AFR95008.1	aconitate hydratase, mitochondrial [Cryptococcus neoformans var. grubii H99]	348	86776	10	18.7
39	2::XP_012049341.1	aconitate hydratase, mitochondrial [Cryptococcus neoformans var. grubii H99]	348	86776	10	18.7
Peptide exp mz	Peptide exp z	Peptide calc mr	Peptide delta	Peptide Misscleav	Peptide Score	Peptide Sequence	Peptide var Modi
482.282	2	962.544	0.006	0	62.93	VIGVYLDGK
512.768	2	1023.51	0.0076	0	33.65	HSWPQELK
529.241	2	1056.46	0.0048	0	48.4	NDANPATHAF
536.222	2	1070.42	0.006	0	27.91	DGMVDDFEK	Oxidation (M)
542.815	2	1083.6	0.0118	0	85.2	IENNLQVVR
591.805	2	1181.59	0.0025	1	46.16	KGEANSIITSY
617.83	2	1233.64	0.01	0	43.56	FTITPGSEQVR
655.821	2	1309.62	0.009	0	60.66	FSDPSGYELPAK
662.831	2	1323.64	0.0053	0	100.54	GEANSIITSYNR
694.332	2	1386.65	-0.0002	0	62.19	EVYDFLATACAK
946.415	2	1890.81	0.0061	0	96.16	VGLIGSCTNSSYEDMSR	Oxidation (M)
645.655	3	1933.93	0.0144	0	64.94	IVYGHLDNPHEQDIER
484.494	4	1933.93	0.0198	0	36.37	IVYGHLDNPHEQDIER
1097.5	2	2192.99	0.0052	0	101.12	GYDPGENTFQAPPADGTTVSVA
39	2::AFR98086.1	5-methyltetrahydropteroyltriglutamate-homocysteine S-methyltransferase [Cryptococcus neoformans var. grubii H99]	333	85607	10	17.4
39	2::XP_012052830.1	5-methyltetrahydropteroyltriglutamate-homocysteine S-methyltransferase [Cryptococcus neoformans var. grubii H99]	333	85607	10	17.4
Peptide exp mz	Peptide exp z	Peptide calc mr	Peptide delta	Peptide Misscleav	Peptide Score	Peptide Sequence	Peptide var Modi
551.316	2	1100.61	0.0088	0	88.71	VAAITEEQLK
556.312	2	1110.6	0.0067	0	56.64	AIQVDEPAIR
630.84	2	1259.66	0.0054	0	91.6	LDADVISIEASK
712.876	2	1423.73	0.0023	0	58.9	FPTTTIGSFPQTK
475.951	3	1424.82	0.0073	1	47.26	QLEEVVAAIKPTK
723.38	2	1444.74	0.004	0	100.44	ETEESLANLVAAAK
498.922	3	1493.73	0.0137	0	27.55	CGLDLLVHGEPER
529.927	3	1586.75	0.0113	1	43.65	FSKGEITQEEYEK
878.951	2	1755.89	-0.0022	0	40.27	VLPADLMVVNPDCGLK	Oxidation (M)
704.336	3	2109.98	0.011	0	65.54	SYGYSNEIGPGVYDIHSPR
39	2::AFR92579.1	T-complex protein 1 subunit beta [Cryptococcus neoformans var. grubii H99]	255	56767	9	23.1
39	2::XP_012046721.1	T-complex protein 1 subunit beta [Cryptococcus neoformans var. grubii H99]	255	56767	9	23.1
Peptide exp mz	Peptide exp z	Peptide calc mr	Peptide delta	Peptide Misscleav	Peptide Score	Peptide Sequence	Peptide var Modi
511.781	2	1021.54	0.0029	0	40.85	QLGITESFK
662.293	2	1322.58	-0.0057	0	20.64	GATSQMVEEAER	Oxidation (M)
669.339	2	1336.65	0.0087	0	96.56	ILIANTSMDTDK	Oxidation (M)
762.42	2	1522.81	0.0188	0	35.26	LSSFVGAMALGDLVK	Oxidation (M)
768.895	2	1535.78	-0.0007	0	58.77	FSGVAAGEACTVVLR
526.951	3	1577.83	-0.0031	1	66.65	ILIANTSMDTDKIK	Oxidation (M)
814.908	2	1627.8	0.0039	0	91.71	LTDSYLDEGFILDK
639.661	3	1915.95	0.0125	1	50.84	AALQALEASAVDNKDDSAK
618.274	4	2469.05	0.0134	1	58.76	AAHYEGQSDAGLDMDKGEIGSMR	2 Oxidation (M)
39	2::AFR93582.2	proline-tRNA ligase [Cryptococcus neoformans var. grubii H99]	213	83135	8	10.8
39	2::XP_012047323.1	proline-tRNA ligase [Cryptococcus neoformans var. grubii H99]	213	83135	8	10.8
Peptide exp mz	Peptide exp z	Peptide calc mr	Peptide delta	Peptide Misscleav	Peptide Score	Peptide Sequence	Peptide var Modi
498.257	2	994.497	0.0028	0	45.11	TYLDDIQK
507.215	2	1012.41	0.0082	0	43.21	FNDWEMR	Oxidation (M)
595.316	2	1188.61	0.0066	0	70.14	DIANNSTLSVR
648.302	2	1294.58	0.0064	0	57.01	FGEFPQGEEQK
649.307	2	1296.59	0.0084	0	68.17	MFDITVESPDK	Oxidation (M)
700.865	2	1399.71	0.0016	0	63.21	APMPLSDIANTVR	Oxidation (M)
829.94	2	1657.86	0.0083	0	93.4	VVTSWEDVVPTLDAK
575.948	3	1724.8	0.0169	1	31.23	MFDITVESPDKSQGR	Oxidation (M)
39	2::AFR95182.1	transketolase [Cryptococcus neoformans var. grubii H99]	210	74685	6	10.9
39	2::XP_012049657.1	transketolase [Cryptococcus neoformans var. grubii H99]	210	74685	6	10.9
Peptide exp mz	Peptide exp z	Peptide calc mr	Peptide delta	Peptide Misscleav	Peptide Score	Peptide Sequence	Peptide var Modi
492.793	2	983.565	0.006	0	31.61	DAPTIINLK
559.798	2	1117.58	0.0039	0	56.68	FDITPEGIAR
596.807	2	1191.59	0.0067	0	75.86	AEAEWQALFK
734.859	2	1467.7	0.0009	0	66.25	FGFNPEESFAVPK
755.385	2	1508.75	0.0085	0	98.69	ALPTYTTSDAAVGSR
617.291	3	1848.84	0.0129	0	68.79	GAEDFQHPSTGLGSYAGR
39	2::AGV14729.1	pyruvate kinase, variant [Cryptococcus neoformans var. grubii H99]	206	57396	9	18
39	2::AFR98016.2	pyruvate kinase [Cryptococcus neoformans var. grubii H99]	206	61939	9	16.6
39	2::XP_012052462.1	pyruvate kinase [Cryptococcus neoformans var. grubii H99]	206	61939	9	16.6
39	2::XP_012052782.1	pyruvate kinase, variant [Cryptococcus neoformans var. grubii H99]	206	57396	9	18
Peptide exp mz	Peptide exp z	Peptide calc mr	Peptide delta	Peptide Misscleav	Peptide Score	Peptide Sequence	Peptide var Modi
410.237	2	818.454	0.0057	0	39.06	YPIEAVK
471.289	2	940.559	0.0041	0	57.11	PIAIALDTK
499.782	2	997.544	0.0045	0	60.86	VLGPEGADIK
500.809	2	999.596	0.0076	0	53.61	TSIIATIGPK
523.261	2	1044.5	0.0088	0	34.11	WQIDVDNR
572.319	2	1142.62	0.0053	0	52.79	TAVDLPALSEK
595.803	2	1189.59	-0.0004	0	51.66	YPVWFPEPR
673.851	2	1345.68	0.0064	0	63.48	GVYPVWFPEPR
708.356	2	1414.69	0.0057	0	74.4	NSVDMIFASFIR	Oxidation (M)
607.316	3	1818.92	0.0069	0	47.85	GDLGIEIPASQVFMAQK	Oxidation (M)
910.472	2	1818.92	0.0105	0	42.68	GDLGIEIPASQVFMAQK	Oxidation (M)
39	2::AFR97935.1	pre-mRNA-processing factor 19 [Cryptococcus neoformans var. grubii H99]	160	54371	4	12
39	2::XP_012052717.1	pre-mRNA-processing factor 19 [Cryptococcus neoformans var. grubii H99]	160	54371	4	12
Peptide exp mz	Peptide exp z	Peptide calc mr	Peptide delta	Peptide Misscleav	Peptide Score	Peptide Sequence	Peptide var Modi
505.802	2	1009.58	0.0094	0	46.49	SPPTVPVVSK
603.826	2	1205.63	0.0075	0	56.64	AVQVFDLEASK
638.833	2	1275.65	0.0027	0	76.52	LGSEIVLAGMDR	Oxidation (R) [+15.99]
675.84	2	1349.66	0.0054	0	97.55	VMETNQALSSVR	Oxidation (M)
855.434	2	1708.84	0.0108	0	67.63	FDPSAQFLSVVGTDAR
39	2::AFR94562.2	deoxyuridine 5~-triphosphate nucleotidohydrolase [Cryptococcus neoformans var. grubii H99]	156	73956	4	9.5
39	2::XP_012048586.1	deoxyuridine 5~-triphosphate nucleotidohydrolase [Cryptococcus neoformans var. grubii H99]	156	73956	4	9.5
Peptide exp mz	Peptide exp z	Peptide calc mr	Peptide delta	Peptide Misscleav	Peptide Score	Peptide Sequence	Peptide var Modi
497.311	2	992.602	0.0049	0	46.65	LPDIVPLAR
674.326	2	1346.64	0.001	0	74.08	LWDISSSADEPK
774.388	2	1546.76	-0.0022	0	56.17	ISGSAWDTDLVAAGGK
919.162	3	2754.46	0.0052	0	72.45	SAPVYTPSPPAAPTQAPAPAAADVPIAVK
39	2::AFR98895.1	guanine nucleotide-binding protein subunit beta-like protein [Cryptococcus neoformans var. grubii H99]	146	34716	5	18.5
39	2::XP_012053792.1	guanine nucleotide-binding protein subunit beta-like protein [Cryptococcus neoformans var. grubii H99]	146	34716	5	18.5
Peptide exp mz	Peptide exp z	Peptide calc mr	Peptide delta	Peptide Misscleav	Peptide Score	Peptide Sequence	Peptide var Modi
541.764	2	1081.51	0.0052	0	54.43	EDNLYGFPK
560.778	2	1119.54	0.0028	0	48.58	LWNTLGECK
631.342	2	1260.67	-0.0016	0	68.12	LWDLNTGLTTK
754.364	2	1506.7	0.01	0	79.51	DGITMLWDLNEGK	Oxidation (M)
882.426	2	1762.83	0.0104	0	38.59	SLVDDLQPDFDGLSDK
39	2::AFR93132.1	NADH dehydrogenase (quinone), G subunit [Cryptococcus neoformans var. grubii H99]	137	81517	5	7.5
39	2::XP_012047351.1	NADH dehydrogenase (quinone), G subunit [Cryptococcus neoformans var. grubii H99]	137	81517	5	7.5
Peptide exp mz	Peptide exp z	Peptide calc mr	Peptide delta	Peptide Misscleav	Peptide Score	Peptide Sequence	Peptide var Modi
456.238	2	910.455	0.0068	0	35.04	DVAAFFGGK
526.257	2	1050.48	0.0152	0	38.3	MCLVEVER	Oxidation (M)
537.3	2	1072.58	0.0097	0	64.9	DGAAILAEVSK
609.323	2	1216.63	0.0015	0	72.52	LGSENLTLDQK
811.394	2	1620.77	0	0	62.96	FANDVAGVEDLGTTGR
39	2::AFR98612.1	malate dehydrogenase (oxaloacetate-decarboxylating)(NADP) [Cryptococcus neoformans var. grubii H99]	132	65979	5	9.7
39	2::XP_012053449.1	malate dehydrogenase (oxaloacetate-decarboxylating)(NADP) [Cryptococcus neoformans var. grubii H99]	132	65979	5	9.7
Peptide exp mz	Peptide exp z	Peptide calc mr	Peptide delta	Peptide Misscleav	Peptide Score	Peptide Sequence	Peptide var Modi
461.756	2	921.496	0.0009	0	51.38	FWLIDTK
516.792	2	1031.57	0.0052	0	42.95	NDPLYIGLK
739.854	2	1477.7	-0.0027	0	57.34	GLDIEALTEEMNK	Oxidation (M)
788.369	2	1574.72	0.007	0	84.24	QAQEDGVDTNETLR
797.961	2	1593.91	-0.0013	0	30.18	LVTPPQILVVTDGSR
39	2::AFR94156.1	2,3-bisphosphoglycerate-independent phosphoglycerate mutase [Cryptococcus neoformans var. grubii H99]	104	58991	3	7.7
39	2::XP_012048337.1	2,3-bisphosphoglycerate-independent phosphoglycerate mutase [Cryptococcus neoformans var. grubii H99]	104	58991	3	7.7
Peptide exp mz	Peptide exp z	Peptide calc mr	Peptide delta	Peptide Misscleav	Peptide Score	Peptide Sequence	Peptide var Modi
624.31	2	1246.6	0.0064	0	34.7	GDSLYLFNYR
651.36	2	1300.7	0.0074	0	88.66	EVGVGEISTVVGR
661.326	3	1980.95	0.0105	1	43.04	VATYDKQPEMSVQGVADK	Oxidation (M)
39	2::AFR95389.1	phosphoacetylglucosamine mutase [Cryptococcus neoformans var. grubii H99]	75	59943	6	13.5
39	2::XP_012050156.1	phosphoacetylglucosamine mutase [Cryptococcus neoformans var. grubii H99]	75	59943	6	13.5
Peptide exp mz	Peptide exp z	Peptide calc mr	Peptide delta	Peptide Misscleav	Peptide Score	Peptide Sequence	Peptide var Modi
392.26	2	782.501	0.0032	0	38.72	LPSVVLR
561.796	2	1121.57	0.0059	0	41.21	TIFVATDAER
702.879	2	1403.74	0.0021	0	54.72	VDLSQPASVVYAR
503.911	3	1508.7	0.006	1	27.38	SFVRPSGTEDCVR
558.932	3	1673.76	0.0128	1	23.23	GEAYGKPSIEGYMEK	Oxidation (M)
659.987	3	1976.93	0.0121	1	29.47	YPKPEDVNYTYGTAGFR
39	2::AFR94518.1	glutamate decarboxylase [Cryptococcus neoformans var. grubii H99]	74	62948	4	8.3
39	2::XP_012048809.1	glutamate decarboxylase [Cryptococcus neoformans var. grubii H99]	74	62948	4	8.3
Peptide exp mz	Peptide exp z	Peptide calc mr	Peptide delta	Peptide Misscleav	Peptide Score	Peptide Sequence	Peptide var Modi
482.244	2	962.467	0.0074	0	56.52	ESLSGDLSR
532.26	2	1062.5	0.0073	0	60.81	YGVEDEVPR
635.328	2	1268.64	0.001	0	34.47	AALYDIPYTSR
675.998	3	2024.96	0.018	0	22.16	NLVDQDEYPAAQQIHER
39	2::AFR95964.2	anthranilate synthase component I [Cryptococcus neoformans var. grubii H99]	70	59056	3	6.2
39	2::XP_012050317.1	anthranilate synthase component I [Cryptococcus neoformans var. grubii H99]	70	59056	3	6.2
Peptide exp mz	Peptide exp z	Peptide calc mr	Peptide delta	Peptide Misscleav	Peptide Score	Peptide Sequence	Peptide var Modi
500.263	2	998.507	0.0047	0	56	VGYEGFVTK
592.329	2	1182.64	0.008	0	51.9	GDIIQAVPSQR
616.339	2	1230.66	0.0029	0	30.19	SIFPAGTVSGAPK
39	1::ALBU_BOVIN	Serum albumin OS=Bos taurus OX=9913 GN=ALB PE=1 SV=4	590	71244	16	31
Peptide exp mz	Peptide exp z	Peptide calc mr	Peptide delta	Peptide Misscleav	Peptide Score	Peptide Sequence	Peptide var Modi
461.752	2	921.481	0.0091	0	45.07	AEFVEVTK
464.255	2	926.486	0.0099	0	43.93	YLYEIAR
507.816	2	1013.61	0.0052	0	55.28	QTALVELLK
582.321	2	1162.62	0.0044	0	64.91	LVNELTEFAK
417.213	3	1248.61	0.0029	1	48.62	FKDLGEEHFK
653.365	2	1304.71	0.007	0	84.48	HLVDEPQNLIK
708.349	2	1414.68	0.0037	0	81.36	TVMENFVAFVDK	Oxidation (M)
722.333	2	1442.63	0.0167	0	92.55	YICDNQDTISSK
730.327	2	1458.63	0.0105	0	57.16	YICDNQDTISSK	Oxidation (D) [+15.99]
740.402	2	1478.79	0.0003	0	70.23	LGEYGFQNALIVR
751.817	2	1501.61	0.0128	0	61.76	EYEATLEECCAK
756.429	2	1510.84	0.0081	0	94.49	VPQVSTPTLVEVSR
769.408	2	1536.79	0.0068	0	112.76	LGEYGFQNALIVR	Ala->Glu (A) [+58.01]
784.38	2	1566.74	0.011	0	97.31	DAFLGSFLYEYSR
526.264	3	1575.76	0.0091	1	71.19	LKPDPNTLCDEFK
874.362	2	1746.7	0.0117	0	78.77	YNGVFQECCQAEDK
583.895	3	1748.66	0.0094	0	39.69	ECCHGDLLECADDR
627.646	3	1879.91	0.003	1	48	RPCFSALTPDETYVPK

[truncated: 2 more sheets: ID36595, ID39916]
